# Supplementary material
Source: MDPI journal article supplement (https://www.mdpi.com/2073-4395/11/11/2344)
Supplement: s1 [file s1]

Archive with 2 entries (2 files):
- Supporting information 1.pdf
- Supporting information 2.xlsx
