# Supplementary material
Source: MDPI journal article supplement (https://www.mdpi.com/2073-4395/11/11/2344)
Supplement: s1 [file s1 › Supporting information 2.xlsx]

## Sheet: Contents
Contents
Table S1 The predicted and observed yields of silage maize in different regions of Czechia in 2002-2018
Table S2 The predicted and observed yields of grain maize in different regions of Czechia in 2002-2018
Table S3 The predicted and observed yields of grain maize in different regions of Czechia in 2002-2018
Table S4 The newly predictive yeilds of silgae maize in different regions of Czechia by ELM1 model
Table S5 The newly predictive yeilds of grain maize in different regions of Czechia by ELM2 model

## Sheet: Table S1
Table S1. The predicted and observed yields of Silage Maize in different regions of Czechia in 2002-2018
No.	Dataset	Region	No.	1	2	3	4	5	6	7	8	9	10	11	12	13	14	15	16	17	18	19	20	21	22	23	24	25	26	27	28	29	30
			Climate factor	water deficit	water deficit	water deficit	water deficit	Temp. Mean	Temp. Mean	Temp. Mean	Temp. Mean	Temp. Max	Temp. Max	Temp. Max	Temp. Max	Temp Min	Temp Min	Temp Min	Temp Min	humidity	humidity	humidity	humidity	precipitation	precipitation	precipitation	precipitation	Sunshine	Sunshine	Sunshine	Sunshine	Observed Yield (t/Ha)	Predicted Yield (t/Ha)
			Units	(mm)	(mm)	(mm)	(mm)	（℃）	（℃）	（℃）	（℃）	（℃）	（℃）	（℃）	（℃）	（℃）	（℃）	（℃）	（℃）	(%)	(%)	(%)	(%)	(mm)	(mm)	(mm)	(mm)	(hours)	(hours)	(hours)	(hours)
			Month	05	06	07	08	05	06	07	08	05	06	07	08	05	06	07	08	05	06	07	08	05	06	07	08	05	06	07	08		Predicted Yield (t/Ha)
1	train	Liberec	2002	-15.4316	-0.431563	-11.8631	-86.761	14.6484	16.4067	17.8935	18.4548	20.129	22.01	23.2968	24.4516	9.51613	10.93	12.5548	13.5935	76.6774	74.2	76.3871	80.0968	1.4	1.73	2.84194	7.18387	7.20323	7.65	6.65161	7.62903	35.8537	37.276
2	train	Liberec	2003	-33.4316	24.1369	-20.4316	33.239	14.429	18.6667	17.9645	19.1	20.6323	25.1733	24.0677	26.8452	8.6129	12.06	12.2097	11.8742	69.3226	60.7667	69.0645	59.7097	2.18065	0.883333	2.76452	0.467742	7.83226	9.46333	7.20968	9.64194	26.2492	28.3421
3	train	Liberec	2004	-52.4316	-26.8631	-22.8631	-22.761	11.1516	15.13	16.9258	18.0903	16.5742	20.9133	23.0581	24.7065	5.66452	9.94333	11.7065	12.4065	75.2903	75.2667	75.6774	72.9677	2.16452	2.36333	2.76774	1.70323	5.31935	5.98333	7.11613	7.97419	30.4204	35.1715
4	train	Liberec	2005	-65.4316	-39.4316	-100.863	-65.3295	12.8581	15.49	17.871	15.4871	18.9419	21.0733	23.8484	21.7516	7.63871	9.24667	12.7516	10.3516	72.2258	70.4667	76.1613	80.5161	2.26452	2.56	3.99677	2.94839	7.31935	8.32667	6.53226	6.78065	35.6023	37.9831
5	test	Liberec	2006	-49.4316	-19.8631	58.1369	-150.329	12.5	16.8767	21.9484	15.1548	18.6548	23.24	29.3484	20.1161	6.92581	10.3933	14.1323	11.8645	67.7097	68.5333	59.0968	82.9677	2.61935	2.79667	1.16774	7.57419	6.95484	8.31333	10.9548	3.95161	32.49	26.8946
6	train	Liberec	2007	-15.4316	-25.8631	-48.8631	-47.3295	14.1935	17.5	17.4839	16.9452	20.4806	23.7433	23.4581	23.9871	7.57097	11.6933	12.2806	10.9839	65.1613	70.8667	70.6129	73.2581	2.75484	3.13667	2.58065	2.06452	7.39355	6.9	6.18065	6.86452	33.4184	38.7128
7	train	Liberec	2008	-19.4316	-2.43156	-26.8631	-51.761	13.1645	16.86	17.2484	16.829	19.7935	23.0967	23.3742	22.8	6.80968	10.19	11.6194	11.6935	70.2581	66.4	73.6774	74.4194	0.790323	1.71667	3.73548	2.71613	8.17419	7.49667	6.46129	6.40968	34.8386	37.0914
8	train	Liberec	2009	-75.4316	-87.4316	-82.4316	-17.3295	12.7065	13.8867	17.3194	17.4968	18.4161	19.22	23.4355	24.0355	6.70323	9.30667	12.3935	11.5839	66.2903	73.0333	67.4516	63.871	4.63871	3.56333	3.31935	2.79032	6.54839	4.61667	6.05806	8.64839	39.1975	42.1484
9	train	Liberec	2010	-119.432	-23.4316	-36.4316	-257.329	10.571	15.76	19.5258	16.4516	14.8387	21.2967	26.1548	21.1774	6.96452	9.16333	12.8968	12.0226	75.8387	65.5667	61.6452	72.1935	4.62581	2.63333	5.05161	13.3548	2.10323	8.04667	8.26774	4.62903	32.8313	34.2752
10	test	Liberec	2011	-33.4316	-50.8631	-183.432	-65.3295	13.1258	16.3033	15.8419	17.4226	19.5258	22.2833	20.4645	23.4	6.27419	10.5933	11.4097	12.4903	59.4516	66.8333	72.4839	72.5484	2.12903	2.75667	9.67097	2.79032	9.39355	7.17	5.19677	6.2129	40.2452	38.2089
11	train	Liberec	2012	-13.4316	-12.4316	-102.863	-65.3295	14.2645	15.8633	17.7226	17.2355	20.3032	21.2033	23.6677	23.8323	7.77742	10.3933	12.4839	11.4935	57.4839	66.7667	68.3226	66.4839	1.19355	2.13667	4.87419	4.49677	7.96452	5.43667	6.85806	7.43226	42.4461	41.6135
12	train	Liberec	2013	-88.4316	-138.432	-41.4316	-21.761	12.0419	15.5433	18.6032	17.2355	16.7355	20.6	25.3129	24.3032	7.67742	10.4767	12.0387	11.1677	75.8387	75.4333	67.4194	68.3548	4.29677	6.72	4.05161	2.08387	4.25161	5.35	8.19355	7.26452	33.6377	35.0821
13	train	Liberec	2014	-105.432	-8.43156	-33.4316	-41.3295	11.871	15.52	19.1161	15.9742	16.8226	21.66	25.4903	21.4613	7.12903	9.48	13.8194	10.9419	74.6452	64.2333	70.7419	74.2258	4.23871	1.49667	3.26129	2.84839	4.62581	6.82333	7.06452	4.96774	41.4954	41.1336
14	train	Liberec	2015	-23.4316	-25.4316	3.13687	15.6705	11.971	14.9033	19.1903	21.171	17.5258	20.7133	25.7613	27.9516	5.68387	9.34333	13.0355	14.629	63.5161	68.6	59.3871	59.9677	0.974194	3.07667	1.48065	2.4871	6.79355	6.04	7.91935	8.18387	32.1551	33.2204
15	test	Liberec	2016	-16.4316	-56.4316	-74.4316	-19.3295	13.2387	16.56	17.771	16.0452	19.2581	22.16	23.5161	22.2161	7.00968	10.9267	12.3065	10.3032	63.2581	70.5667	69.3871	71.129	1.0871	4.85333	4.28387	1.50323	6.79032	6.14667	6.13871	6.2	43.7735	41.5792
16	train	Liberec	2017	-26.4316	-32.4316	-78.4316	-45.3295	13.2323	17.2467	17.6484	17.5484	18.7645	23.1433	23.3258	23.1613	7.55806	10.5267	12.1323	12.1355	65.7419	61.1	70.4839	71.2903	1.4	3.23667	5.65161	3.29355	7.28387	8.63	5.92258	7.0129	39.5752	39.992
17	train	Liberec	2018	8.56844	-0.431563	43.1369	48.6705	15.5065	16.6	19.0323	20.0806	22.0452	22.83	26.0355	27.7968	8.79677	11.5467	11.3258	13.1968	63.1613	66.7	54.9677	53.7097	1.94516	2.28667	0.867742	0.890323	8.69677	5.95667	9.20968	7.85161	33.357	30.6612
18	train	Moravian-Silesian	2002	-40.0327	-63.0655	-42.0327	-55.2715	13.8823	14.9233	16.9468	16.6274	19.2242	19.935	22.5565	21.5419	9.18065	10.35	12.0516	12.8597	74.8387	77.2333	75.9032	80.3065	4.31129	5.045	3.19839	6.14355	7.31613	7.685	7.89355	6.38871	35.2335	32.7458
19	train	Moravian-Silesian	2003	-54.0327	18.9345	-46.0327	5.76121	13.3177	17.15	16.279	17.5935	19.3435	23.3233	21.4403	24.5	8.2871	11.5883	12.1968	12.1161	75.6935	67.5167	79.2903	67.3387	2.48548	1.06	5.22581	0.932258	7.69355	9.55667	5.77903	9.85968	26.6967	31.3784
20	test	Moravian-Silesian	2004	-41.0327	-65.0655	-28.0327	22.7612	9.00645	13.2033	15.1242	16.1419	14.2935	18.3917	20.5823	21.9565	4.68871	9.23667	11.0081	11.4645	75.2581	78.4167	76.9194	73.3226	1.88548	4.45333	2.5	1.75161	5.80645	5.485	6.56129	7.49516	30.4985	36.8387
21	train	Moravian-Silesian	2005	-78.0327	-39.0327	-76.0655	-95.2388	11.1855	13.4233	16.4339	13.9823	16.8468	18.43	21.5355	18.779	6.1129	9.01167	12.2016	10.429	74.2903	77.35	78.1774	82.8065	3.90323	3.44167	4.28226	5.72097	8.07419	7.39667	7.10806	5.62097	35.3055	35.1764
22	train	Moravian-Silesian	2006	-66.0327	-65.0327	27.9673	-97.2388	10.4645	14.9183	19.5194	13.7113	15.5081	19.8317	25.4887	18.1081	6.1	10.185	13.7532	10.5419	74.9355	77.0167	63.871	84.871	4.14194	3.63833	1.16452	6.1871	5.5871	7.21333	10.729	4.12258	31.6257	31.2141
23	train	Moravian-Silesian	2007	-16.0327	-19.0655	-23.0655	-12.2715	12.3565	15.855	16.5065	16.0081	17.5177	21.28	21.9113	21.3968	7.28065	11.3367	11.5629	11.3516	71.4516	71.4667	69.2419	72.8548	2.15645	3.39833	3.00645	2.32581	6.58387	6.53667	7.1629	6.47258	33.1915	37.3722
24	train	Moravian-Silesian	2008	-70.0327	-35.0327	-94.0655	-54.2388	11.1161	15.2667	15.6613	15.5145	16.1274	20.6567	20.4323	21.0081	6.55968	10.57	11.5694	11.0887	76.7581	72.0833	74.5645	73.1613	2.45323	3.645	6.50323	3.97903	6.28871	7.675	6.40484	7.41935	34.4047	39.5282
25	test	Moravian-Silesian	2009	-40.0327	-135.033	-70.0327	-10.2388	11.0581	12.9533	16.8355	16.3323	16.6435	17.3533	22.3371	21.5806	6.1	8.77667	12.129	11.7919	74.5968	82.8833	74.6935	74.7903	3.0871	5.25667	4.11774	2.35968	6.46452	3.85667	7.82419	7.82903	38.6253	38.8091
26	train	Moravian-Silesian	2010	-269.033	-74.0327	-115.033	-92.2388	9.45645	14.3267	17.6806	15.4081	13.1081	18.64	22.5694	20.2935	6.75161	10.03	13.1758	11.4452	89.129	77.15	74.4839	81.2581	13.271	5.115	6.77258	5.67903	1.84032	7.05167	7.46129	5.84032	32.3733	31.2153
27	train	Moravian-Silesian	2011	-77.0327	-73.0327	-149.033	-39.2388	10.8661	14.4833	14.4871	16.5242	16.4613	19.0667	18.6355	21.6887	5.39677	10.31	10.9403	12.1081	69.2742	79	81.8548	75.7581	4.08548	4.83667	8.28065	3.12419	8.73548	4.81333	4.61935	7.41935	40.1386	42.4134
28	train	Moravian-Silesian	2012	-22.0327	-44.0327	-34.0327	4.72849	12.3065	15.2133	17.3435	16.7194	18.0435	19.9567	22.7065	22.2274	6.88871	10.7017	12.8516	11.9339	65.7742	77	70.6774	68.4355	1.85806	5.74167	4.01452	2.19839	7.62258	6.02833	6.46774	7.15484	41.473	39.6462
29	train	Moravian-Silesian	2013	-96.0327	-121.033	19.9673	13.7612	10.7387	14.1217	17.05	16.4887	15.3516	18.3117	22.2242	21.9581	6.98871	10.52	11.7774	11.5468	78.6935	82.5	68.9355	68.5806	3.90645	6.24833	1.68065	2.27581	4.3129	4.875	8.62742	7.69194	34.5981	34.435
30	test	Moravian-Silesian	2014	-126.033	-50.0327	-52.0655	-81.2388	10.229	13.55	17.1065	14.0984	14.9177	18.5783	22.4694	18.95	5.85645	8.83167	12.529	10.5274	77.6935	69	74.6613	81.371	5.68871	2.695	4.5871	4.30806	5.52258	7.28167	7.12581	4.90968	41.2238	40.3412
31	train	Moravian-Silesian	2015	-60.0327	-20.0327	40.9673	39.7612	9.97097	14.1383	18.2597	19.6581	14.5758	19.0133	24.0677	25.7516	5.84355	9.31	12.3484	14.1145	75.3065	72.1	64.1452	63.5968	3.59516	1.98333	1.82903	2.14032	5.05484	6.79667	8.81613	8.50323	32.0347	30.648
32	train	Moravian-Silesian	2016	-43.0327	-20.0655	-91.0655	-31.2388	11.4613	15.795	16.6516	15.0984	16.7161	21.265	22.0016	20.1581	6.7	10.905	12.2613	10.7952	73.2258	73.65	77.8387	79.0484	2.05323	2.255	5.67742	2.85161	6.39677	8.08167	6.27742	6.92581	43.6819	41.7233
33	train	Moravian-Silesian	2017	-43.0327	-12.0655	-29.0327	-13.2715	11.3758	16.0367	16.35	17.3419	16.5242	21.5583	21.9355	23.4081	6.89032	10.6167	11.8871	12.3532	76.4839	66.5667	72.129	71.8226	3.1871	2.82	3.31935	2.59839	6.13548	9.01833	6.93387	7.54355	39.5611	35.0256
34	train	Moravian-Silesian	2018	-0.0327267	-53.0655	-28.0327	25.7612	14.1726	15.0533	17.0452	18.7548	19.3694	19.88	22.1613	24.4355	9.35	11.505	12.3242	13.6565	69.0968	79.6	72.7097	66.9677	2.90484	5.07167	5.80484	1.95323	7.98871	4.705	7.3	8.98226	33.3556	35.54
35	test	South Moravian	2002	-4.00786	-17.0079	-15.0157	-36.2942	17.0516	19.1333	20.8871	20.429	21.8742	24.2433	26.9	25.4097	12.0968	12.9967	14.9032	15.5452	70.4839	67.6333	64.7097	71.871	1.47742	2.72333	1.87097	2.94194	7.6871	9.71333	9.29032	7.13548	31.8723	29.8081
36	train	South Moravian	2003	-25.0079	55.9843	13.9921	62.7058	17.1613	21.3167	20.3355	22.5065	22.5419	26.5933	25.8968	29.2129	11.3935	14.7333	14.3065	15.4161	65.9677	61.7333	65.9355	54.6452	2.99355	1.99333	2.13226	1.19355	9.50645	10.64	7.42581	10.3323	26.7867	30.8082
37	train	South Moravian	2004	-8.00786	-32.0079	8.99214	41.7058	13.0935	17.0033	19.1968	20.2	18.1774	21.85	24.6032	26.4065	7.5129	11.6233	13.3129	14.1355	68.3871	74.6	69.4516	63.7419	0.503226	2.58333	1.13548	0.670968	6.46452	6.59667	7.44839	8.2871	31.4527	34.01
38	train	South Moravian	2005	-53.0079	-4.01573	-31.0079	-60.2942	14.8032	17.4833	19.0581	17.5161	19.8903	22.2467	24.2548	22.5097	8.68387	12.0167	14.1	12.4194	67.2258	65.7333	70.1613	67.3226	3.13548	1.95	2.9871	2.75484	8.97419	9.01667	7.09355	6.91935	34.8015	37.8415
39	train	South Moravian	2006	-50.0079	-25.0157	57.9843	-85.2942	13.9452	18.3067	22.7032	16.2516	18.7806	23.0067	28.4065	21.0806	8.7129	12.34	15.9548	11.9613	63.2903	62.8333	54.6774	72.5161	2.55161	2.33667	2.39032	4.66129	6.39677	8.37	10.7484	5	27.7379	29.2836
40	test	South Moravian	2007	17.9921	1.99214	23.9921	29.7058	15.6516	20.0933	21.1129	20.8774	20.9548	25.6167	26.8548	26.7839	9.71613	14.16	14.5903	14.9065	59.6129	64.1333	58.4516	59.3871	1.40645	3.12333	1.14839	1.17742	7.6129	7.98333	8.67419	8.01935	31.1797	32.6925
41	train	South Moravian	2008	-27.0079	18.9921	4.99214	23.7058	15.4774	19.9333	20.3226	19.9387	20.5161	25.3767	26.1194	25.7548	9.34839	13.79	14.3065	13.9323	64.7419	61.5333	62	62.129	2.24516	1.19667	2	1.43871	7.08387	7.93667	7.02258	7.54839	33.4464	33.2255
42	train	South Moravian	2009	-0.0078633	-49.0157	-69.0079	8.70575	15.4484	17.3133	20.4484	20.8839	20.8258	22.1167	26.4065	26.4484	9.5871	12.2233	14.1613	14.8065	63.2903	69.6667	68.1613	63.5484	1.20968	3.31667	3.87419	0.829032	7.4	5.94333	8.79677	8.63871	36.9079	38.7754
43	train	South Moravian	2010	-120.008	-54.0079	-50.0157	-62.3021	13.6065	18.5167	21.8677	19.2258	17.4419	22.9233	27.2613	24.1548	10.4581	13.35	16.2194	14.0645	79.7742	69.5	66.9032	75.0645	3.93548	2.81	4.39032	2.54839	3	7.46	8.45161	7.20323	31.0195	33.4802
44	train	South Moravian	2011	-20.0079	9.98427	-18.0079	17.6979	15.1097	19.1767	18.8516	20.5194	20.6452	24.5133	23.671	26.4065	8.25484	13.9133	14.1161	14.729	61.4516	64.5333	66.2581	66.5161	1.42581	2.05333	2.9871	1.14839	9.52903	7.43	6.10968	7.8871	39.2616	37.4164
45	test	South Moravian	2012	10.9921	-24.0079	-26.0157	26.6979	16.871	19.64	21.0387	21.2871	22.8774	24.7267	27.2452	27.5548	10.3903	13.8833	15.4774	14.7968	52.8065	65.8667	65.7097	58.6129	0.906452	2.83	1.67419	1.86774	8.78065	7.23667	6.88387	8.40645	37.7359	41.7892
46	train	South Moravian	2013	-61.0079	-86.0079	45.9921	3.70575	14.1032	17.9467	22.2129	20.9032	18.4581	22.6533	27.9258	26.6129	9.66774	13.0033	15.3	14.9613	73.9032	71.6667	55.3226	59	4.43871	3.41667	0.13871	2.92903	5.15161	6.64333	11.0419	8.51935	37.932	37.4786
47	train	South Moravian	2014	-40.0079	17.9843	-4.00786	-51.3021	14.4419	19.0633	21.7677	18.0323	19.3839	24.45	27.6355	22.8903	9.39355	12.2833	15.7742	13.4	66.3548	53	62.0968	74.8387	2.47097	1.01667	3.12903	3.89677	5.26774	7.31333	6.41613	4.53226	40.9698	40.9584
48	train	South Moravian	2015	-2.00786	37.9921	54.9921	3.70575	14.5645	19.0167	22.9355	23.971	19.0032	24.3233	29.4032	29.829	9.38065	12.85	15.6581	17.5484	66.7742	61.1333	55.2258	56.3226	1.56129	1.4	1.27419	2.83871	5.12581	8.35	9.52903	8.7129	31.5241	32.7353
49	train	South Moravian	2016	-19.0079	22.9921	-42.0079	-2.29425	15.5968	19.8467	21.2839	19.5839	20.5129	25.0367	27.1323	24.9129	9.70968	13.6833	15.3419	14.0387	65.9032	66.9333	66.0968	67.7742	1.43226	2.48333	3.28387	1.97097	7.19355	8.24	7.86774	7.9129	44.0463	38.0264
50	test	South Moravian	2017	-6.00786	47.9921	2.99214	48.7058	15.9806	21.0233	21.2065	22.0806	21.4774	27.28	26.9355	28.2581	9.77419	13.7867	14.9968	15.5516	62.7097	53.4	60	57.5484	1.43548	1.16667	2.6	0.9	8.72903	10.6667	7.55161	8.99677	39.7669	35.1493
51	train	South Moravian	2018	21.9921	13.9921	35.9921	64.7058	18.5226	20.3933	22.3452	23.9194	23.9419	25.8733	28.1677	30	12.6645	15.0833	15.7355	17.4484	61.7742	59.6	54.7742	51.4839	1.55484	1.04667	1.99355	1.02258	9.18387	6.49667	7.87097	9.40645	32.6649	34.8203
52	train	Usti nad Labem	2002	-34.1464	-14.2927	-23.2927	-96.5739	12.4774	14.9933	15.7452	16.7032	19.4226	21.5133	22.2161	23.171	8.45484	10.7467	11.6677	13.2065	79.3871	76.1667	79.0968	81.5806	1.19677	2.84333	2.20968	4.02581	6.69677	8.16333	7	7.60323	32.6227	31.9133
53	train	Usti nad Labem	2003	-17.1464	39.8536	-20.1464	48.4261	12.3677	17.1	16.2194	18.7161	19.3742	24.4067	22.6968	25.8645	8.05484	12.4933	12.3548	14.1774	72.9032	67.2	74.1935	58.8387	1.45806	1.30333	3.09355	0.209677	7.63548	10.6667	7.46774	10.371	26.6149	27.1461
54	train	Usti nad Labem	2004	-63.1464	-32.1464	-17.2927	2.42609	8.61613	13.09	14.7355	16.2774	14.3613	19.4967	21.5323	22.9645	5.1129	9.33333	10.8355	12.2968	79.4194	76.7333	77.5484	73.3548	2.35806	1.64	2.23226	1.34516	5.32258	5.99667	7.22903	7.27419	31.2742	32.9662
55	test	Usti nad Labem	2005	-51.1464	-21.2927	-51.1464	-45.4275	10.7387	13.3933	15.7871	13.4806	17.6645	19.5233	22.0742	19.1903	6.58387	9.32333	11.9194	10.3194	75.3226	73.5333	79.2258	82.5484	2.58387	2.23	4.54194	2.95161	7.57419	9.08	6.84194	6.34839	34.9858	35.6343
56	train	Usti nad Labem	2006	-41.1464	-1.29274	55.8536	-37.4275	10.6581	15.0267	20.5613	12.8548	17.0871	21.75	28.171	18.5387	6.78387	10.4333	15.5613	10.1129	69.9355	71.4667	62.2581	85.0645	1.71935	1.61	1.55161	2.4	7.04839	9.51	10.8935	4.61613	28.6576	29.4577
57	train	Usti nad Labem	2007	-34.1464	-28.1464	-15.1464	-47.5739	12.3806	15.7867	15.5581	15.3484	19.7032	22.6867	21.7194	21.7194	7.72258	11.5467	12.0226	11.4	72.3226	77.8667	77.8065	78.4839	4.6	2.23	3.06452	2.06452	8.14516	7.91	7.10645	7.34516	31.578	36.0721
58	train	Usti nad Labem	2008	-11.1464	3.85363	-0.146371	-3.57391	11.929	15.07	15.6516	15.2355	18.6065	21.71	21.8581	21.3613	8.00645	11.2267	11.6677	11.4065	74.6774	74	77.4194	77.871	1.18065	1.49667	2.44839	2.23871	8.09355	8.32333	7.19032	7.01613	33.7509	35.8983
59	train	Usti nad Labem	2009	-55.1464	-52.1464	-49.2927	-17.5739	11.2677	12.1767	15.8516	16.7097	17.5903	17.7967	22.4387	23.1968	7.16452	8.78667	12.3613	12.5194	77.1613	81.3	76.3871	70.6774	3.41935	2.17333	2.93548	1.67097	6.87742	5.46333	6.98387	9.65484	37.3812	38.691
60	test	Usti nad Labem	2010	-82.1464	-14.1464	-48.1464	-151.428	8.45484	14.46	18.3613	14.8	13.2903	20.4667	24.7419	20.1839	5.57742	10.1	14.1935	11.6484	84.4839	70.5667	68.0968	82.7419	2.81935	1.60667	4.60645	6.47742	3.22581	8.82333	8.69355	5.43871	31.395	35.0714
61	train	Usti nad Labem	2011	-32.1464	-19.2927	-86.2927	-37.4275	11.7645	14.6633	13.9613	15.8645	19.0129	21.1767	19.4452	22.0742	7.02903	10.5467	10.5323	12.271	64.5806	72.0333	77.8387	77.2581	2.00968	1.95	5.45161	1.92903	9.43226	7.56	5.87419	6.87097	39.4379	36.4542
62	train	Usti nad Labem	2012	-12.1464	-5.14637	-63.2927	-18.4275	12.7323	14.0633	15.6323	16.6226	19.8032	20.6333	21.6452	23.1806	8.1871	9.94333	12.4742	12.6774	63.9677	74.9667	76.5161	67.7419	1.56452	2.28667	4.14194	1.97742	8.64839	6.61667	6.76452	8.49355	38.67	37.17
63	train	Usti nad Labem	2013	-106.146	-111.146	14.8536	-29.4275	9.67742	13.96	17.9452	15.971	15.2452	19.58	24.4774	22.4452	6.35161	10.12	13.7935	12.3613	81.8387	76.1	65.3871	69.4839	4.4	2.87	1.20323	2.63871	4.27742	6.77667	9.94516	7.76774	37.0661	33.8033
64	train	Usti nad Labem	2014	-79.1464	-4.14637	-36.1464	-47.4275	9.55161	13.8567	17.2613	13.7258	15.6613	20.2167	23.3516	19.2548	6.07419	10.05	13.5387	10.7935	79.0968	68.1333	72.5806	76.4516	2.89677	0.953333	2.51613	2.30645	5.60323	7.22667	5.86452	3.83871	41.1056	40.3151
65	test	Usti nad Labem	2015	-8.14637	-32.1464	3.85363	-1.42754	10.0839	12.7433	17.3161	19.329	15.9161	18.4333	23.4323	25.4839	6.09355	8.96667	13.0677	14.8581	68.3226	76.5667	66.871	65.9355	1.25161	2.91667	1.35161	2.65484	6.90645	6.66667	9.20323	9.13548	31.6473	34.1245
66	train	Usti nad Labem	2016	-22.1464	-43.1464	-45.1464	3.42609	11.3742	15.1467	16.2226	15.2097	17.9097	21.1867	21.7484	20.8323	7.37097	11.6867	12.7516	11.5258	71.9032	78.3333	75.9677	75.3871	1.23226	3.32667	2.76129	1.32258	5.73226	5.47	5.58065	6.86129	44.0209	38.7217
67	train	Usti nad Labem	2017	-8.14637	-14.1464	-19.2927	-26.5739	12.0161	15.4833	15.9677	16.0871	18.4387	22.1833	22.1194	21.8645	7.70323	11.1567	12.4387	12.2742	71.7097	69.3	77.5484	76.3871	1.59032	2.68333	2.26452	2.72258	7.41935	9.62	6.40968	7.63226	39.7393	35.4658
68	train	Usti nad Labem	2018	2.85363	18.8536	60.8536	45.5725	14.3645	15.26	18.5	18.8516	21.2516	21.71	25.2194	26.3	9.64839	11.44	13.6548	14.1839	69.4516	74.7667	58.7097	62.2258	0.790323	0.896667	0.409677	1.6	9.64194	7.25333	9.94194	8.57419	32.7747	32.4215
69	train	Vysočina	2002	-10.8781	-25.8781	-38.7563	-135.055	8.94096	10.0213	12.2734	16.3758	13.3419	15.2499	17.5086	21.6887	4.85645	5.0993	7.36371	11.5726	76.0536	74.4661	71.8484	74.7419	1.75225	2.07672	1.74516	4.0629	5.67725	7.01839	6.48183	6.97258	36.6679	35.9659
70	test	Vysočina	2003	-80.8781	22.1219	0.121862	48.8231	5	11.1785	12.5485	17.6677	10.2458	17.0311	18.2999	24.3581	-0.047235	5.8829	6.83392	11.1935	74.2604	68.9065	64.7108	62.5806	1.7659	0.75371	1.57484	2.26613	6.62356	7.88414	7.21968	9.67097	26.341	22.9447
71	train	Vysočina	2004	-38.8781	-39.7563	-20.8781	11.8231	5.64689	8.5786	12.7281	14.4323	9.70729	13.1323	18.0861	20.2468	1.68376	4.01355	7.44048	9.09032	77.8109	77.5898	74.0495	72.0645	1.66691	2.11339	1.63306	1.93065	4.06274	5.08446	6.73505	7.15484	30.1634	35.1886
72	train	Vysočina	2005	-50.8781	-3.75628	-77.8781	-62.1769	3.62114	7.51677	12.4848	13.4968	8.23721	12.347	17.8097	19.1016	-0.8375	2.35651	7.42	8.14032	85.1417	75.2333	73.0478	75.8871	2.91555	0.962527	3.46812	2.16129	5.19718	6.55274	6.72409	7.22258	35.6706	37.9714
73	train	Vysočina	2006	-77.8781	-47.8781	32.2437	-107.177	4.09752	7.57054	13.6754	13.0048	8.29194	12.2209	19.7354	17.9468	-0.211924	2.92237	7.915	8.60161	79.212	79.8382	73.4263	77.129	2.15121	2.42742	1.58683	3.91452	4.78871	5.81376	7.49478	5.44677	33.3931	33.6526
74	train	Vysočina	2007	-14.8781	-5.75628	-3.87814	25.945	8.1038	11.1792	14.0031	15.629	12.3109	16.3258	20.0076	21.4113	3.74349	6.17516	7.61968	9.66774	83.2851	78.7866	65.2876	71.8387	1.98197	1.91102	1.37032	1.58871	5.16688	6.22548	8.73667	7.35323	33.9439	30.9061
75	test	Vysočina	2008	-26.8781	7.12186	-15.8781	-6.05502	7.63192	9.78419	12.4653	15.3516	12.2293	14.5654	17.676	20.6903	2.91385	5.04677	7.41285	9.38065	77.9032	78.822	77.8344	72.4194	1.32481	1.8822	1.67333	1.97742	5.99933	5.75866	5.86419	7.42581	35.0029	38.5186
76	train	Vysočina	2009	-25.8781	-99.7563	-83.8781	-36.1769	5.49073	8.35328	14.6685	15.4548	9.09009	12.4847	20.6783	21.0258	1.70789	4.76392	8.68194	9.74516	83.235	81.8038	69.8602	72.6935	3.04626	3.56194	2.28435	2.35645	4.01636	3.54726	8.50108	7.53548	39.5462	39.2801
77	train	Vysočina	2010	-90.8781	-51.8781	-55.7563	-116.177	4.32598	9.13306	13.6189	13.8387	7.62247	13.5148	19.0559	18.3032	1.33065	4.47468	7.72849	9.89032	83.7206	73.2753	70.8581	80.8065	2.23629	1.59925	2.87204	4.4629	2.29343	6.40054	8.14409	4.17903	33.1043	33.8568
78	train	Vysočina	2011	-7.87814	-13.7563	-62.7563	-20.1769	4.73929	9.98177	13.0291	15.4177	9.37425	15.2602	18.2541	21.179	-0.295565	5.18919	8.05866	9.56613	75.6267	72.364	73.2995	72.9839	1.09522	1.97833	2.715	2.74677	6.22938	6.70091	6.3986	8.03226	40.4723	42.4295
79	train	Vysočina	2012	-27.8781	-8.87814	-42.7563	-24.1769	4.25456	11.0524	13.0883	16.2306	8.56663	16.2195	18.3755	22.2177	-0.56574	6.25683	8.1886	10.2274	75.2147	75.6962	75.0495	69.5645	1.78637	1.23419	2.80478	2.0371	6.11285	6.40715	6.28022	8.1871	43.2766	40.9989
80	test	Vysočina	2013	-85.8781	-104.878	16.1219	-2.17688	5.25058	7.44941	13.5499	14.6129	8.51959	11.4626	18.7222	19.8742	2.54954	3.74844	8.0193	9.61129	84.6382	79.5919	71.3355	73.3871	2.59862	2.5486	0.86371	2.71613	2.78802	4.60495	7.41113	6.1871	32.9211	30.5423
81	train	Vysočina	2014	-97.8781	-1.87814	-11.8781	-56.055	6.62437	10.7908	14.0126	13.4452	10.83	16.2894	19.8442	18.2403	2.91872	5.27769	8.54054	8.92903	79.1538	67.7484	70.4409	75.8871	2.06308	1.19274	2.74242	4.51452	4.57465	6.6857	6.35043	5.59677	41.4976	39.4867
82	train	Vysočina	2015	-0.878138	13.2437	45.1219	12.8231	5.80812	9.64586	13.4723	16.7129	9.82281	14.6477	19.4042	21.9806	1.87828	4.82656	7.66204	10.9339	74.9931	69.5468	62.8694	64.871	0.843952	1.28849	1.19667	1.3871	3.77823	5.80661	7.48522	6.80484	32.2719	35.2016
83	train	Vysočina	2016	-33.8781	-0.756275	-39.8781	14.8231	7.80656	9.74462	12.688	14.8806	11.8377	14.1157	18.3125	20.2468	3.89294	5.48199	7.43747	9.57258	74.4605	75.4914	69.1484	68.4355	1.53515	1.48747	1.86968	1.70645	4.29449	4.54898	5.98473	6.78871	43.6434	36.3878
84	train	Vysočina	2017	-10.8781	13.1219	-29.8781	3.94498	7.13894	11.5732	12.2365	16.2645	11.9592	16.9685	17.3888	21.9903	2.55029	6.12715	7.51468	10.2645	75.3894	71.6027	74.9118	68.3871	0.892857	1.80328	3.88694	1.20161	5.39361	7.06855	5.05296	8.22097	39.5116	37.5455
85	test	Vysočina	2018	9.12186	-7.87814	33.2437	52.8231	5.86797	8.62446	15.9988	18.3677	10.2146	13.2485	22.6638	24.7226	1.25691	4.42968	8.97441	11.6161	75.1509	76.686	61.8989	62.4032	1.26843	1.47183	0.468387	1.49516	6.23992	4.57995	8.41242	8.47742	33.5576	36.4635
86	train	Plzen	2002	-41.3135	-49.6271	-44.3135	-171.472	12.5387	16.1333	15.9	16.6645	17.6129	21.03	20.7903	21.1387	8.47419	11.7967	11.771	13.6258	77.9677	72.1	79.7419	84.7742	2.22258	2.23333	2.11613	5.79677	6.40968	8.95333	6.40323	6.38065	35.3519	33.95
87	train	Plzen	2003	-27.3135	18.6865	1.68646	60.8411	13.0806	18.7467	17.1419	20.4613	19.7774	25.7033	24.1032	28.1387	8.47742	13.34	12.7871	14.7516	74.3871	64.6667	70.7419	54.2903	1.80968	2.00333	1.89677	0.670968	7.24194	10.9267	8.46129	10.5387	25.5796	27.081
88	train	Plzen	2004	-62.3135	-70.3135	-47.3135	-12.4724	9.73871	13.7233	15.6548	16.6452	15.6839	19.4433	21.1645	22.3452	5.78065	9.43333	11.2548	12.6032	74.9355	74.0333	75.9677	74.7097	1.86774	2.62667	2.73871	2.67742	6.17742	6.96	7.39677	7.76452	30.7181	34.1308
89	train	Plzen	2005	-58.3135	-31.6271	-43.6271	-60.1589	11.729	15.33	16.5548	13.9516	17.1645	21.0533	22.0806	18.6935	7.2129	10.4533	12.471	10.6323	70.7097	66	74.4516	81.6452	2.2	1.63	2.76452	2.82581	8.07742	9.24333	6.84516	5.73226	35.85	37.5
90	test	Plzen	2006	-120.314	-48.3135	17.3729	-54.1589	11.3581	16.3167	20.8258	12.9806	17.2903	22.2133	27.5839	18.7613	7.26452	11.44	15.6387	9.98065	72.3226	66.8333	63.7419	83.6452	4.92903	1.85333	2.52903	3.97419	7.09677	8.80333	11.0516	4.30323	32.1426	28.2176
91	train	Plzen	2007	-55.3135	-42.3135	-46.6271	-31.1589	12.2806	15.54	15.4839	15.5774	17.7129	20.8567	20.5	20.8581	7.71613	11.7233	11.8355	11.6484	72	78.2667	77.7097	76.9677	3.59032	3.54333	3.05806	1.87419	7.41935	6.72333	6.87097	7.0871	32.8894	36.6223
92	train	Plzen	2008	-14.3135	11.6865	4.68646	2.84111	12.5129	15.9233	16.1968	15.6774	17.8452	21.3367	21.6774	21.0516	8.29677	11.6	12.229	11.7613	74.9677	73.8	74.5806	73.6774	1.02903	0.966667	2.05161	1.45161	8.04839	7.96	7.1129	7	35.103	35.3972
93	train	Plzen	2009	-71.3135	-70.3135	-74.3135	-5.15889	11.9161	13.1233	16.0774	17.1452	16.7387	17.7667	21.1871	22.3129	7.93548	9.44667	12.229	12.8258	77.2903	77.1	76.9032	71.2903	2.26774	3.62	3.74516	1.60645	6.39032	6.04333	7.07742	8.70645	39.3456	36.5448
94	train	Plzen	2010	-79.3135	-46.3135	-38.6271	-103.472	9.11935	15.0867	18.6839	14.5355	13.1226	19.68	24.2161	19.1	6.35161	11.1867	14.2	11.6226	84.3548	70.4333	65.6129	82.1935	3.25161	1.76667	2.99355	5.66452	2.89032	7.32	8.7871	4.48387	32.9592	35.0565
95	test	Plzen	2011	-43.3135	-44.6271	-117.627	-40.1589	12.0871	14.57	13.871	16.3194	18.0226	20.0267	18.6226	21.5355	7.25161	10.53	10.2742	12.4323	64.9677	76.3333	80.2903	80.2581	2.53226	2.34667	5.72903	3.38387	8.84839	5.78667	5.10323	6.35484	40.0267	40.3228
96	train	Plzen	2012	-16.3135	-12.3135	-66.6271	-37.1589	13.1774	14.82	15.4516	17.2258	18.8452	20.05	20.4871	22.4323	8.3871	10.5433	12.0968	12.8839	65.6452	78.0333	81.1613	69.5484	0.793548	2.35667	3.21613	1.64516	8.29355	5.96	6.27097	7.34194	42.3375	39.0792
97	train	Plzen	2013	-110.314	-96.3135	23.6865	-43.1589	9.3	13.8467	18.5871	16.3968	13.6194	18.47	23.8516	21.6258	6.42581	10.1833	13.8258	12.471	86.8387	76.3	60.0968	69.7097	4.61935	3.01667	0.419355	2.92903	2.70645	6.12333	9.36774	7.35161	33.5883	32.9345
98	train	Plzen	2014	-62.3135	0.686458	-48.3135	-63.1589	10.5677	15.2133	17.6935	14.1161	15.2548	20.4367	22.7161	19.1677	6.78065	10.7533	13.6194	10.8677	75.2258	61.1	70.3226	79.2258	2.95161	0.756667	4.82258	3.5129	5.42258	8.28	6.63226	5.81935	41.8137	42.6791
99	train	Plzen	2015	-35.3135	-5.62708	53.3729	43.8411	11.2581	14.6367	19.171	20.1226	16.1806	19.48	24.829	25.7258	7.47419	10.7567	14.2774	15.1452	70.0645	73.7667	59.5161	58.4839	1.62903	1.94667	0.73871	1.8	5.56774	5.6	8.47097	8.22258	32.1205	29.7652
100	test	Plzen	2016	-22.3135	-63.3135	-63.3135	-7.15889	11.1968	14.8933	16.8677	15.8806	16.2355	19.8367	21.5355	20.8258	7.22258	11.5367	12.9419	11.7677	74.9032	81.5667	77.1935	76	1.33871	3.81333	3.62581	0.893548	6.02903	5.71	6.53548	8.17419	44.0798	40.498
101	train	Plzen	2017	-23.3135	8.68646	6.68646	-1.15889	12.5742	16.8333	16.6613	17.1839	17.6645	22.49	21.6774	22.3548	7.98065	11.9667	12.5161	12.9387	69.6452	64.8333	76.5161	73.5806	1.84194	1.52	2.50968	3.11935	7.53871	9.09333	6.90323	7.15806	39.6886	37.1249
102	train	Plzen	2018	-9.31354	-13.6271	25.3729	49.8411	14.3742	15.94	19.129	19.3323	19.3032	20.8333	24.7323	25.4452	10.0194	12.1633	14.4	14.5548	72.5161	70.6	54.6129	58.0645	1.77419	2.20667	0.370968	1.7129	8.26129	6.28667	8.64516	8.22581	33.0542	35.3711
103	train	South Bohemia	2002	-10.8791	-45.8791	-68.8791	-267.493	14.5613	17.69	17.7742	18.2645	20.0581	23.0533	23.3871	23.6935	9.03871	11.5133	12.4097	13.6161	73.2258	69.8667	73.3548	78.7419	1.48065	2.78333	4.73226	6.76452	7.19677	9.63	7.47419	6.82903	36.6278	31.2763
104	train	South Bohemia	2003	-43.8791	-3.75828	6.12086	50.5073	14.8903	20.04	18.7387	21.4387	21.0161	26.27	25.1065	28.9	8.88065	13.02	12.6677	14.1387	66.0323	61.7	64.6774	52.0968	1.79355	1.58333	1.45161	0.612903	7.98387	10.6533	7.93871	10.5258	26.1887	23.7388
105	test	South Bohemia	2004	-54.8791	-99.7583	-32.8791	21.6281	11.2161	15.1267	16.6935	18.0452	16.4	20.09	22.0839	24.3935	6.27419	9.98667	11.5452	12.5806	69.5161	71.8333	73.5484	67.7419	1.75806	4.52333	2.1871	1.67419	6.04516	6.14	7.16129	8.15161	30.2096	34.6332
106	train	South Bohemia	2005	-52.8791	-25.7583	-85.7583	-89.4927	13.1484	16.53	17.8742	15.571	18.7	21.6933	23.2548	20.7194	7.17419	10.4367	12.5806	11.1032	69.3226	65.5667	72.9355	78.0968	1.74839	2.39333	3.92581	2.43226	8.3871	8.59	7.01935	5.83226	35.7372	37.0979
107	train	South Bohemia	2006	-82.8791	-105.879	-9.87914	-78.4927	12.371	16.9267	21.4226	14.7581	17.5806	22.3633	27.9968	19.8	7.4	10.97	14.7226	10.9419	69.9355	70.3667	62.5484	75.2903	3.88065	2.45333	0.851613	2.81935	6.84516	8.73667	10.3032	4.39032	33.3991	30.7413
108	train	South Bohemia	2007	-30.8791	-16.8791	-8.87914	-18.3719	14.2	17.89	17.8839	17.3097	19.8871	23.6	23.6677	23.1129	8.07097	12.1967	12.2613	12.0097	69.4194	70.9	69.8387	72.0323	2.43871	2.25	2.29355	1.7	7.97742	8.27333	7.38387	7.65806	33.8685	34.414
109	train	South Bohemia	2008	-33.8791	-2.75828	-17.8791	-19.3719	14.0903	17.84	18.4968	17.5226	19.1774	22.9967	23.7645	23.4548	8.08065	12.3367	13.0355	11.7839	68.9032	69.3333	66.4516	69.9677	1.00968	1.33	1.74194	3.04194	7.6	7.95	7.47419	8.15806	35.083	33.4571
110	test	South Bohemia	2009	-68.8791	-138.879	-74.8791	-45.4927	13.1968	14.7967	17.9516	18.5323	17.8839	19.3167	23.8387	24.329	8.13226	10.3533	12.8194	12.7387	75.9677	75.6333	74.4839	69.3226	2.43548	2.22333	3.4871	1.32581	6.99355	6.70333	8.24194	9.07419	39.6166	37.8432
111	train	South Bohemia	2010	-94.8791	-62.8791	-80.8791	-97.4927	11.0226	16.18	19.7065	16.5129	15.1065	20.7467	25.2	21.2452	7.63871	11.2967	13.6903	12.1065	80.2258	69.2667	65.5484	76.6129	2.6129	2.50333	2.84194	4.4	4.32258	7.69667	9.19032	5.96452	33.1623	33.3257
112	train	South Bohemia	2011	-57.8791	-38.7583	-92.7583	-17.4927	13.4742	16.5033	15.6742	17.5613	19.1258	21.6867	20.5903	23.3968	6.89677	11.4833	11.3548	12.3387	63.5484	70.1333	75.7097	75.7742	2.10968	2.66333	5.31613	3.06452	9.32581	7.54	6.00645	7.41935	40.4421	36.3573
113	train	South Bohemia	2012	-27.8791	-40.8791	-95.8791	-81.4927	14.1935	16.8633	17.4613	18.0258	19.6581	21.9133	22.8903	24.2613	8.00968	11.3467	12.9548	12.1032	60.7419	69.8667	74.6774	69.0645	1.12258	2.25667	3.4129	3.76452	8.51613	6.51	6.85806	8.32903	43.333	40.4473
114	train	South Bohemia	2013	-101.879	-160.879	3.12086	-22.4927	11.3645	15.7833	19.7742	17.6097	15.7613	20.11	25.7	23.5742	7.58387	10.8667	13.2452	11.6613	80.2258	74.7	61.8387	69.5484	3.35161	2.78	0.283871	3.2129	4.03871	6.21333	10.3871	8.05484	32.838	34.5602
115	test	South Bohemia	2014	-113.879	-0.87914	-47.8791	-75.4927	11.5613	15.99	19.0871	15.6065	16.4	21.6433	24.9935	21.1387	7.07419	9.73667	13.2484	10.4839	76.9677	63.7	69.6774	77.4839	3.36774	1.45667	2.81935	3.02903	6.50968	9.18333	8.65806	5.80968	41.5746	34.4385
116	train	South Bohemia	2015	-46.8791	-22.7583	46.2417	46.5073	12.4742	15.85	20.8548	21.8	17.1355	21.32	27.3258	28.0871	7.24194	10.6767	13.8161	14.6032	69.0323	69.6	55.9032	56.9677	1.72903	1.48667	0.709677	0.580645	6.09677	7.17	9.65806	8.8129	32.2751	29.5603
117	train	South Bohemia	2016	-72.8791	-61.8791	-100.879	-1.49275	13.0839	16.6933	18.5032	17.3419	18.2581	22.1733	23.9065	23.5258	8.21935	11.7233	13.1774	11.4226	68.4839	73.9667	72.129	70.6452	2.7129	2.39667	4.23226	1.23226	6.35484	6.70333	7.00968	8.1871	43.7043	39.7245
118	train	South Bohemia	2017	-17.8791	15.1209	-25.8791	-46.3719	14.1065	18.8933	18.8452	19.2968	19.6065	25.05	24.5355	25.9	7.96129	11.84	13.3871	13.1742	68.6129	58.6667	69.2258	67.0323	1.23548	2.18	1.6129	1.94839	8.17097	9.94	7.24516	8.22581	39.5326	36.654
119	train	South Bohemia	2018	-27.8791	-65.7583	-2.87914	28.5073	15.9806	17.4567	19.8968	20.9903	21.9935	22.5433	26.2355	28.171	10.4774	12.5367	13.1968	13.871	68.129	70.1667	60.8065	56.9677	2.21935	2.39333	2.14194	0.483871	8.57419	6.68	8.85484	8.60645	33.5045	33.4049
120	test	Central Bohemia	2002	-21.3474	-20.3474	-34.6948	-105.046	12.5339	17.3017	18.7847	19.2817	21.5032	23.3633	24.3839	24.9226	10.629	12.8633	13.6839	14.5774	70.9032	71.7667	73.4839	79.9355	2.68387	4.77	3.92258	6.04839	7.4129	9	7.82581	7.20645	32.7198	31.9802
121	train	Central Bohemia	2003	-33.3474	35.3052	2.65262	56.3018	12.3644	18.3254	20.2983	20.7667	21.6	26.4633	25.3032	28.2355	9.98065	13.8733	13.8677	14.2613	66.1613	60.3333	64.9677	54.9677	1.79032	0.813333	1.82581	1.19355	8.49355	10.88	7.6129	10.1419	26.2419	28.4464
122	train	Central Bohemia	2004	-24.3474	-37.6948	-13.3474	22.3018	11.6746	14.9593	18.1983	19.7267	18.0226	22.09	24.9968	26.2774	7.71613	11.5667	13.3452	14.3032	63.3871	67.1333	63.1613	61.7097	1.23871	2.54	1.11613	2.08387	6.32581	6.67667	7.76774	7.62581	31.3308	31.6871
123	train	Central Bohemia	2005	-32.3474	-1.69477	-58.3474	-34.6982	12.8271	16.3915	18.8966	18.4683	20.5	23.0467	24.9032	22.4226	8.76129	12.0467	14.0903	12.5323	63.1613	60.5	69.2258	71.4194	1.37742	1.71333	4.36129	2.42581	8.02581	8.07	6.50645	5.80645	35.1755	41.5697
124	train	Central Bohemia	2006	-69.3474	-43.3474	45.3052	-47.6982	11.9915	16.6508	21.3119	20.0783	19.5968	23.8	29.9516	21.729	8.82258	12.2633	16.0774	12.7677	62.7419	63.1	56.3871	72.4194	3.09032	2.75333	0.36129	3.42581	7.16129	8.76667	10.7161	4.13548	28.8961	32.4756
125	test	Central Bohemia	2007	-4.34738	0.305235	-1.34738	-3.04557	14.5288	18.2305	20.0339	19.5633	21.8903	25.6067	25.5839	25.0677	10.1516	13.8533	14.4516	13.9839	58.7419	62.5667	60.0968	66.6129	1.73548	2.12	1.83871	3.23871	7.34516	7.53667	7.03871	6.92903	31.5121	33.9605
126	train	Central Bohemia	2008	-30.3474	14.3052	2.65262	6.30182	12.2288	17.0797	19.222	19.3583	20.4806	24.4167	24.8419	25.3258	8.96129	13.4267	14.0226	13.7548	69.9355	65.6667	67.3226	63.3226	2.33226	2.61667	2.68065	2.09355	6.99677	7.76333	6.45806	6.89677	33.9995	36.0797
127	train	Central Bohemia	2009	-31.3474	-52.3474	-41.6948	12.9544	14.5508	15.7034	17.9661	20	20.3355	21.2933	25.6742	26.8032	9.49355	11.7933	14.5	13.9484	65.7742	69.3	67.4516	60.4194	3.16452	2.67333	2.50323	0.716129	6.08065	5.06	6.67419	8.2129	37.6502	36.1039
128	train	Central Bohemia	2010	-80.3474	-21.3474	-12.3474	-94.0456	11.3746	15.4492	20.0661	19.96	17.1581	22.82	27.4387	23.4871	9.2871	12.2567	15.4	13.8097	72.8387	63.7667	61.4839	73.3871	3.04516	1.95333	3.02581	5.0871	2.60968	8.31	8.82581	5.87419	31.613	33.0967
129	train	Central Bohemia	2011	-11.3474	-11.3474	-99.6948	-25.6982	13.6644	16.9102	18.3322	18.5967	21.4226	24.0367	22.5387	25.3871	7.86774	13.12	13.0032	13.8677	59.871	62.2	67.4194	71.4516	1.29355	2.93	4.8871	2.3871	9.62258	8.36333	6.1129	7.38065	39.4157	39.2802
130	test	Central Bohemia	2012	-10.3474	9.65262	-37.3474	-34.6982	13.1797	17.5085	19.2695	19.9633	22.2	24.1567	25.5871	27.2065	9.55806	12.68	14.6258	13.8677	57.6452	64.5	68.4839	61.9677	2.32258	2.25333	3.14516	2.33548	8.63226	7.34667	7.46129	8.3129	39.0216	38.4234
131	train	Central Bohemia	2013	-95.3474	-128.347	4.65262	-34.6982	11.722	15.3678	19.6593	20.315	17.8935	22.2433	27.3548	25.2968	8.84516	12.2133	14.3839	13.0742	76.2903	70.4	59.0645	67.3548	4.90645	6.48667	1.36452	3.90323	4.45161	6.69	9.59355	7.49677	36.6732	34.6762
132	train	Central Bohemia	2014	-93.3474	8.65262	-13.3474	-11.0456	12.6356	15.7814	19.7847	19.365	18.7032	23.3967	27.2032	23.0097	8.52903	11.3933	15.0871	12.6	72.871	59.8333	67.1935	74.129	3.2871	0.593333	5.55806	2.95806	5.68065	8.14333	7.85806	5.18387	41.3061	36.9039
133	train	Central Bohemia	2015	-16.3474	5.65262	57.6526	21.3018	12.1136	16.0814	20.039	22.9567	19.5129	22.8533	28.7194	29.7774	8.6129	12.35	15.5452	16.6194	65.3871	67.1667	55.7742	58.4194	1.15161	2.29	0.777419	2.05161	6	6.82333	8.42258	8.21613	31.6846	31.2289
134	train	Central Bohemia	2016	-32.3474	-8.69477	-25.6948	19.9544	12.4203	17.2492	19.9119	19.9467	20.7871	24.6867	26.6323	25.4742	9.35484	13.6967	15.2065	13.0194	63.0968	67.5333	64.0323	64.8387	2.38065	2.08333	3.64194	0.825806	6.54516	6.8	6.59355	7.52903	44.1469	40.1443
135	test	Central Bohemia	2017	-5.34738	-7.34738	-13.6948	-6.04557	12.0119	17.9492	20.3712	20.3017	21.1871	26.1967	26.0742	26.5419	9.34194	13.17	14.9645	14.5452	62.4194	54.2	63.8387	63.871	1.44839	3.55333	2.15484	2.86452	8.01613	9.73667	6.65806	7.95484	39.7782	41.5441
136	train	Central Bohemia	2018	16.6526	1.65262	58.6526	58.3018	16.3847	18.5847	20.6966	22.3333	23.8581	24.79	28.271	29.5484	11.3226	13.74	14.5581	15.7613	58.7742	63.9333	50.7419	53.3226	1.19032	2.47	0.967742	0.980645	9.15806	7.47667	9.64516	8.33226	32.6863	30.3193
137	train	Prague	2002	-21.3474	-20.3474	-34.6948	-105.046	15.3774	17.5733	18.7903	19.3323	20.5903	23.0633	24.0677	24.6355	9.70968	12.07	12.9871	14.1194	74.6129	72.6	72.0323	77.4516	1.90323	2.73333	3.22903	3.94194	7.33548	8.76333	7.67097	7.07419	31.0893	31.6723
138	train	Prague	2003	-33.3474	35.3052	2.65262	56.3018	15.2548	20.0767	19.0613	21.0806	20.8323	26.05	24.8226	27.8355	9.32903	12.77	13.3129	13.7677	68.2581	60.7667	66.0968	53.7419	2.29355	0.853333	2.4	0.519355	8.56774	11.11	7.64516	10.0419	27.0072	26.9836
139	train	Prague	2004	-24.3474	-37.6948	-13.3474	22.3018	11.9	15.8067	17.7032	19.0935	16.9742	20.8667	23.4903	25.0581	6.30968	10.4567	12.029	13	69.5806	71.4	69.1935	64.5161	1.53871	3.57333	1.59355	1.74194	6.7129	7.08333	7.93548	7.81935	31.6296	34.3204
140	test	Prague	2005	-32.3474	-1.69477	-58.3474	-34.6982	13.9645	16.5467	18.4935	16.5871	19.2548	21.74	23.8323	21.5774	8.3	10.9033	12.9645	11.5452	66.3871	66.2	71.6129	73.871	2.66452	2.17333	4.02903	1.77742	8.49032	8.6	7.00645	6.24839	34.5897	39.8904
141	train	Prague	2006	-69.3474	-43.3474	45.3052	-47.6982	13.4839	17.6767	22.3806	15.7871	18.829	22.93	28.971	20.8742	8.03226	11.24	15.2258	11.9935	63.7419	65.8333	59.4839	74.8065	3.12903	1.96333	0.925806	2.98065	7.25806	9.12	10.8581	4.2129	26.7642	26.6284
142	train	Prague	2007	-4.34738	0.305235	-1.34738	-3.04557	15.1097	18.6267	18.6774	18.3484	21.1258	24.4467	24.3903	24.0355	8.67742	12.7833	13.5	13.0774	62.9677	68.3333	65	68.3548	1.94194	2.57667	2.28387	2.66129	7.82258	7.87333	7.20968	6.82581	30.7778	33.4267
143	train	Prague	2008	-30.3474	14.3052	2.65262	6.30182	14.0935	17.7433	18.5194	18.2194	19.5452	23.2233	23.9258	24.129	8.09677	12.1333	12.9032	12.5935	72.2903	68.4667	67.871	65.6774	1.77097	2.2	2.37742	2.21613	7.70968	8.18	6.8	6.87742	33.1042	33.8625
144	train	Prague	2009	-31.3474	-52.3474	-41.6948	12.9544	14.171	15.12	18.6258	19.6032	19.2871	20.11	24.5516	25.629	8.49355	10.4533	13.6613	13.1742	68.871	74.8667	70.6774	63.5161	2.69355	2.99667	2.08065	0.729032	6.27097	5.52	6.95161	8.59032	36.3897	39.5383
145	test	Prague	2010	-80.3474	-21.3474	-12.3474	-94.0456	11.8484	17.2467	20.9419	17.7129	15.9645	22.0233	26.6097	22.7387	8.59677	11.4333	14.5032	13.4226	78.0645	67.6667	64.7097	74.7097	2.52581	1.92	4.12903	3.98387	3.19355	8.27667	8.63548	5.28387	30.6077	31.2928
146	train	Prague	2011	-11.3474	-11.3474	-99.6948	-25.6982	14.2194	17.6467	16.8484	18.6355	20.229	23.13	21.7452	24.2903	6.81935	12.1267	12.0677	13.3065	62.0645	66.9667	71.9677	73.4839	1.07742	2.17667	4.65484	1.76129	9.53226	7.90333	5.29355	6.57419	39.0828	38.3749
147	train	Prague	2012	-10.3474	9.65262	-37.3474	-34.6982	15.2194	17.4867	18.5613	19.4194	21.2194	23.2767	24.671	25.9677	8.18387	11.29	13.6806	13.2774	61.6452	68.1333	71.5806	63.7742	0.848387	1.24	3.60645	2.01935	8.38387	6.84	6.67742	7.85806	36.734	36.0355
148	train	Prague	2013	-95.3474	-128.347	4.65262	-34.6982	12.0323	16.1933	20.1871	18.2032	16.7484	20.89	25.9065	24.071	7.60968	10.73	13.271	12.0903	81.1935	76.3	64.3548	68.9677	4.23226	5.01	1.6129	4.67097	4.1871	6.87	9.91613	7.98387	38.8685	35.4569
149	train	Prague	2014	-93.3474	8.65262	-13.3474	-11.0456	12.2548	16.4533	19.8484	16.4548	17.2677	21.8467	25.5355	21.5839	7.20645	9.97333	13.9258	11.4258	76	64.0667	68.9677	72.6774	3.8871	0.706667	5.26129	1.76452	6.31935	8.40333	7.80968	5.3129	40.8066	36.0316
150	test	Prague	2015	-16.3474	5.65262	57.6526	21.3018	13.2226	16.2867	20.9194	22.3968	18.1581	21.5233	27.0452	28.0387	7.7129	10.9267	14.3258	15.6903	66.0323	68.6667	57.4839	59	1.31613	1.12667	1.54194	2.02581	6.39032	6.62	8.5871	8.63548	31.393	29.4029
151	train	Prague	2016	-32.3474	-8.69477	-25.6948	19.9544	14.1258	17.6867	19.3742	18.4806	19.4774	23.03	25.071	24.3387	7.81613	12.2967	13.7806	12.1484	66.5484	73.1	68.3226	65.3871	1.77742	2.46333	1.71613	1.50645	7.36774	7.01	6.76774	7.86129	44.0576	40.8617
152	train	Prague	2017	-5.34738	-7.34738	-13.6948	-6.04557	14.4387	18.83	19.3065	19.3258	19.9742	24.82	24.9194	25.0387	8.16452	11.7633	13.871	13.5968	66.129	59.5	66.6774	66.5484	1.07097	3.88333	2.13548	2.53548	8.55161	9.95	6.76129	8.02258	39.7907	38.3361
153	train	Prague	2018	16.6526	1.65262	58.6526	58.3018	16.9387	18.1	21.4129	21.8677	22.5065	23.1967	27.4097	28.3032	9.89355	12.7267	13.7613	14.9516	62.2581	68.3333	51.3226	54.9355	0.967742	3.48333	0.522581	1.61613	9.42258	7.65333	9.85806	8.69355	32.5623	34.1182

## Sheet: Table S2
Table S2. The predicted and observed yields of Grain Maize in different regions of Czechia in 2002-2018
No.	Dataset	Region	No.	1	2	3	4	5	6	7	8	9	10	11	12	13	14	15	16	17	18	19	20	21	22	23	24	25	26	27	28	29	30	31	32	33	34	35	36	37
			Climate factor	water deficit	water deficit	water deficit	water deficit	water deficit	Temp. Mean	Temp. Mean	Temp. Mean	Temp. Mean	Temp. Mean	Temp. Max	Temp. Max	Temp. Max	Temp. Max	Temp. Max	Temp Min	Temp Min	Temp Min	Temp Min	Temp Min	humidity	humidity	humidity	humidity	humidity	precipitation	precipitation	precipitation	precipitation	precipitation	Sunshine	Sunshine	Sunshine	Sunshine	Sunshine	Observed Yield (t/Ha)	Predicted Yield (t/Ha)
			Units	(mm)	(mm)	(mm)	(mm)	(mm)	（℃）	（℃）	（℃）	（℃）	（℃）	（℃）	（℃）	（℃）	（℃）	（℃）	（℃）	（℃）	（℃）	（℃）	（℃）	(%)	(%)	(%)	(%)	(%)	(mm)	(mm)	(mm)	(mm)	(mm)	(hours)	(hours)	(hours)	(hours)	(hours)
			Month	05	06	07	08	09	05	06	07	08	09	05	06	07	08	09	05	06	07	08	09	05	06	07	08	09	05	06	07	08	09	05	06	07	08	09
1	train	Liberec	2002	-15.4316	-0.431563	-11.8631	-87.8631	-53.4316	14.6484	16.4067	17.8935	18.4548	11.4067	20.129	22.01	23.2968	24.4516	16.7967	9.51613	10.93	12.5548	13.5935	6.64333	76.6774	74.2	76.3871	80.0968	83.8	1.4	1.73	2.84194	7.18387	2.16	7.20323	7.65	6.65161	7.62903	4.55667	7.80146	7.13305
2	train	Liberec	2003	-33.4316	24.1369	-20.4316	32.1369	1.56844	14.429	18.6667	17.9645	19.1	13.1	20.6323	25.1733	24.0677	26.8452	19.69	8.6129	12.06	12.2097	11.8742	8.22	69.3226	60.7667	69.0645	59.7097	71.5667	2.18065	0.883333	2.76452	0.467742	1.75	7.83226	9.46333	7.20968	9.64194	5.97	3.79246	4.24561
3	train	Liberec	2004	-52.4316	-26.8631	-22.8631	-23.8631	-31.8631	11.1516	15.13	16.9258	18.0903	12.78	16.5742	20.9133	23.0581	24.7065	18.8633	5.66452	9.94333	11.7065	12.4065	8.07333	75.2903	75.2667	75.6774	72.9677	77.8	2.16452	2.36333	2.76774	1.70323	1.73333	5.31935	5.98333	7.11613	7.97419	6.40667	2.80239	4.35199
4	train	Liberec	2005	-65.4316	-39.4316	-100.863	-66.4316	-62.4316	12.8581	15.49	17.871	15.4871	14.3167	18.9419	21.0733	23.8484	21.7516	20.8933	7.63871	9.24667	12.7516	10.3516	9.41667	72.2258	70.4667	76.1613	80.5161	79.4333	2.26452	2.56	3.99677	2.94839	2.16667	7.31935	8.32667	6.53226	6.78065	7.49	5.21549	4.99442
5	test	Liberec	2006	-49.4316	-19.8631	58.1369	-151.432	-3.43156	12.5	16.8767	21.9484	15.1548	16.2367	18.6548	23.24	29.3484	20.1161	21.9133	6.92581	10.3933	14.1323	11.8645	11.72	67.7097	68.5333	59.0968	82.9677	73.1	2.61935	2.79667	1.16774	7.57419	1.12333	6.95484	8.31333	10.9548	3.95161	7.37667	4.74511	6.04212
6	train	Liberec	2007	-15.4316	-25.8631	-48.8631	-48.4316	-84.8631	14.1935	17.5	17.4839	16.9452	11.2133	20.4806	23.7433	23.4581	23.9871	16.54	7.57097	11.6933	12.2806	10.9839	7.31667	65.1613	70.8667	70.6129	73.2581	80.8667	2.75484	3.13667	2.58065	2.06452	3.59	7.39355	6.9	6.18065	6.86452	4.23667	5.02549	6.35899
7	train	Liberec	2008	-19.4316	-2.43156	-26.8631	-52.8631	-17.8631	13.1645	16.86	17.2484	16.829	11.72	19.7935	23.0967	23.3742	22.8	17.39	6.80968	10.19	11.6194	11.6935	7.34	70.2581	66.4	73.6774	74.4194	81.6667	0.790323	1.71667	3.73548	2.71613	0.986667	8.17419	7.49667	6.46129	6.40968	4.85	5.0588	5.145
8	train	Liberec	2009	-75.4316	-87.4316	-82.4316	-18.4316	27.5684	12.7065	13.8867	17.3194	17.4968	14.03	18.4161	19.22	23.4355	24.0355	20.12	6.70323	9.30667	12.3935	11.5839	8.90333	66.2903	73.0333	67.4516	63.871	72.9333	4.63871	3.56333	3.31935	2.79032	1.02667	6.54839	4.61667	6.05806	8.64839	5.53667	5.21832	5.35764
9	train	Liberec	2010	-119.432	-23.4316	-36.4316	-258.432	-145.432	10.571	15.76	19.5258	16.4516	11.07	14.8387	21.2967	26.1548	21.1774	16.0133	6.96452	9.16333	12.8968	12.0226	6.93	75.8387	65.5667	61.6452	72.1935	74.2333	4.62581	2.63333	5.05161	13.3548	5.66667	2.10323	8.04667	8.26774	4.62903	4.67333	4.26102	5.04724
10	test	Liberec	2011	-33.4316	-50.8631	-183.432	-66.4316	-34.4316	13.1258	16.3033	15.8419	17.4226	14.1633	19.5258	22.2833	20.4645	23.4	20.1233	6.27419	10.5933	11.4097	12.4903	9.14667	59.4516	66.8333	72.4839	72.5484	74.6	2.12903	2.75667	9.67097	2.79032	2.17333	9.39355	7.17	5.19677	6.2129	6.28	5.97188	7.91797
11	train	Liberec	2012	-13.4316	-12.4316	-102.863	-66.4316	-21.4316	14.2645	15.8633	17.7226	17.2355	13.0567	20.3032	21.2033	23.6677	23.8323	19.0367	7.77742	10.3933	12.4839	11.4935	7.63	57.4839	66.7667	68.3226	66.4839	72.4333	1.19355	2.13667	4.87419	4.49677	1.19	7.96452	5.43667	6.85806	7.43226	5.99	5.66588	6.11691
12	train	Liberec	2013	-88.4316	-138.432	-41.4316	-22.8631	-69.8631	12.0419	15.5433	18.6032	17.2355	11.5633	16.7355	20.6	25.3129	24.3032	16.73	7.67742	10.4767	12.0387	11.1677	7.58667	75.8387	75.4333	67.4194	68.3548	81.6333	4.29677	6.72	4.05161	2.08387	3.15667	4.25161	5.35	8.19355	7.26452	3.58333	2.02143	2.72758
13	train	Liberec	2014	-105.432	-8.43156	-33.4316	-42.4316	-41.8631	11.871	15.52	19.1161	15.9742	14.2433	16.8226	21.66	25.4903	21.4613	19.5533	7.12903	9.48	13.8194	10.9419	10.4167	74.6452	64.2333	70.7419	74.2258	84.4	4.23871	1.49667	3.26129	2.84839	2.56	4.62581	6.82333	7.06452	4.96774	4.51667	4.94214	5.47868
14	train	Liberec	2015	-23.4316	-25.4316	3.13687	14.5684	7.56844	11.971	14.9033	19.1903	21.171	12.6633	17.5258	20.7133	25.7613	27.9516	18.6	5.68387	9.34333	13.0355	14.629	8.03	63.5161	68.6	59.3871	59.9677	73.3667	0.974194	3.07667	1.48065	2.4871	1.20667	6.79355	6.04	7.91935	8.18387	5.26	0.826425	1.76602
15	test	Liberec	2016	-16.4316	-56.4316	-74.4316	-20.4316	8.56844	13.2387	16.56	17.771	16.0452	15.45	19.2581	22.16	23.5161	22.2161	22.27	7.00968	10.9267	12.3065	10.3032	9.78333	63.2581	70.5667	69.3871	71.129	72.3333	1.0871	4.85333	4.28387	1.50323	2.69667	6.79032	6.14667	6.13871	6.2	7.07333	5.77309	4.13221
16	train	Liberec	2017	-26.4316	-32.4316	-78.4316	-46.4316	-49.8631	13.2323	17.2467	17.6484	17.5484	11.49	18.7645	23.1433	23.3258	23.1613	16.19	7.55806	10.5267	12.1323	12.1355	7.36333	65.7419	61.1	70.4839	71.2903	79.9	1.4	3.23667	5.65161	3.29355	3.01333	7.28387	8.63	5.92258	7.0129	3.40333	4.91211	5.54695
17	train	Liberec	2018	8.56844	-0.431563	43.1369	47.5684	6.56844	15.5065	16.6	19.0323	20.0806	14.2067	22.0452	22.83	26.0355	27.7968	20.7767	8.79677	11.5467	11.3258	13.1968	8.74333	63.1613	66.7	54.9677	53.7097	64.7667	1.94516	2.28667	0.867742	0.890323	1.19333	8.69677	5.95667	9.20968	7.85161	6.31	3.55303	3.40941
18	train	Moravian-Silesian	2002	-40.0327	-63.0655	-42.0327	-56.0655	-77.0327	13.8823	14.9233	16.9468	16.6274	9.65833	19.2242	19.935	22.5565	21.5419	14.2267	9.18065	10.35	12.0516	12.8597	6.335	74.8387	77.2333	75.9032	80.3065	83.3	4.31129	5.045	3.19839	6.14355	3.79	7.31613	7.685	7.89355	6.38871	4.53	7.47377	7.56939
19	train	Moravian-Silesian	2003	-54.0327	18.9345	-46.0327	4.96727	3.96727	13.3177	17.15	16.279	17.5935	11.6617	19.3435	23.3233	21.4403	24.5	18.1233	8.2871	11.5883	12.1968	12.1161	6.82	75.6935	67.5167	79.2903	67.3387	73.2167	2.48548	1.06	5.22581	0.932258	2.13167	7.69355	9.55667	5.77903	9.85968	6.63167	3.74704	4.72067
20	test	Moravian-Silesian	2004	-41.0327	-65.0655	-28.0327	21.9673	6.96727	9.00645	13.2033	15.1242	16.1419	10.7117	14.2935	18.3917	20.5823	21.9565	16.0367	4.68871	9.23667	11.0081	11.4645	6.37	75.2581	78.4167	76.9194	73.3226	76.8333	1.88548	4.45333	2.5	1.75161	1.62167	5.80645	5.485	6.56129	7.49516	5.91833	3.11068	3.18206
21	train	Moravian-Silesian	2005	-78.0327	-39.0327	-76.0655	-96.0327	-24.0327	11.1855	13.4233	16.4339	13.9823	12.0083	16.8468	18.43	21.5355	18.779	17.3483	6.1129	9.01167	12.2016	10.429	8.15	74.2903	77.35	78.1774	82.8065	82.1	3.90323	3.44167	4.28226	5.72097	1.97333	8.07419	7.39667	7.10806	5.62097	6.3	5.10347	5.97966
22	train	Moravian-Silesian	2006	-66.0327	-65.0327	27.9673	-98.0327	-5.03273	10.4645	14.9183	19.5194	13.7113	13.605	15.5081	19.8317	25.4887	18.1081	19.515	6.1	10.185	13.7532	10.5419	9.065	74.9355	77.0167	63.871	84.871	78.1667	4.14194	3.63833	1.16452	6.1871	1.25	5.5871	7.21333	10.729	4.12258	7.30833	4.51681	4.84047
23	train	Moravian-Silesian	2007	-16.0327	-19.0655	-23.0655	-13.0655	-153.065	12.3565	15.855	16.5065	16.0081	9.47333	17.5177	21.28	21.9113	21.3968	13.9267	7.28065	11.3367	11.5629	11.3516	5.865	71.4516	71.4667	69.2419	72.8548	82.0667	2.15645	3.39833	3.00645	2.32581	8.54	6.58387	6.53667	7.1629	6.47258	4.59833	4.70736	3.05379
24	train	Moravian-Silesian	2008	-70.0327	-35.0327	-94.0655	-55.0327	-81.0655	11.1161	15.2667	15.6613	15.5145	10.1233	16.1274	20.6567	20.4323	21.0081	13.9417	6.55968	10.57	11.5694	11.0887	7.03333	76.7581	72.0833	74.5645	73.1613	81.1833	2.45323	3.645	6.50323	3.97903	3.445	6.28871	7.675	6.40484	7.41935	4.43667	5.25746	4.90382
25	test	Moravian-Silesian	2009	-40.0327	-135.033	-70.0327	-11.0327	28.9673	11.0581	12.9533	16.8355	16.3323	12.9383	16.6435	17.3533	22.3371	21.5806	18.1217	6.1	8.77667	12.129	11.7919	8.95	74.5968	82.8833	74.6935	74.7903	79.6167	3.0871	5.25667	4.11774	2.35968	1.125	6.46452	3.85667	7.82419	7.82903	5.71833	5.16071	5.39369
26	train	Moravian-Silesian	2010	-269.033	-74.0327	-115.033	-93.0327	-101.033	9.45645	14.3267	17.6806	15.4081	9.77333	13.1081	18.64	22.5694	20.2935	13.79	6.75161	10.03	13.1758	11.4452	6.69167	89.129	77.15	74.4839	81.2581	85	13.271	5.115	6.77258	5.67903	4.93167	1.84032	7.05167	7.46129	5.84032	4.04167	4.47316	4.75548
27	train	Moravian-Silesian	2011	-77.0327	-73.0327	-149.033	-40.0327	14.9345	10.8661	14.4833	14.4871	16.5242	13.2017	16.4613	19.0667	18.6355	21.6887	18.5917	5.39677	10.31	10.9403	12.1081	8.70833	69.2742	79	81.8548	75.7581	76.35	4.08548	4.83667	8.28065	3.12419	1.22667	8.73548	4.81333	4.61935	7.41935	7.33167	5.98661	4.86382
28	train	Moravian-Silesian	2012	-22.0327	-44.0327	-34.0327	3.93455	-29.0327	12.3065	15.2133	17.3435	16.7194	12.1617	18.0435	19.9567	22.7065	22.2274	17.1833	6.88871	10.7017	12.8516	11.9339	7.84333	65.7742	77	70.6774	68.4355	78.65	1.85806	5.74167	4.01452	2.19839	2.92167	7.62258	6.02833	6.46774	7.15484	5.20667	5.75386	4.7355
29	train	Moravian-Silesian	2013	-96.0327	-121.033	19.9673	12.9673	-74.0327	10.7387	14.1217	17.05	16.4887	9.38833	15.3516	18.3117	22.2242	21.9581	13.7933	6.98871	10.52	11.7774	11.5468	5.62	78.6935	82.5	68.9355	68.5806	82.9333	3.90645	6.24833	1.68065	2.27581	4.825	4.3129	4.875	8.62742	7.69194	3.80167	2.8807	1.74938
30	test	Moravian-Silesian	2014	-126.033	-50.0327	-52.0655	-82.0327	-84.0327	10.229	13.55	17.1065	14.0984	12.4417	14.9177	18.5783	22.4694	18.95	16.57	5.85645	8.83167	12.529	10.5274	9.39	77.6935	69	74.6613	81.371	84.0167	5.68871	2.695	4.5871	4.30806	4.60667	5.52258	7.28167	7.12581	4.90968	4.71667	5.29253	5.26238
31	train	Moravian-Silesian	2015	-60.0327	-20.0327	40.9673	38.9673	8.96727	9.97097	14.1383	18.2597	19.6581	11.7483	14.5758	19.0133	24.0677	25.7516	16.555	5.84355	9.31	12.3484	14.1145	8.08167	75.3065	72.1	64.1452	63.5968	80.3	3.59516	1.98333	1.82903	2.14032	1.83	5.05484	6.79667	8.81613	8.50323	4.13667	1.90672	2.48454
32	train	Moravian-Silesian	2016	-43.0327	-20.0655	-91.0655	-32.0327	16.9345	11.4613	15.795	16.6516	15.0984	14.0967	16.7161	21.265	22.0016	20.1581	19.4017	6.7	10.905	12.2613	10.7952	9.77	73.2258	73.65	77.8387	79.0484	78.85	2.05323	2.255	5.67742	2.85161	1.79	6.39677	8.08167	6.27742	6.92581	6.87167	5.85756	7.18308
33	train	Moravian-Silesian	2017	-43.0327	-12.0655	-29.0327	-14.0655	-118.033	11.3758	16.0367	16.35	17.3419	10.3117	16.5242	21.5583	21.9355	23.4081	14.0967	6.89032	10.6167	11.8871	12.3532	7.59167	76.4839	66.5667	72.129	71.8226	86.45	3.1871	2.82	3.31935	2.59839	7.73833	6.13548	9.01833	6.93387	7.54355	2.845	4.8852	5.1278
34	train	Moravian-Silesian	2018	-0.0327267	-53.0655	-28.0327	24.9673	-24.0327	14.1726	15.0533	17.0452	18.7548	13.285	19.3694	19.88	22.1613	24.4355	18.5367	9.35	11.505	12.3242	13.6565	9.18	69.0968	79.6	72.7097	66.9677	73.8167	2.90484	5.07167	5.80484	1.95323	2.72333	7.98871	4.705	7.3	8.98226	6.70333	3.61718	5.65438
35	test	South Moravian	2002	-4.00786	-17.0079	-15.0157	-37.0079	-36.0079	17.0516	19.1333	20.8871	20.429	13.99	21.8742	24.2433	26.9	25.4097	18.7	12.0968	12.9967	14.9032	15.5452	9.63667	70.4839	67.6333	64.7097	71.871	72.2667	1.47742	2.72333	1.87097	2.94194	1.30667	7.6871	9.71333	9.29032	7.13548	5.81667	7.62939	9.3726
36	train	South Moravian	2003	-25.0079	55.9843	13.9921	61.9921	18.9921	17.1613	21.3167	20.3355	22.5065	15.3667	22.5419	26.5933	25.8968	29.2129	21.0633	11.3935	14.7333	14.3065	15.4161	9.60333	65.9677	61.7333	65.9355	54.6452	66	2.99355	1.99333	2.13226	1.19355	0.81	9.50645	10.64	7.42581	10.3323	7.16	5.75314	6.65595
37	train	South Moravian	2004	-8.00786	-32.0079	8.99214	40.9921	7.99214	13.0935	17.0033	19.1968	20.2	14.8967	18.1774	21.85	24.6032	26.4065	20.4567	7.5129	11.6233	13.3129	14.1355	9.43333	68.3871	74.6	69.4516	63.7419	67.4	0.503226	2.58333	1.13548	0.670968	1.33	6.46452	6.59667	7.44839	8.2871	6.89667	5.52439	6.1455
38	train	South Moravian	2005	-53.0079	-4.01573	-31.0079	-61.0079	-6.00786	14.8032	17.4833	19.0581	17.5161	15.4567	19.8903	22.2467	24.2548	22.5097	20.41	8.68387	12.0167	14.1	12.4194	11	67.2258	65.7333	70.1613	67.3226	68.4	3.13548	1.95	2.9871	2.75484	0.7	8.97419	9.01667	7.09355	6.91935	6.37333	7.72726	10.0614
39	train	South Moravian	2006	-50.0079	-25.0157	57.9843	-86.0079	17.9921	13.9452	18.3067	22.7032	16.2516	16.5	18.7806	23.0067	28.4065	21.0806	22.1333	8.7129	12.34	15.9548	11.9613	11.1133	63.2903	62.8333	54.6774	72.5161	65.5333	2.55161	2.33667	2.39032	4.66129	0.856667	6.39677	8.37	10.7484	5	8.03	6.55965	5.80288
40	test	South Moravian	2007	17.9921	1.99214	23.9921	28.9921	-67.0079	15.6516	20.0933	21.1129	20.8774	13.2967	20.9548	25.6167	26.8548	26.7839	18.2033	9.71613	14.16	14.5903	14.9065	8.74333	59.6129	64.1333	58.4516	59.3871	72.4333	1.40645	3.12333	1.14839	1.17742	2.93333	7.6129	7.98333	8.67419	8.01935	5.35333	6.66292	5.00562
41	train	South Moravian	2008	-27.0079	18.9921	4.99214	22.9921	-3.00786	15.4774	19.9333	20.3226	19.9387	14.42	20.5161	25.3767	26.1194	25.7548	19.07	9.34839	13.79	14.3065	13.9323	10.0367	64.7419	61.5333	62	62.129	68.4667	2.24516	1.19667	2	1.43871	1.28	7.08387	7.93667	7.02258	7.54839	5.18	8.63967	8.58396
42	train	South Moravian	2009	-0.0078633	-49.0157	-69.0079	7.99214	37.9921	15.4484	17.3133	20.4484	20.8839	17.2233	20.8258	22.1167	26.4065	26.4484	22.8333	9.5871	12.2233	14.1613	14.8065	11.88	63.2903	69.6667	68.1613	63.5484	68.0667	1.20968	3.31667	3.87419	0.829032	0.483333	7.4	5.94333	8.79677	8.63871	6.3	7.93433	8.44892
43	train	South Moravian	2010	-120.008	-54.0079	-50.0157	-63.0157	-55.0079	13.6065	18.5167	21.8677	19.2258	13.4733	17.4419	22.9233	27.2613	24.1548	18.05	10.4581	13.35	16.2194	14.0645	9.31333	79.7742	69.5	66.9032	75.0645	77.1	3.93548	2.81	4.39032	2.54839	2.30667	3	7.46	8.45161	7.20323	4.58667	7.44409	6.87719
44	train	South Moravian	2011	-20.0079	9.98427	-18.0079	16.9843	24.9921	15.1097	19.1767	18.8516	20.5194	17.2	20.6452	24.5133	23.671	26.4065	23.5233	8.25484	13.9133	14.1161	14.729	11.3167	61.4516	64.5333	66.2581	66.5161	64.9	1.42581	2.05333	2.9871	1.14839	1.02	9.52903	7.43	6.10968	7.8871	7.93333	9.38052	7.80601
45	test	South Moravian	2012	10.9921	-24.0079	-26.0157	25.9843	16.9921	16.871	19.64	21.0387	21.2871	16.19	22.8774	24.7267	27.2452	27.5548	21.5833	10.3903	13.8833	15.4774	14.7968	10.94	52.8065	65.8667	65.7097	58.6129	65.9333	0.906452	2.83	1.67419	1.86774	0.99	8.78065	7.23667	6.88387	8.40645	6.67333	9.17548	8.99166
46	train	South Moravian	2013	-61.0079	-86.0079	45.9921	2.99214	-22.0079	14.1032	17.9467	22.2129	20.9032	13.82	18.4581	22.6533	27.9258	26.6129	18.58	9.66774	13.0033	15.3	14.9613	9.4	73.9032	71.6667	55.3226	59	71.4333	4.43871	3.41667	0.13871	2.92903	2.00333	5.15161	6.64333	11.0419	8.51935	4.59	6.35692	5.18186
47	train	South Moravian	2014	-40.0079	17.9843	-4.00786	-52.0157	-111.008	14.4419	19.0633	21.7677	18.0323	15.6567	19.3839	24.45	27.6355	22.8903	20.0067	9.39355	12.2833	15.7742	13.4	11.7533	66.3548	53	62.0968	74.8387	79.4	2.47097	1.01667	3.12903	3.89677	4.04	5.26774	7.31333	6.41613	4.53226	3.88333	9.02261	8.16098
48	train	South Moravian	2015	-2.00786	37.9921	54.9921	2.99214	23.9921	14.5645	19.0167	22.9355	23.971	16	19.0032	24.3233	29.4032	29.829	20.81	9.38065	12.85	15.6581	17.5484	11.6567	66.7742	61.1333	55.2258	56.3226	66.0667	1.56129	1.4	1.27419	2.83871	0.516667	5.12581	8.35	9.52903	8.7129	4.98333	5.31399	6.09302
49	train	South Moravian	2016	-19.0079	22.9921	-42.0079	-3.00786	51.9921	15.5968	19.8467	21.2839	19.5839	18.2733	20.5129	25.0367	27.1323	24.9129	24.5333	9.70968	13.6833	15.3419	14.0387	12.06	65.9032	66.9333	66.0968	67.7742	66.5333	1.43226	2.48333	3.28387	1.97097	0.366667	7.19355	8.24	7.86774	7.9129	7.53333	9.32981	8.91907
50	test	South Moravian	2017	-6.00786	47.9921	2.99214	47.9921	-35.0079	15.9806	21.0233	21.2065	22.0806	14.0967	21.4774	27.28	26.9355	28.2581	18.6367	9.77419	13.7867	14.9968	15.5516	9.88333	62.7097	53.4	60	57.5484	75.5333	1.43548	1.16667	2.6	0.9	2.00333	8.72903	10.6667	7.55161	8.99677	3.65667	7.5705	7.55827
51	train	South Moravian	2018	21.9921	13.9921	35.9921	63.9921	-30.0079	18.5226	20.3933	22.3452	23.9194	17.2633	23.9419	25.8733	28.1677	30	22.59	12.6645	15.0833	15.7355	17.4484	11.8	61.7742	59.6	54.7742	51.4839	66.4667	1.55484	1.04667	1.99355	1.02258	2.87333	9.18387	6.49667	7.87097	9.40645	7.70667	5.7873	5.01346
52	train	Usti nad Labem	2002	-34.1464	-14.2927	-23.2927	-97.2927	-45.1464	12.4774	14.9933	15.7452	16.7032	9.54	19.4226	21.5133	22.2161	23.171	14.7233	8.45484	10.7467	11.6677	13.2065	6.78667	79.3871	76.1667	79.0968	81.5806	83.3333	1.19677	2.84333	2.20968	4.02581	1.21	6.69677	8.16333	7	7.60323	5.62333	7.72012	6.19766
53	train	Usti nad Labem	2003	-17.1464	39.8536	-20.1464	47.7073	30.8536	12.3677	17.1	16.2194	18.7161	12.1233	19.3742	24.4067	22.6968	25.8645	18.1533	8.05484	12.4933	12.3548	14.1774	8.41667	72.9032	67.2	74.1935	58.8387	72.4667	1.45806	1.30333	3.09355	0.209677	0.683333	7.63548	10.6667	7.46774	10.371	7.00333	5.45159	6.69496
54	train	Usti nad Labem	2004	-63.1464	-32.1464	-17.2927	1.70726	2.85363	8.61613	13.09	14.7355	16.2774	11.33	14.3613	19.4967	21.5323	22.9645	16.6367	5.1129	9.33333	10.8355	12.2968	7.68	79.4194	76.7333	77.5484	73.3548	77	2.35806	1.64	2.23226	1.34516	0.88	5.32258	5.99667	7.22903	7.27419	6.91667	5.03379	5.36506
55	test	Usti nad Labem	2005	-51.1464	-21.2927	-51.1464	-46.1464	-18.2927	10.7387	13.3933	15.7871	13.4806	12.6367	17.6645	19.5233	22.0742	19.1903	18.59	6.58387	9.32333	11.9194	10.3194	9.28	75.3226	73.5333	79.2258	82.5484	82.1667	2.58387	2.23	4.54194	2.95161	1.13667	7.57419	9.08	6.84194	6.34839	7.50333	7.35138	6.57109
56	train	Usti nad Labem	2006	-41.1464	-1.29274	55.8536	-38.1464	6.85363	10.6581	15.0267	20.5613	12.8548	14.03	17.0871	21.75	28.171	18.5387	20.0667	6.78387	10.4333	15.5613	10.1129	10.1933	69.9355	71.4667	62.2581	85.0645	80.4333	1.71935	1.61	1.55161	2.4	0.786667	7.04839	9.51	10.8935	4.61613	7.63333	6.31667	6.01443
57	train	Usti nad Labem	2007	-34.1464	-28.1464	-15.1464	-48.2927	-76.1464	12.3806	15.7867	15.5581	15.3484	9.45667	19.7032	22.6867	21.7194	21.7194	13.9533	7.72258	11.5467	12.0226	11.4	6.57333	72.3226	77.8667	77.8065	78.4839	88.2	4.6	2.23	3.06452	2.06452	2.95	8.14516	7.91	7.10645	7.34516	4.58333	6.46538	7.93695
58	train	Usti nad Labem	2008	-11.1464	3.85363	-0.146371	-4.29274	-2.29274	11.929	15.07	15.6516	15.2355	9.85667	18.6065	21.71	21.8581	21.3613	14.41	8.00645	11.2267	11.6677	11.4065	7.26667	74.6774	74	77.4194	77.871	86.6333	1.18065	1.49667	2.44839	2.23871	1.71	8.09355	8.32333	7.19032	7.01613	4.69667	8.03436	6.71776
59	train	Usti nad Labem	2009	-55.1464	-52.1464	-49.2927	-18.2927	31.8536	11.2677	12.1767	15.8516	16.7097	13.0267	17.5903	17.7967	22.4387	23.1968	18.36	7.16452	8.78667	12.3613	12.5194	9.82	77.1613	81.3	76.3871	70.6774	80.7667	3.41935	2.17333	2.93548	1.67097	0.7	6.87742	5.46333	6.98387	9.65484	6.5	7.51558	6.86271
60	test	Usti nad Labem	2010	-82.1464	-14.1464	-48.1464	-152.146	-100.146	8.45484	14.46	18.3613	14.8	9.22667	13.2903	20.4667	24.7419	20.1839	13.3867	5.57742	10.1	14.1935	11.6484	6.92	84.4839	70.5667	68.0968	82.7419	87.4	2.81935	1.60667	4.60645	6.47742	3.76	3.22581	8.82333	8.69355	5.43871	4.33	6.89914	6.44392
61	train	Usti nad Labem	2011	-32.1464	-19.2927	-86.2927	-38.1464	-0.292742	11.7645	14.6633	13.9613	15.8645	13.43	19.0129	21.1767	19.4452	22.0742	18.79	7.02903	10.5467	10.5323	12.271	10.0533	64.5806	72.0333	77.8387	77.2581	78.1333	2.00968	1.95	5.45161	1.92903	1.75667	9.43226	7.56	5.87419	6.87097	7.25333	8.83812	7.20403
62	train	Usti nad Labem	2012	-12.1464	-5.14637	-63.2927	-19.1464	4.85363	12.7323	14.0633	15.6323	16.6226	11.7533	19.8032	20.6333	21.6452	23.1806	17.1367	8.1871	9.94333	12.4742	12.6774	8.38667	63.9677	74.9667	76.5161	67.7419	77.0667	1.56452	2.28667	4.14194	1.97742	0.923333	8.64839	6.61667	6.76452	8.49355	7.21333	8.6029	6.89773
63	train	Usti nad Labem	2013	-106.146	-111.146	14.8536	-30.1464	-51.1464	9.67742	13.96	17.9452	15.971	9.76667	15.2452	19.58	24.4774	22.4452	13.94	6.35161	10.12	13.7935	12.3613	7.20333	81.8387	76.1	65.3871	69.4839	84.8333	4.4	2.87	1.20323	2.63871	1.97667	4.27742	6.77667	9.94516	7.76774	4	5.50415	3.76727
64	train	Usti nad Labem	2014	-79.1464	-4.14637	-36.1464	-48.1464	-56.2927	9.55161	13.8567	17.2613	13.7258	12.3333	15.6613	20.2167	23.3516	19.2548	16.65	6.07419	10.05	13.5387	10.7935	9.75	79.0968	68.1333	72.5806	76.4516	87.3667	2.89677	0.953333	2.51613	2.30645	2.11667	5.60323	7.22667	5.86452	3.83871	3.58333	8.30882	7.76044
65	test	Usti nad Labem	2015	-8.14637	-32.1464	3.85363	-2.14637	14.7073	10.0839	12.7433	17.3161	19.329	10.54	15.9161	18.4333	23.4323	25.4839	15.23	6.09355	8.96667	13.0677	14.8581	7.74	68.3226	76.5667	66.871	65.9355	80.8333	1.25161	2.91667	1.35161	2.65484	0.863333	6.90645	6.66667	9.20323	9.13548	5.14333	4.39431	3.99856
66	train	Usti nad Labem	2016	-22.1464	-43.1464	-45.1464	2.70726	-21.1464	11.3742	15.1467	16.2226	15.2097	14.9167	17.9097	21.1867	21.7484	20.8323	19.45	7.37097	11.6867	12.7516	11.5258	11.7767	71.9032	78.3333	75.9677	75.3871	75.5333	1.23226	3.32667	2.76129	1.32258	3.78333	5.73226	5.47	5.58065	6.86129	6.26333	8.75046	8.54998
67	train	Usti nad Labem	2017	-8.14637	-14.1464	-19.2927	-27.2927	-24.2927	12.0161	15.4833	15.9677	16.0871	9.73667	18.4387	22.1833	22.1194	21.8645	13.5733	7.70323	11.1567	12.4387	12.2742	7.43667	71.7097	69.3	77.5484	76.3871	87.4333	1.59032	2.68333	2.26452	2.72258	1.23667	7.41935	9.62	6.40968	7.63226	3.46	7.15492	7.74774
68	train	Usti nad Labem	2018	2.85363	18.8536	60.8536	44.8536	10.8536	14.3645	15.26	18.5	18.8516	13.5	21.2516	21.71	25.2194	26.3	19.3533	9.64839	11.44	13.6548	14.1839	9.9	69.4516	74.7667	58.7097	62.2258	70.9	0.790323	0.896667	0.409677	1.6	1.51667	9.64194	7.25333	9.94194	8.57419	6.89333	5.42121	5.55968
69	train	Vysočina	2002	-10.8781	-25.8781	-38.7563	-136.756	-36.8781	8.94096	10.0213	12.2734	16.3758	14.1967	13.3419	15.2499	17.5086	21.6887	19.1917	4.85645	5.0993	7.36371	11.5726	9.28	76.0536	74.4661	71.8484	74.7419	75.8833	1.75225	2.07672	1.74516	4.0629	2.25667	5.67725	7.01839	6.48183	6.97258	7.39833	7.66976	7.01683
70	test	Vysočina	2003	-80.8781	22.1219	0.121862	47.1219	14.1219	5	11.1785	12.5485	17.6677	16.375	10.2458	17.0311	18.2999	24.3581	22.4367	-0.047235	5.8829	6.83392	11.1935	10.2633	74.2604	68.9065	64.7108	62.5806	64.3167	1.7659	0.75371	1.57484	2.26613	1.33833	6.62356	7.88414	7.21968	9.67097	8.96333	3.1969	0.257401
71	train	Vysočina	2004	-38.8781	-39.7563	-20.8781	10.1219	-12.8781	5.64689	8.5786	12.7281	14.4323	13.7517	9.70729	13.1323	18.0861	20.2468	19.1383	1.68376	4.01355	7.44048	9.09032	8.63	77.8109	77.5898	74.0495	72.0645	75.6833	1.66691	2.11339	1.63306	1.93065	2.49	4.06274	5.08446	6.73505	7.15484	6.45333	2.18154	1.99497
72	train	Vysočina	2005	-50.8781	-3.75628	-77.8781	-63.8781	-31.8781	3.62114	7.51677	12.4848	13.4968	14.11	8.23721	12.347	17.8097	19.1016	19.46	-0.8375	2.35651	7.42	8.14032	8.885	85.1417	75.2333	73.0478	75.8871	75.2333	2.91555	0.962527	3.46812	2.16129	1.88333	5.19718	6.55274	6.72409	7.22258	7.29333	4.42267	3.03868
73	train	Vysočina	2006	-77.8781	-47.8781	32.2437	-108.878	18.1219	4.09752	7.57054	13.6754	13.0048	15.345	8.29194	12.2209	19.7354	17.9468	20.7367	-0.211924	2.92237	7.915	8.60161	10.0117	79.212	79.8382	73.4263	77.129	74.4167	2.15121	2.42742	1.58683	3.91452	1.97667	4.78871	5.81376	7.49478	5.44677	8.2	4.09063	4.58638
74	train	Vysočina	2007	-14.8781	-5.75628	-3.87814	24.2437	-93.8781	8.1038	11.1792	14.0031	15.629	14.4583	12.3109	16.3258	20.0076	21.4113	19.83	3.74349	6.17516	7.61968	9.66774	9.27	83.2851	78.7866	65.2876	71.8387	77.1833	1.98197	1.91102	1.37032	1.58871	2.71167	5.16688	6.22548	8.73667	7.35323	6.27167	4.37271	3.35438
75	test	Vysočina	2008	-26.8781	7.12186	-15.8781	-7.75628	-3.87814	7.63192	9.78419	12.4653	15.3516	14.2867	12.2293	14.5654	17.676	20.6903	19.495	2.91385	5.04677	7.41285	9.38065	9.485	77.9032	78.822	77.8344	72.4194	74.4833	1.32481	1.8822	1.67333	1.97742	1.37667	5.99933	5.75866	5.86419	7.42581	5.95	4.1273	5.5824
76	train	Vysočina	2009	-25.8781	-99.7563	-83.8781	-37.8781	25.2437	5.49073	8.35328	14.6685	15.4548	14.305	9.09009	12.4847	20.6783	21.0258	19.6533	1.70789	4.76392	8.68194	9.74516	9.68167	83.235	81.8038	69.8602	72.6935	76.8	3.04626	3.56194	2.28435	2.35645	2.15667	4.01636	3.54726	8.50108	7.53548	5.78833	4.39627	3.73326
77	train	Vysočina	2010	-90.8781	-51.8781	-55.7563	-117.878	-79.8781	4.32598	9.13306	13.6189	13.8387	13.5583	7.62247	13.5148	19.0559	18.3032	18.0567	1.33065	4.47468	7.72849	9.89032	8.93667	83.7206	73.2753	70.8581	80.8065	76	2.23629	1.59925	2.87204	4.4629	2.57833	2.29343	6.40054	8.14409	4.17903	6.09167	3.45271	4.96685
78	train	Vysočina	2011	-7.87814	-13.7563	-62.7563	-21.8781	-14.8781	4.73929	9.98177	13.0291	15.4177	15.6033	9.37425	15.2602	18.2541	21.179	20.94	-0.295565	5.18919	8.05866	9.56613	10.5567	75.6267	72.364	73.2995	72.9839	76.9333	1.09522	1.97833	2.715	2.74677	2.76833	6.22938	6.70091	6.3986	8.03226	7.34	4.98846	4.03745
79	train	Vysočina	2012	-27.8781	-8.87814	-42.7563	-25.8781	5.12186	4.25456	11.0524	13.0883	16.2306	15.0767	8.56663	16.2195	18.3755	22.2177	20.2917	-0.56574	6.25683	8.1886	10.2274	9.82167	75.2147	75.6962	75.0495	69.5645	78.9	1.78637	1.23419	2.80478	2.0371	2.03167	6.11285	6.40715	6.28022	8.1871	6.24333	4.69372	4.22716
80	test	Vysočina	2013	-85.8781	-104.878	16.1219	-3.87814	-28.7563	5.25058	7.44941	13.5499	14.6129	13.5133	8.51959	11.4626	18.7222	19.8742	17.95	2.54954	3.74844	8.0193	9.61129	9.23667	84.6382	79.5919	71.3355	73.3871	77.8167	2.59862	2.5486	0.86371	2.71613	4.71333	2.78802	4.60495	7.41113	6.1871	5.15667	1.23681	1.28194
81	train	Vysočina	2014	-97.8781	-1.87814	-11.8781	-57.7563	-88.8781	6.62437	10.7908	14.0126	13.4452	14.6017	10.83	16.2894	19.8442	18.2403	19.6467	2.91872	5.27769	8.54054	8.92903	9.65167	79.1538	67.7484	70.4409	75.8871	72.05	2.06308	1.19274	2.74242	4.51452	2.71333	4.57465	6.6857	6.35043	5.59677	6.56333	3.94946	3.53726
82	train	Vysočina	2015	-0.878138	13.2437	45.1219	11.1219	10.1219	5.80812	9.64586	13.4723	16.7129	14.3117	9.82281	14.6477	19.4042	21.9806	19.48	1.87828	4.82656	7.66204	10.9339	9.78	74.9931	69.5468	62.8694	64.871	72.1667	0.843952	1.28849	1.19667	1.3871	1.81833	3.77823	5.80661	7.48522	6.80484	5.56667	0.120157	2.5946
83	train	Vysočina	2016	-33.8781	-0.756275	-39.8781	13.1219	49.1219	7.80656	9.74462	12.688	14.8806	16.4683	11.8377	14.1157	18.3125	20.2468	22.2633	3.89294	5.48199	7.43747	9.57258	10.6667	74.4605	75.4914	69.1484	68.4355	68.8833	1.53515	1.48747	1.86968	1.70645	1.62167	4.29449	4.54898	5.98473	6.78871	6.97167	4.78528	4.86235
84	train	Vysočina	2017	-10.8781	13.1219	-29.8781	2.24372	-24.8781	7.13894	11.5732	12.2365	16.2645	14.8483	11.9592	16.9685	17.3888	21.9903	19.8583	2.55029	6.12715	7.51468	10.2645	9.65	75.3894	71.6027	74.9118	68.3871	70.9667	0.892857	1.80328	3.88694	1.20161	2.7	5.39361	7.06855	5.05296	8.22097	6.625	4.12385	4.55542
85	test	Vysočina	2018	9.12186	-7.87814	33.2437	51.1219	-24.8781	5.86797	8.62446	15.9988	18.3677	15.8433	10.2146	13.2485	22.6638	24.7226	21.7217	1.25691	4.42968	8.97441	11.6161	10.3567	75.1509	76.686	61.8989	62.4032	71.4833	1.26843	1.47183	0.468387	1.49516	1.945	6.23992	4.57995	8.41242	8.47742	6.615	2.93865	2.33306
86	train	Plzen	2002	-41.3135	-49.6271	-44.3135	-172.627	-62.3135	12.5387	16.1333	15.9	16.6645	10.5033	17.6129	21.03	20.7903	21.1387	14.9	8.47419	11.7967	11.771	13.6258	7.2	77.9677	72.1	79.7419	84.7742	83.9667	2.22258	2.23333	2.11613	5.79677	2.65667	6.40968	8.95333	6.40323	6.38065	5.76333	8.38956	7.0133
87	train	Plzen	2003	-27.3135	18.6865	1.68646	59.6865	24.6865	13.0806	18.7467	17.1419	20.4613	13.08	19.7774	25.7033	24.1032	28.1387	19.1633	8.47742	13.34	12.7871	14.7516	8.49667	74.3871	64.6667	70.7419	54.2903	68.2	1.80968	2.00333	1.89677	0.670968	0.99	7.24194	10.9267	8.46129	10.5387	7.32667	4.75058	4.38206
88	train	Plzen	2004	-62.3135	-70.3135	-47.3135	-13.6271	-27.3135	9.73871	13.7233	15.6548	16.6452	12.07	15.6839	19.4433	21.1645	22.3452	17.0833	5.78065	9.43333	11.2548	12.6032	8.18	74.9355	74.0333	75.9677	74.7097	76.8333	1.86774	2.62667	2.73871	2.67742	2.84333	6.17742	6.96	7.39677	7.76452	6.41	3.37997	4.37039
89	train	Plzen	2005	-58.3135	-31.6271	-43.6271	-61.3135	-22.3135	11.729	15.33	16.5548	13.9516	13.02	17.1645	21.0533	22.0806	18.6935	17.9	7.2129	10.4533	12.471	10.6323	9.65333	70.7097	66	74.4516	81.6452	81.7333	2.2	1.63	2.76452	2.82581	0.983333	8.07742	9.24333	6.84516	5.73226	6.43667	6.55204	6.5095
90	test	Plzen	2006	-120.314	-48.3135	17.3729	-55.3135	2.68646	11.3581	16.3167	20.8258	12.9806	14.8433	17.2903	22.2133	27.5839	18.7613	20.6767	7.26452	11.44	15.6387	9.98065	10.4567	72.3226	66.8333	63.7419	83.6452	76.9	4.92903	1.85333	2.52903	3.97419	0.93	7.09677	8.80333	11.0516	4.30323	8.08667	6.00933	5.23611
91	train	Plzen	2007	-55.3135	-42.3135	-46.6271	-32.3135	-54.6271	12.2806	15.54	15.4839	15.5774	10.3167	17.7129	20.8567	20.5	20.8581	14.6633	7.71613	11.7233	11.8355	11.6484	7.23	72	78.2667	77.7097	76.9677	85.3333	3.59032	3.54333	3.05806	1.87419	3.09	7.41935	6.72333	6.87097	7.0871	5.25333	6.39353	5.7508
92	train	Plzen	2008	-14.3135	11.6865	4.68646	1.68646	-13.3135	12.5129	15.9233	16.1968	15.6774	10.23	17.8452	21.3367	21.6774	21.0516	14.4967	8.29677	11.6	12.229	11.7613	7.60333	74.9677	73.8	74.5806	73.6774	83	1.02903	0.966667	2.05161	1.45161	2.52333	8.04839	7.96	7.1129	7	4.90667	6.23796	6.73495
93	train	Plzen	2009	-71.3135	-70.3135	-74.3135	-6.31354	24.6865	11.9161	13.1233	16.0774	17.1452	13.33	16.7387	17.7667	21.1871	22.3129	17.7667	7.93548	9.44667	12.229	12.8258	10.2733	77.2903	77.1	76.9032	71.2903	80.8	2.26774	3.62	3.74516	1.60645	1	6.39032	6.04333	7.07742	8.70645	6.08667	6.53482	6.29106
94	train	Plzen	2010	-79.3135	-46.3135	-38.6271	-104.627	-45.3135	9.11935	15.0867	18.6839	14.5355	9.76667	13.1226	19.68	24.2161	19.1	13.7833	6.35161	11.1867	14.2	11.6226	6.80333	84.3548	70.4333	65.6129	82.1935	82.8667	3.25161	1.76667	2.99355	5.66452	2.07	2.89032	7.32	8.7871	4.48387	4.57667	5.23712	5.4966
95	test	Plzen	2011	-43.3135	-44.6271	-117.627	-41.3135	-0.627084	12.0871	14.57	13.871	16.3194	13.6333	18.0226	20.0267	18.6226	21.5355	18.1067	7.25161	10.53	10.2742	12.4323	10.2733	64.9677	76.3333	80.2903	80.2581	82	2.53226	2.34667	5.72903	3.38387	1.96	8.84839	5.78667	5.10323	6.35484	5.8	7.4477	7.99015
96	train	Plzen	2012	-16.3135	-12.3135	-66.6271	-38.3135	-4.62708	13.1774	14.82	15.4516	17.2258	12.18	18.8452	20.05	20.4871	22.4323	17.24	8.3871	10.5433	12.0968	12.8839	8.5	65.6452	78.0333	81.1613	69.5484	75.7333	0.793548	2.35667	3.21613	1.64516	1.01333	8.29355	5.96	6.27097	7.34194	6.25	7.03785	7.3968
97	train	Plzen	2013	-110.314	-96.3135	23.6865	-44.3135	-48.3135	9.3	13.8467	18.5871	16.3968	10.4367	13.6194	18.47	23.8516	21.6258	14.2467	6.42581	10.1833	13.8258	12.471	7.71667	86.8387	76.3	60.0968	69.7097	87.3333	4.61935	3.01667	0.419355	2.92903	2.76667	2.70645	6.12333	9.36774	7.35161	3.90333	2.19508	2.27996
98	train	Plzen	2014	-62.3135	0.686458	-48.3135	-64.3135	-61.3135	10.5677	15.2133	17.6935	14.1161	12.99	15.2548	20.4367	22.7161	19.1677	17.0767	6.78065	10.7533	13.6194	10.8677	10.34	75.2258	61.1	70.3226	79.2258	88.2333	2.95161	0.756667	4.82258	3.5129	2.18667	5.42258	8.28	6.63226	5.81935	3.47333	6.03448	7.43973
99	train	Plzen	2015	-35.3135	-5.62708	53.3729	42.6865	14.6865	11.2581	14.6367	19.171	20.1226	10.8867	16.1806	19.48	24.829	25.7258	15.6567	7.47419	10.7567	14.2774	15.1452	7.76	70.0645	73.7667	59.5161	58.4839	78.4667	1.62903	1.94667	0.73871	1.8	1.21667	5.56774	5.6	8.47097	8.22258	4.15333	0.619314	2.27488
100	test	Plzen	2016	-22.3135	-63.3135	-63.3135	-8.31354	-3.31354	11.1968	14.8933	16.8677	15.8806	15.18	16.2355	19.8367	21.5355	20.8258	19.6433	7.22258	11.5367	12.9419	11.7677	11.7533	74.9032	81.5667	77.1935	76	79.1	1.33871	3.81333	3.62581	0.893548	3.2	6.02903	5.71	6.53548	8.17419	7.03333	7.173	7.70589
101	train	Plzen	2017	-23.3135	8.68646	6.68646	-2.31354	-8.62708	12.5742	16.8333	16.6613	17.1839	9.9	17.6645	22.49	21.6774	22.3548	14.0833	7.98065	11.9667	12.5161	12.9387	7.61	69.6452	64.8333	76.5161	73.5806	87	1.84194	1.52	2.50968	3.11935	1.99333	7.53871	9.09333	6.90323	7.15806	3.22	6.14092	6.01096
102	train	Plzen	2018	-9.31354	-13.6271	25.3729	48.6865	-8.31354	14.3742	15.94	19.129	19.3323	13.7333	19.3032	20.8333	24.7323	25.4452	18.69	10.0194	12.1633	14.4	14.5548	9.96333	72.5161	70.6	54.6129	58.0645	68.1	1.77419	2.20667	0.370968	1.7129	2.09667	8.26129	6.28667	8.64516	8.22581	7.30667	4.40996	5.81387
103	train	South Bohemia	2002	-10.8791	-45.8791	-68.8791	-268.879	-67.8791	14.5613	17.69	17.7742	18.2645	11.3633	20.0581	23.0533	23.3871	23.6935	16.5467	9.03871	11.5133	12.4097	13.6161	7.26333	73.2258	69.8667	73.3548	78.7419	80.9333	1.48065	2.78333	4.73226	6.76452	1.37333	7.19677	9.63	7.47419	6.82903	5.80667	7.79846	7.96283
104	train	South Bohemia	2003	-43.8791	-3.75828	6.12086	49.1209	25.1209	14.8903	20.04	18.7387	21.4387	13.9833	21.0161	26.27	25.1065	28.9	20.6733	8.88065	13.02	12.6677	14.1387	8.01333	66.0323	61.7	64.6774	52.0968	65.1667	1.79355	1.58333	1.45161	0.612903	0.456667	7.98387	10.6533	7.93871	10.5258	7.41	3.36868	2.62832
105	test	South Bohemia	2004	-54.8791	-99.7583	-32.8791	20.2417	-20.8791	11.2161	15.1267	16.6935	18.0452	13.0367	16.4	20.09	22.0839	24.3935	18.88	6.27419	9.98667	11.5452	12.5806	7.73	69.5161	71.8333	73.5484	67.7419	71.4	1.75806	4.52333	2.1871	1.67419	2.56333	6.04516	6.14	7.16129	8.15161	6.41	2.25907	2.72432
106	train	South Bohemia	2005	-52.8791	-25.7583	-85.7583	-90.8791	-58.8791	13.1484	16.53	17.8742	15.571	13.9333	18.7	21.6933	23.2548	20.7194	19.5633	7.17419	10.4367	12.5806	11.1032	9.46333	69.3226	65.5667	72.9355	78.0968	80.5	1.74839	2.39333	3.92581	2.43226	1.88333	8.3871	8.59	7.01935	5.83226	6.11333	4.66608	5.4479
107	train	South Bohemia	2006	-82.8791	-105.879	-9.87914	-79.8791	16.1209	12.371	16.9267	21.4226	14.7581	15.9233	17.5806	22.3633	27.9968	19.8	22.2567	7.4	10.97	14.7226	10.9419	10.3833	69.9355	70.3667	62.5484	75.2903	71.3	3.88065	2.45333	0.851613	2.81935	0.286667	6.84516	8.73667	10.3032	4.39032	7.88333	4.33035	5.60968
108	train	South Bohemia	2007	-30.8791	-16.8791	-8.87914	-19.7583	-111.758	14.2	17.89	17.8839	17.3097	10.87	19.8871	23.6	23.6677	23.1129	15.77	8.07097	12.1967	12.2613	12.0097	6.84	69.4194	70.9	69.8387	72.0323	82.2667	2.43871	2.25	2.29355	1.7	2.85333	7.97742	8.27333	7.38387	7.65806	4.97667	4.63763	5.67642
109	train	South Bohemia	2008	-33.8791	-2.75828	-17.8791	-20.7583	-15.7583	14.0903	17.84	18.4968	17.5226	11.7867	19.1774	22.9967	23.7645	23.4548	16.7867	8.08065	12.3367	13.0355	11.7839	7.51333	68.9032	69.3333	66.4516	69.9677	79.1333	1.00968	1.33	1.74194	3.04194	1.13333	7.6	7.95	7.47419	8.15806	5.02	4.31897	4.69026
110	test	South Bohemia	2009	-68.8791	-138.879	-74.8791	-46.8791	6.24172	13.1968	14.7967	17.9516	18.5323	14.6267	17.8839	19.3167	23.8387	24.329	19.9633	8.13226	10.3533	12.8194	12.7387	9.97	75.9677	75.6333	74.4839	69.3226	77.1667	2.43548	2.22333	3.4871	1.32581	0.743333	6.99355	6.70333	8.24194	9.07419	6.05667	4.63194	5.08819
111	train	South Bohemia	2010	-94.8791	-62.8791	-80.8791	-98.8791	-48.8791	11.0226	16.18	19.7065	16.5129	10.92	15.1065	20.7467	25.2	21.2452	15.3367	7.63871	11.2967	13.6903	12.1065	6.95667	80.2258	69.2667	65.5484	76.6129	80.7	2.6129	2.50333	2.84194	4.4	1.23333	4.32258	7.69667	9.19032	5.96452	4.87333	3.60768	4.77949
112	train	South Bohemia	2011	-57.8791	-38.7583	-92.7583	-18.8791	-8.87914	13.4742	16.5033	15.6742	17.5613	14.5667	19.1258	21.6867	20.5903	23.3968	19.8933	6.89677	11.4833	11.3548	12.3387	9.54667	63.5484	70.1333	75.7097	75.7742	77.9	2.10968	2.66333	5.31613	3.06452	1.1	9.32581	7.54	6.00645	7.41935	7.01333	5.2465	6.71657
113	train	South Bohemia	2012	-27.8791	-40.8791	-95.8791	-82.8791	-34.8791	14.1935	16.8633	17.4613	18.0258	12.9333	19.6581	21.9133	22.8903	24.2613	18.09	8.00968	11.3467	12.9548	12.1032	7.87667	60.7419	69.8667	74.6774	69.0645	78.9	1.12258	2.25667	3.4129	3.76452	1.22667	8.51613	6.51	6.85806	8.32903	5.50667	4.92784	5.69125
114	train	South Bohemia	2013	-101.879	-160.879	3.12086	-23.8791	-29.7583	11.3645	15.7833	19.7742	17.6097	12.03	15.7613	20.11	25.7	23.5742	16.3733	7.58387	10.8667	13.2452	11.6613	8.39	80.2258	74.7	61.8387	69.5484	80.0667	3.35161	2.78	0.283871	3.2129	2.00667	4.03871	6.21333	10.3871	8.05484	4.37333	1.20066	2.65456
115	test	South Bohemia	2014	-113.879	-0.87914	-47.8791	-76.8791	-75.8791	11.5613	15.99	19.0871	15.6065	13.9133	16.4	21.6433	24.9935	21.1387	18.6033	7.07419	9.73667	13.2484	10.4839	10.32	76.9677	63.7	69.6774	77.4839	86.1	3.36774	1.45667	2.81935	3.02903	1.96667	6.50968	9.18333	8.65806	5.80968	4.24667	4.11412	6.0266
116	train	South Bohemia	2016	-72.8791	-61.8791	-100.879	-2.87914	24.1209	13.0839	16.6933	18.5032	17.3419	16.1467	18.2581	22.1733	23.9065	23.5258	22.35	8.21935	11.7233	13.1774	11.4226	10.6333	68.4839	73.9667	72.129	70.6452	74.2	2.7129	2.39667	4.23226	1.23226	1.35333	6.35484	6.70333	7.00968	8.1871	7.22333	5.02457	6.74031
117	train	South Bohemia	2017	-17.8791	15.1209	-25.8791	-47.7583	-17.7583	14.1065	18.8933	18.8452	19.2968	11.6567	19.6065	25.05	24.5355	25.9	16.62	7.96129	11.84	13.3871	13.1742	7.45667	68.6129	58.6667	69.2258	67.0323	82.2333	1.23548	2.18	1.6129	1.94839	1.09	8.17097	9.94	7.24516	8.22581	3.18	4.34173	4.15692
118	train	South Bohemia	2018	-27.8791	-65.7583	-2.87914	27.1209	-15.8791	15.9806	17.4567	19.8968	20.9903	14.56	21.9935	22.5433	26.2355	28.171	20.7867	10.4774	12.5367	13.1968	13.871	9.23667	68.129	70.1667	60.8065	56.9677	72.5667	2.21935	2.39333	2.14194	0.483871	1.99667	8.57419	6.68	8.85484	8.60645	7.36	3.08417	3.42034
119	train	Central Bohemia	2002	-21.3474	-20.3474	-34.6948	-105.695	-43.3474	12.5339	17.3017	18.7847	19.2817	16.1542	21.5032	23.3633	24.3839	24.9226	17.8867	10.629	12.8633	13.6839	14.5774	8.83333	70.9032	71.7667	73.4839	79.9355	79.8667	2.68387	4.77	3.92258	6.04839	2.50667	7.4129	9	7.82581	7.20645	5.48667	8.02197	9.03698
120	test	Central Bohemia	2003	-33.3474	35.3052	2.65262	55.6526	25.6526	12.3644	18.3254	20.2983	20.7667	18.2254	21.6	26.4633	25.3032	28.2355	20.4667	9.98065	13.8733	13.8677	14.2613	8.78	66.1613	60.3333	64.9677	54.9677	67.3333	1.79032	0.813333	1.82581	1.19355	0.5	8.49355	10.88	7.6129	10.1419	6.27333	5.75087	6.25698
121	train	Central Bohemia	2004	-24.3474	-37.6948	-13.3474	21.6526	5.65262	11.6746	14.9593	18.1983	19.7267	17.5831	18.0226	22.09	24.9968	26.2774	20.47	7.71613	11.5667	13.3452	14.3032	9.28333	63.3871	67.1333	63.1613	61.7097	66.6	1.23871	2.54	1.11613	2.08387	1.43667	6.32581	6.67667	7.76774	7.62581	6.55	5.08193	4.92027
122	train	Central Bohemia	2005	-32.3474	-1.69477	-58.3474	-35.3474	7.30523	12.8271	16.3915	18.8966	18.4683	16.4915	20.5	23.0467	24.9032	22.4226	21.5933	8.76129	12.0467	14.0903	12.5323	10.3633	63.1613	60.5	69.2258	71.4194	72.8667	1.37742	1.71333	4.36129	2.42581	0.46	8.02581	8.07	6.50645	5.80645	6.1	7.78805	9.13414
123	train	Central Bohemia	2006	-69.3474	-43.3474	45.3052	-48.3474	17.6526	11.9915	16.6508	21.3119	20.0783	17.0983	19.5968	23.8	29.9516	21.729	23.8233	8.82258	12.2633	16.0774	12.7677	11.74	62.7419	63.1	56.3871	72.4194	66.4	3.09032	2.75333	0.36129	3.42581	0.146667	7.16129	8.76667	10.7161	4.13548	7.27667	6.77792	7.25718
124	train	Central Bohemia	2007	-4.34738	0.305235	-1.34738	-3.69477	-47.6948	14.5288	18.2305	20.0339	19.5633	16.1271	21.8903	25.6067	25.5839	25.0677	17.95	10.1516	13.8533	14.4516	13.9839	8.76	58.7419	62.5667	60.0968	66.6129	73.7333	1.73548	2.12	1.83871	3.23871	2.84667	7.34516	7.53667	7.03871	6.92903	4.76333	6.99252	7.56014
125	test	Central Bohemia	2008	-30.3474	14.3052	2.65262	5.65262	23.6526	12.2288	17.0797	19.222	19.3583	16.5085	20.4806	24.4167	24.8419	25.3258	18.8567	8.96129	13.4267	14.0226	13.7548	9.22333	69.9355	65.6667	67.3226	63.3226	71.2667	2.33226	2.61667	2.68065	2.09355	0.576667	6.99677	7.76333	6.45806	6.89677	4.91333	8.30238	9.52641
126	train	Central Bohemia	2009	-31.3474	-52.3474	-41.6948	12.3052	44.6526	14.5508	15.7034	17.9661	20	18.4678	20.3355	21.2933	25.6742	26.8032	22.3633	9.49355	11.7933	14.5	13.9484	11.23	65.7742	69.3	67.4516	60.4194	67.8667	3.16452	2.67333	2.50323	0.716129	0.586667	6.08065	5.06	6.67419	8.2129	5.79667	7.92492	6.84997
127	train	Central Bohemia	2010	-80.3474	-21.3474	-12.3474	-94.6948	-75.3474	11.3746	15.4492	20.0661	19.96	15.3492	17.1581	22.82	27.4387	23.4871	17.1533	9.2871	12.2567	15.4	13.8097	8.31333	72.8387	63.7667	61.4839	73.3871	77.5667	3.04516	1.95333	3.02581	5.0871	3.00667	2.60968	8.31	8.82581	5.87419	4.90667	7.10221	5.83257
128	train	Central Bohemia	2011	-11.3474	-11.3474	-99.6948	-26.3474	12.6526	13.6644	16.9102	18.3322	18.5967	17.6	21.4226	24.0367	22.5387	25.3871	21.8333	7.86774	13.12	13.0032	13.8677	10.9167	59.871	62.2	67.4194	71.4516	72.7333	1.29355	2.93	4.8871	2.3871	0.846667	9.62258	8.36333	6.1129	7.38065	7.23333	9.26574	8.95972
129	train	Central Bohemia	2012	-10.3474	9.65262	-37.3474	-35.3474	3.30523	13.1797	17.5085	19.2695	19.9633	17.5407	22.2	24.1567	25.5871	27.2065	20.6433	9.55806	12.68	14.6258	13.8677	9.42333	57.6452	64.5	68.4839	61.9677	73.0333	2.32258	2.25333	3.14516	2.33548	1.45	8.63226	7.34667	7.46129	8.3129	6.5	8.97116	7.05511
130	test	Central Bohemia	2013	-95.3474	-128.347	4.65262	-35.3474	-36.3474	11.722	15.3678	19.6593	20.315	16.2797	17.8935	22.2433	27.3548	25.2968	18.2667	8.84516	12.2133	14.3839	13.0742	9.77333	76.2903	70.4	59.0645	67.3548	77.1667	4.90645	6.48667	1.36452	3.90323	1.47667	4.45161	6.69	9.59355	7.49677	3.95	5.21655	6.41359
131	train	Central Bohemia	2014	-93.3474	8.65262	-13.3474	-11.6948	-29.3474	12.6356	15.7814	19.7847	19.365	16.5288	18.7032	23.3967	27.2032	23.0097	20.8233	8.52903	11.3933	15.0871	12.6	11.4267	72.871	59.8333	67.1935	74.129	83.8333	3.2871	0.593333	5.55806	2.95806	2.73	5.68065	8.14333	7.85806	5.18387	4.47333	8.49155	9.01482
132	train	Central Bohemia	2015	-16.3474	5.65262	57.6526	20.6526	30.6526	12.1136	16.0814	20.039	22.9567	19.1203	19.5129	22.8533	28.7194	29.7774	20.44	8.6129	12.35	15.5452	16.6194	10.1233	65.3871	67.1667	55.7742	58.4194	67.5	1.15161	2.29	0.777419	2.05161	0.85	6	6.82333	8.42258	8.21613	5.06	3.90779	5.7432
133	train	Central Bohemia	2016	-32.3474	-8.69477	-25.6948	19.3052	26.6526	12.4203	17.2492	19.9119	19.9467	18.6017	20.7871	24.6867	26.6323	25.4742	24.4467	9.35484	13.6967	15.2065	13.0194	11.8933	63.0968	67.5333	64.0323	64.8387	67.0333	2.38065	2.08333	3.64194	0.825806	1.38333	6.54516	6.8	6.59355	7.52903	7.49	9.12831	8.19781
134	train	Central Bohemia	2017	-5.34738	-7.34738	-13.6948	-6.69477	3.30523	12.0119	17.9492	20.3712	20.3017	16.7305	21.1871	26.1967	26.0742	26.5419	18.23	9.34194	13.17	14.9645	14.5452	9.06	62.4194	54.2	63.8387	63.871	76	1.44839	3.55333	2.15484	2.86452	1.08	8.01613	9.73667	6.65806	7.95484	3.54	7.52641	7.35792
135	test	Central Bohemia	2018	16.6526	1.65262	58.6526	57.6526	6.65262	16.3847	18.5847	20.6966	22.3333	19.422	23.8581	24.79	28.271	29.5484	22.8567	11.3226	13.74	14.5581	15.7613	10.6233	58.7742	63.9333	50.7419	53.3226	65.8	1.19032	2.47	0.967742	0.980645	1.20333	9.15806	7.47667	9.64516	8.33226	6.72	5.6476	5.38793
136	train	Prague	2002	-21.3474	-20.3474	-34.6948	-105.695	-43.3474	15.3774	17.5733	18.7903	19.3323	12.6967	20.5903	23.0633	24.0677	24.6355	17.8033	9.70968	12.07	12.9871	14.1194	8.33667	74.6129	72.6	72.0323	77.4516	77.7333	1.90323	2.73333	3.22903	3.94194	1.45	7.33548	8.76333	7.67097	7.07419	5.34667	7.50062	8.11503
137	train	Prague	2003	-33.3474	35.3052	2.65262	55.6526	25.6526	15.2548	20.0767	19.0613	21.0806	14.31	20.8323	26.05	24.8226	27.8355	20.4133	9.32903	12.77	13.3129	13.7677	8.24	68.2581	60.7667	66.0968	53.7419	66.2	2.29355	0.853333	2.4	0.519355	0.823333	8.56774	11.11	7.64516	10.0419	6.45333	6.02806	5.28461
138	train	Prague	2004	-24.3474	-37.6948	-13.3474	21.6526	5.65262	11.9	15.8067	17.7032	19.0935	14.0233	16.9742	20.8667	23.4903	25.0581	19.6967	6.30968	10.4567	12.029	13	8.10333	69.5806	71.4	69.1935	64.5161	68.1333	1.53871	3.57333	1.59355	1.74194	1.12	6.7129	7.08333	7.93548	7.81935	6.59333	6.02322	5.00038
139	train	Prague	2005	-32.3474	-1.69477	-58.3474	-35.3474	7.30523	13.9645	16.5467	18.4935	16.5871	14.9767	19.2548	21.74	23.8323	21.5774	20.8267	8.3	10.9033	12.9645	11.5452	9.45333	66.3871	66.2	71.6129	73.871	74.7333	2.66452	2.17333	4.02903	1.77742	0.98	8.49032	8.6	7.00645	6.24839	6.52667	8.06246	7.40906
140	test	Prague	2006	-69.3474	-43.3474	45.3052	-48.3474	17.6526	13.4839	17.6767	22.3806	15.7871	16.6933	18.829	22.93	28.971	20.8742	22.88	8.03226	11.24	15.2258	11.9935	10.9633	63.7419	65.8333	59.4839	74.8065	69.9333	3.12903	1.96333	0.925806	2.98065	0.356667	7.25806	9.12	10.8581	4.2129	8.10667	6.75531	5.69337
141	train	Prague	2007	-4.34738	0.305235	-1.34738	-3.69477	-47.6948	15.1097	18.6267	18.6774	18.3484	12.4067	21.1258	24.4467	24.3903	24.0355	17.27	8.67742	12.7833	13.5	13.0774	8.17	62.9677	68.3333	65	68.3548	76	1.94194	2.57667	2.28387	2.66129	2.03667	7.82258	7.87333	7.20968	6.82581	5.05333	6.80411	7.6044
142	train	Prague	2008	-30.3474	14.3052	2.65262	5.65262	23.6526	14.0935	17.7433	18.5194	18.2194	12.7367	19.5452	23.2233	23.9258	24.129	17.77	8.09677	12.1333	12.9032	12.5935	8.28667	72.2903	68.4667	67.871	65.6774	73.9667	1.77097	2.2	2.37742	2.21613	0.613333	7.70968	8.18	6.8	6.87742	5.02667	9.23061	7.15058
143	train	Prague	2009	-31.3474	-52.3474	-41.6948	12.3052	44.6526	14.171	15.12	18.6258	19.6032	16.04	19.2871	20.11	24.5516	25.629	21.4433	8.49355	10.4533	13.6613	13.1742	10.8567	68.871	74.8667	70.6774	63.5161	69.9667	2.69355	2.99667	2.08065	0.729032	0.52	6.27097	5.52	6.95161	8.59032	6.28667	8.31683	8.10885
144	train	Prague	2010	-80.3474	-21.3474	-12.3474	-94.6948	-75.3474	11.8484	17.2467	20.9419	17.7129	12.25	15.9645	22.0233	26.6097	22.7387	16.7	8.59677	11.4333	14.5032	13.4226	7.94	78.0645	67.6667	64.7097	74.7097	77.5333	2.52581	1.92	4.12903	3.98387	2.41333	3.19355	8.27667	8.63548	5.28387	4.84	7.98061	6.94558
145	test	Prague	2011	-11.3474	-11.3474	-99.6948	-26.3474	12.6526	14.2194	17.6467	16.8484	18.6355	15.6333	20.229	23.13	21.7452	24.2903	21.2133	6.81935	12.1267	12.0677	13.3065	10.4233	62.0645	66.9667	71.9677	73.4839	75.0333	1.07742	2.17667	4.65484	1.76129	1.08667	9.53226	7.90333	5.29355	6.57419	7.10333	9.88803	9.07136
146	train	Prague	2012	-10.3474	9.65262	-37.3474	-35.3474	3.30523	15.2194	17.4867	18.5613	19.4194	14.1033	21.2194	23.2767	24.671	25.9677	19.7	8.18387	11.29	13.6806	13.2774	8.92333	61.6452	68.1333	71.5806	63.7742	74.6	0.848387	1.24	3.60645	2.01935	1.8	8.38387	6.84	6.67742	7.85806	6.50667	9.72099	7.67366
147	train	Prague	2013	-95.3474	-128.347	4.65262	-35.3474	-36.3474	12.0323	16.1933	20.1871	18.2032	12.5133	16.7484	20.89	25.9065	24.071	17.17	7.60968	10.73	13.271	12.0903	8.68667	81.1935	76.3	64.3548	68.9677	78.5333	4.23226	5.01	1.6129	4.67097	1.13667	4.1871	6.87	9.91613	7.98387	4.25333	7.26761	4.8925
148	train	Prague	2014	-93.3474	8.65262	-13.3474	-11.6948	-29.3474	12.2548	16.4533	19.8484	16.4548	14.7667	17.2677	21.8467	25.5355	21.5839	19.5967	7.20645	9.97333	13.9258	11.4258	10.6767	76	64.0667	68.9677	72.6774	82.2333	3.8871	0.706667	5.26129	1.76452	2.69	6.31935	8.40333	7.80968	5.3129	4.64333	9.73512	8.16239
149	train	Prague	2015	-16.3474	5.65262	57.6526	20.6526	30.6526	13.2226	16.2867	20.9194	22.3968	13.7633	18.1581	21.5233	27.0452	28.0387	19.3333	7.7129	10.9267	14.3258	15.6903	9.14667	66.0323	68.6667	57.4839	59	69.4	1.31613	1.12667	1.54194	2.02581	0.3	6.39032	6.62	8.5871	8.63548	5.14667	6.31684	4.36603
150	test	Prague	2016	-32.3474	-8.69477	-25.6948	19.3052	26.6526	14.1258	17.6867	19.3742	18.4806	17.41	19.4774	23.03	25.071	24.3387	23.1367	7.81613	12.2967	13.7806	12.1484	11.6167	66.5484	73.1	68.3226	65.3871	68.0667	1.77742	2.46333	1.71613	1.50645	1.01667	7.36774	7.01	6.76774	7.86129	7.51667	9.88117	8.17909
151	train	Prague	2017	-5.34738	-7.34738	-13.6948	-6.69477	3.30523	14.4387	18.83	19.3065	19.3258	12.5467	19.9742	24.82	24.9194	25.0387	17.2667	8.16452	11.7633	13.871	13.5968	8.7	66.129	59.5	66.6774	66.5484	77.8667	1.07097	3.88333	2.13548	2.53548	0.79	8.55161	9.95	6.76129	8.02258	3.74	7.95419	5.93563
152	train	Prague	2018	16.6526	1.65262	58.6526	57.6526	6.65262	16.9387	18.1	21.4129	21.8677	15.8833	22.5065	23.1967	27.4097	28.3032	21.96	9.89355	12.7267	13.7613	14.9516	10.4033	62.2581	68.3333	51.3226	54.9355	64.6667	0.967742	3.48333	0.522581	1.61613	1.22	9.42258	7.65333	9.85806	8.69355	6.92667	6.13715	6.17505

## Sheet: Table S3
Table S3. The predicted and observed yields of Grain Maize in different regions of Czechia in 2002-2018
No.	Dataset	Region	No.	1	2	3	4	5	6	7	8	9	10	11	12	13	14	15	16	17	18	19	20	21	22	23	24	25	26	27	28	29	30	31	32	33	34	35	36	37
	Dataset	Region	Climate factor	water deficit	water deficit	water deficit	water deficit	water deficit	Temp. Mean	Temp. Mean	Temp. Mean	Temp. Mean	Temp. Mean	Temp. Max	Temp. Max	Temp. Max	Temp. Max	Temp. Max	Temp Min	Temp Min	Temp Min	Temp Min	Temp Min	humidity	humidity	humidity	humidity	humidity	precipitation	precipitation	precipitation	precipitation	precipitation	Sunshine	Sunshine	Sunshine	Sunshine	Sunshine	Observed Yield (t/Ha)	Predicted Yield (t/Ha)
			Units	(mm)	(mm)	(mm)	(mm)	(mm)	（℃）	（℃）	（℃）	（℃）	（℃）	（℃）	（℃）	（℃）	（℃）	（℃）	（℃）	（℃）	（℃）	（℃）	（℃）	(%)	(%)	(%)	(%)	(%)	(mm)	(mm)	(mm)	(mm)	(mm)	(hours)	(hours)	(hours)	(hours)	(hours)
	Dataset	Region	Month	05	06	07	08	09	05	06	07	08	09	05	06	07	08	09	05	06	07	08	09	05	06	07	08	09	05	06	07	08	09	05	06	07	08	09
1	train	Liberec	2002	-15.4316	-0.431563	-11.8631	-87.8631	-53.4316	14.6484	16.4067	17.8935	18.4548	11.4067	20.129	22.01	23.2968	24.4516	16.7967	9.51613	10.93	12.5548	13.5935	6.64333	76.6774	74.2	76.3871	80.0968	83.8	1.4	1.73	2.84194	7.18387	2.16	7.20323	7.65	6.65161	7.62903	4.55667	7.80146	7.34433
2	train	Liberec	2003	-33.4316	24.1369	-20.4316	32.1369	1.56844	14.429	18.6667	17.9645	19.1	13.1	20.6323	25.1733	24.0677	26.8452	19.69	8.6129	12.06	12.2097	11.8742	8.22	69.3226	60.7667	69.0645	59.7097	71.5667	2.18065	0.883333	2.76452	0.467742	1.75	7.83226	9.46333	7.20968	9.64194	5.97	3.79246	3.70473
3	train	Liberec	2004	-52.4316	-26.8631	-22.8631	-23.8631	-31.8631	11.1516	15.13	16.9258	18.0903	12.78	16.5742	20.9133	23.0581	24.7065	18.8633	5.66452	9.94333	11.7065	12.4065	8.07333	75.2903	75.2667	75.6774	72.9677	77.8	2.16452	2.36333	2.76774	1.70323	1.73333	5.31935	5.98333	7.11613	7.97419	6.40667	2.80239	3.66364
4	train	Liberec	2005	-65.4316	-39.4316	-100.863	-66.4316	-62.4316	12.8581	15.49	17.871	15.4871	14.3167	18.9419	21.0733	23.8484	21.7516	20.8933	7.63871	9.24667	12.7516	10.3516	9.41667	72.2258	70.4667	76.1613	80.5161	79.4333	2.26452	2.56	3.99677	2.94839	2.16667	7.31935	8.32667	6.53226	6.78065	7.49	5.21549	5.33951
5	test	Liberec	2006	-49.4316	-19.8631	58.1369	-151.432	-3.43156	12.5	16.8767	21.9484	15.1548	16.2367	18.6548	23.24	29.3484	20.1161	21.9133	6.92581	10.3933	14.1323	11.8645	11.72	67.7097	68.5333	59.0968	82.9677	73.1	2.61935	2.79667	1.16774	7.57419	1.12333	6.95484	8.31333	10.9548	3.95161	7.37667	4.74511	6.56763
6	train	Liberec	2007	-15.4316	-25.8631	-48.8631	-48.4316	-84.8631	14.1935	17.5	17.4839	16.9452	11.2133	20.4806	23.7433	23.4581	23.9871	16.54	7.57097	11.6933	12.2806	10.9839	7.31667	65.1613	70.8667	70.6129	73.2581	80.8667	2.75484	3.13667	2.58065	2.06452	3.59	7.39355	6.9	6.18065	6.86452	4.23667	5.02549	4.87147
7	train	Liberec	2008	-19.4316	-2.43156	-26.8631	-52.8631	-17.8631	13.1645	16.86	17.2484	16.829	11.72	19.7935	23.0967	23.3742	22.8	17.39	6.80968	10.19	11.6194	11.6935	7.34	70.2581	66.4	73.6774	74.4194	81.6667	0.790323	1.71667	3.73548	2.71613	0.986667	8.17419	7.49667	6.46129	6.40968	4.85	5.0588	6.02994
8	train	Liberec	2009	-75.4316	-87.4316	-82.4316	-18.4316	27.5684	12.7065	13.8867	17.3194	17.4968	14.03	18.4161	19.22	23.4355	24.0355	20.12	6.70323	9.30667	12.3935	11.5839	8.90333	66.2903	73.0333	67.4516	63.871	72.9333	4.63871	3.56333	3.31935	2.79032	1.02667	6.54839	4.61667	6.05806	8.64839	5.53667	5.21832	5.87179
9	train	Liberec	2010	-119.432	-23.4316	-36.4316	-258.432	-145.432	10.571	15.76	19.5258	16.4516	11.07	14.8387	21.2967	26.1548	21.1774	16.0133	6.96452	9.16333	12.8968	12.0226	6.93	75.8387	65.5667	61.6452	72.1935	74.2333	4.62581	2.63333	5.05161	13.3548	5.66667	2.10323	8.04667	8.26774	4.62903	4.67333	4.26102	5.04723
10	test	Liberec	2011	-33.4316	-50.8631	-183.432	-66.4316	-34.4316	13.1258	16.3033	15.8419	17.4226	14.1633	19.5258	22.2833	20.4645	23.4	20.1233	6.27419	10.5933	11.4097	12.4903	9.14667	59.4516	66.8333	72.4839	72.5484	74.6	2.12903	2.75667	9.67097	2.79032	2.17333	9.39355	7.17	5.19677	6.2129	6.28	5.97188	5.86454
11	train	Liberec	2012	-13.4316	-12.4316	-102.863	-66.4316	-21.4316	14.2645	15.8633	17.7226	17.2355	13.0567	20.3032	21.2033	23.6677	23.8323	19.0367	7.77742	10.3933	12.4839	11.4935	7.63	57.4839	66.7667	68.3226	66.4839	72.4333	1.19355	2.13667	4.87419	4.49677	1.19	7.96452	5.43667	6.85806	7.43226	5.99	5.66588	5.04044
12	train	Liberec	2013	-88.4316	-138.432	-41.4316	-22.8631	-69.8631	12.0419	15.5433	18.6032	17.2355	11.5633	16.7355	20.6	25.3129	24.3032	16.73	7.67742	10.4767	12.0387	11.1677	7.58667	75.8387	75.4333	67.4194	68.3548	81.6333	4.29677	6.72	4.05161	2.08387	3.15667	4.25161	5.35	8.19355	7.26452	3.58333	2.02143	2.00831
13	train	Liberec	2014	-105.432	-8.43156	-33.4316	-42.4316	-41.8631	11.871	15.52	19.1161	15.9742	14.2433	16.8226	21.66	25.4903	21.4613	19.5533	7.12903	9.48	13.8194	10.9419	10.4167	74.6452	64.2333	70.7419	74.2258	84.4	4.23871	1.49667	3.26129	2.84839	2.56	4.62581	6.82333	7.06452	4.96774	4.51667	4.94214	6.48803
14	test	Liberec	2016	-16.4316	-56.4316	-74.4316	-20.4316	8.56844	13.2387	16.56	17.771	16.0452	15.45	19.2581	22.16	23.5161	22.2161	22.27	7.00968	10.9267	12.3065	10.3032	9.78333	63.2581	70.5667	69.3871	71.129	72.3333	1.0871	4.85333	4.28387	1.50323	2.69667	6.79032	6.14667	6.13871	6.2	7.07333	5.77309	6.00028
15	train	Liberec	2017	-26.4316	-32.4316	-78.4316	-46.4316	-49.8631	13.2323	17.2467	17.6484	17.5484	11.49	18.7645	23.1433	23.3258	23.1613	16.19	7.55806	10.5267	12.1323	12.1355	7.36333	65.7419	61.1	70.4839	71.2903	79.9	1.4	3.23667	5.65161	3.29355	3.01333	7.28387	8.63	5.92258	7.0129	3.40333	4.91211	4.89329
16	train	Liberec	2018	8.56844	-0.431563	43.1369	47.5684	6.56844	15.5065	16.6	19.0323	20.0806	14.2067	22.0452	22.83	26.0355	27.7968	20.7767	8.79677	11.5467	11.3258	13.1968	8.74333	63.1613	66.7	54.9677	53.7097	64.7667	1.94516	2.28667	0.867742	0.890323	1.19333	8.69677	5.95667	9.20968	7.85161	6.31	3.55303	4.89824
17	train	Moravian-Silesian	2002	-40.0327	-63.0655	-42.0327	-56.0655	-77.0327	13.8823	14.9233	16.9468	16.6274	9.65833	19.2242	19.935	22.5565	21.5419	14.2267	9.18065	10.35	12.0516	12.8597	6.335	74.8387	77.2333	75.9032	80.3065	83.3	4.31129	5.045	3.19839	6.14355	3.79	7.31613	7.685	7.89355	6.38871	4.53	7.47377	6.58504
18	train	Moravian-Silesian	2003	-54.0327	18.9345	-46.0327	4.96727	3.96727	13.3177	17.15	16.279	17.5935	11.6617	19.3435	23.3233	21.4403	24.5	18.1233	8.2871	11.5883	12.1968	12.1161	6.82	75.6935	67.5167	79.2903	67.3387	73.2167	2.48548	1.06	5.22581	0.932258	2.13167	7.69355	9.55667	5.77903	9.85968	6.63167	3.74704	3.92703
19	test	Moravian-Silesian	2004	-41.0327	-65.0655	-28.0327	21.9673	6.96727	9.00645	13.2033	15.1242	16.1419	10.7117	14.2935	18.3917	20.5823	21.9565	16.0367	4.68871	9.23667	11.0081	11.4645	6.37	75.2581	78.4167	76.9194	73.3226	76.8333	1.88548	4.45333	2.5	1.75161	1.62167	5.80645	5.485	6.56129	7.49516	5.91833	3.11068	4.14334
20	train	Moravian-Silesian	2005	-78.0327	-39.0327	-76.0655	-96.0327	-24.0327	11.1855	13.4233	16.4339	13.9823	12.0083	16.8468	18.43	21.5355	18.779	17.3483	6.1129	9.01167	12.2016	10.429	8.15	74.2903	77.35	78.1774	82.8065	82.1	3.90323	3.44167	4.28226	5.72097	1.97333	8.07419	7.39667	7.10806	5.62097	6.3	5.10347	6.59071
21	train	Moravian-Silesian	2006	-66.0327	-65.0327	27.9673	-98.0327	-5.03273	10.4645	14.9183	19.5194	13.7113	13.605	15.5081	19.8317	25.4887	18.1081	19.515	6.1	10.185	13.7532	10.5419	9.065	74.9355	77.0167	63.871	84.871	78.1667	4.14194	3.63833	1.16452	6.1871	1.25	5.5871	7.21333	10.729	4.12258	7.30833	4.51681	4.40902
22	train	Moravian-Silesian	2007	-16.0327	-19.0655	-23.0655	-13.0655	-153.065	12.3565	15.855	16.5065	16.0081	9.47333	17.5177	21.28	21.9113	21.3968	13.9267	7.28065	11.3367	11.5629	11.3516	5.865	71.4516	71.4667	69.2419	72.8548	82.0667	2.15645	3.39833	3.00645	2.32581	8.54	6.58387	6.53667	7.1629	6.47258	4.59833	4.70736	3.27098
23	train	Moravian-Silesian	2008	-70.0327	-35.0327	-94.0655	-55.0327	-81.0655	11.1161	15.2667	15.6613	15.5145	10.1233	16.1274	20.6567	20.4323	21.0081	13.9417	6.55968	10.57	11.5694	11.0887	7.03333	76.7581	72.0833	74.5645	73.1613	81.1833	2.45323	3.645	6.50323	3.97903	3.445	6.28871	7.675	6.40484	7.41935	4.43667	5.25746	5.17038
24	test	Moravian-Silesian	2009	-40.0327	-135.033	-70.0327	-11.0327	28.9673	11.0581	12.9533	16.8355	16.3323	12.9383	16.6435	17.3533	22.3371	21.5806	18.1217	6.1	8.77667	12.129	11.7919	8.95	74.5968	82.8833	74.6935	74.7903	79.6167	3.0871	5.25667	4.11774	2.35968	1.125	6.46452	3.85667	7.82419	7.82903	5.71833	5.16071	4.99397
25	train	Moravian-Silesian	2010	-269.033	-74.0327	-115.033	-93.0327	-101.033	9.45645	14.3267	17.6806	15.4081	9.77333	13.1081	18.64	22.5694	20.2935	13.79	6.75161	10.03	13.1758	11.4452	6.69167	89.129	77.15	74.4839	81.2581	85	13.271	5.115	6.77258	5.67903	4.93167	1.84032	7.05167	7.46129	5.84032	4.04167	4.47316	4.30705
26	train	Moravian-Silesian	2011	-77.0327	-73.0327	-149.033	-40.0327	14.9345	10.8661	14.4833	14.4871	16.5242	13.2017	16.4613	19.0667	18.6355	21.6887	18.5917	5.39677	10.31	10.9403	12.1081	8.70833	69.2742	79	81.8548	75.7581	76.35	4.08548	4.83667	8.28065	3.12419	1.22667	8.73548	4.81333	4.61935	7.41935	7.33167	5.98661	6.68455
27	train	Moravian-Silesian	2012	-22.0327	-44.0327	-34.0327	3.93455	-29.0327	12.3065	15.2133	17.3435	16.7194	12.1617	18.0435	19.9567	22.7065	22.2274	17.1833	6.88871	10.7017	12.8516	11.9339	7.84333	65.7742	77	70.6774	68.4355	78.65	1.85806	5.74167	4.01452	2.19839	2.92167	7.62258	6.02833	6.46774	7.15484	5.20667	5.75386	5.93127
28	train	Moravian-Silesian	2013	-96.0327	-121.033	19.9673	12.9673	-74.0327	10.7387	14.1217	17.05	16.4887	9.38833	15.3516	18.3117	22.2242	21.9581	13.7933	6.98871	10.52	11.7774	11.5468	5.62	78.6935	82.5	68.9355	68.5806	82.9333	3.90645	6.24833	1.68065	2.27581	4.825	4.3129	4.875	8.62742	7.69194	3.80167	2.8807	2.55289
29	test	Moravian-Silesian	2014	-126.033	-50.0327	-52.0655	-82.0327	-84.0327	10.229	13.55	17.1065	14.0984	12.4417	14.9177	18.5783	22.4694	18.95	16.57	5.85645	8.83167	12.529	10.5274	9.39	77.6935	69	74.6613	81.371	84.0167	5.68871	2.695	4.5871	4.30806	4.60667	5.52258	7.28167	7.12581	4.90968	4.71667	5.29253	5.4567
30	train	Moravian-Silesian	2016	-43.0327	-20.0655	-91.0655	-32.0327	16.9345	11.4613	15.795	16.6516	15.0984	14.0967	16.7161	21.265	22.0016	20.1581	19.4017	6.7	10.905	12.2613	10.7952	9.77	73.2258	73.65	77.8387	79.0484	78.85	2.05323	2.255	5.67742	2.85161	1.79	6.39677	8.08167	6.27742	6.92581	6.87167	5.85756	7.15879
31	train	Moravian-Silesian	2017	-43.0327	-12.0655	-29.0327	-14.0655	-118.033	11.3758	16.0367	16.35	17.3419	10.3117	16.5242	21.5583	21.9355	23.4081	14.0967	6.89032	10.6167	11.8871	12.3532	7.59167	76.4839	66.5667	72.129	71.8226	86.45	3.1871	2.82	3.31935	2.59839	7.73833	6.13548	9.01833	6.93387	7.54355	2.845	4.8852	5.43413
32	train	Moravian-Silesian	2018	-0.0327267	-53.0655	-28.0327	24.9673	-24.0327	14.1726	15.0533	17.0452	18.7548	13.285	19.3694	19.88	22.1613	24.4355	18.5367	9.35	11.505	12.3242	13.6565	9.18	69.0968	79.6	72.7097	66.9677	73.8167	2.90484	5.07167	5.80484	1.95323	2.72333	7.98871	4.705	7.3	8.98226	6.70333	3.61718	5.74797
33	test	South Moravian	2002	-4.00786	-17.0079	-15.0157	-37.0079	-36.0079	17.0516	19.1333	20.8871	20.429	13.99	21.8742	24.2433	26.9	25.4097	18.7	12.0968	12.9967	14.9032	15.5452	9.63667	70.4839	67.6333	64.7097	71.871	72.2667	1.47742	2.72333	1.87097	2.94194	1.30667	7.6871	9.71333	9.29032	7.13548	5.81667	7.62939	9.12714
34	train	South Moravian	2003	-25.0079	55.9843	13.9921	61.9921	18.9921	17.1613	21.3167	20.3355	22.5065	15.3667	22.5419	26.5933	25.8968	29.2129	21.0633	11.3935	14.7333	14.3065	15.4161	9.60333	65.9677	61.7333	65.9355	54.6452	66	2.99355	1.99333	2.13226	1.19355	0.81	9.50645	10.64	7.42581	10.3323	7.16	5.75314	6.22802
35	train	South Moravian	2004	-8.00786	-32.0079	8.99214	40.9921	7.99214	13.0935	17.0033	19.1968	20.2	14.8967	18.1774	21.85	24.6032	26.4065	20.4567	7.5129	11.6233	13.3129	14.1355	9.43333	68.3871	74.6	69.4516	63.7419	67.4	0.503226	2.58333	1.13548	0.670968	1.33	6.46452	6.59667	7.44839	8.2871	6.89667	5.52439	6.07367
36	train	South Moravian	2005	-53.0079	-4.01573	-31.0079	-61.0079	-6.00786	14.8032	17.4833	19.0581	17.5161	15.4567	19.8903	22.2467	24.2548	22.5097	20.41	8.68387	12.0167	14.1	12.4194	11	67.2258	65.7333	70.1613	67.3226	68.4	3.13548	1.95	2.9871	2.75484	0.7	8.97419	9.01667	7.09355	6.91935	6.37333	7.72726	9.48914
37	train	South Moravian	2006	-50.0079	-25.0157	57.9843	-86.0079	17.9921	13.9452	18.3067	22.7032	16.2516	16.5	18.7806	23.0067	28.4065	21.0806	22.1333	8.7129	12.34	15.9548	11.9613	11.1133	63.2903	62.8333	54.6774	72.5161	65.5333	2.55161	2.33667	2.39032	4.66129	0.856667	6.39677	8.37	10.7484	5	8.03	6.55965	6.69868
38	test	South Moravian	2007	17.9921	1.99214	23.9921	28.9921	-67.0079	15.6516	20.0933	21.1129	20.8774	13.2967	20.9548	25.6167	26.8548	26.7839	18.2033	9.71613	14.16	14.5903	14.9065	8.74333	59.6129	64.1333	58.4516	59.3871	72.4333	1.40645	3.12333	1.14839	1.17742	2.93333	7.6129	7.98333	8.67419	8.01935	5.35333	6.66292	6.55125
39	train	South Moravian	2008	-27.0079	18.9921	4.99214	22.9921	-3.00786	15.4774	19.9333	20.3226	19.9387	14.42	20.5161	25.3767	26.1194	25.7548	19.07	9.34839	13.79	14.3065	13.9323	10.0367	64.7419	61.5333	62	62.129	68.4667	2.24516	1.19667	2	1.43871	1.28	7.08387	7.93667	7.02258	7.54839	5.18	8.63967	8.25041
40	train	South Moravian	2009	-0.0078633	-49.0157	-69.0079	7.99214	37.9921	15.4484	17.3133	20.4484	20.8839	17.2233	20.8258	22.1167	26.4065	26.4484	22.8333	9.5871	12.2233	14.1613	14.8065	11.88	63.2903	69.6667	68.1613	63.5484	68.0667	1.20968	3.31667	3.87419	0.829032	0.483333	7.4	5.94333	8.79677	8.63871	6.3	7.93433	7.68243
41	train	South Moravian	2010	-120.008	-54.0079	-50.0157	-63.0157	-55.0079	13.6065	18.5167	21.8677	19.2258	13.4733	17.4419	22.9233	27.2613	24.1548	18.05	10.4581	13.35	16.2194	14.0645	9.31333	79.7742	69.5	66.9032	75.0645	77.1	3.93548	2.81	4.39032	2.54839	2.30667	3	7.46	8.45161	7.20323	4.58667	7.44409	6.99728
42	train	South Moravian	2011	-20.0079	9.98427	-18.0079	16.9843	24.9921	15.1097	19.1767	18.8516	20.5194	17.2	20.6452	24.5133	23.671	26.4065	23.5233	8.25484	13.9133	14.1161	14.729	11.3167	61.4516	64.5333	66.2581	66.5161	64.9	1.42581	2.05333	2.9871	1.14839	1.02	9.52903	7.43	6.10968	7.8871	7.93333	9.38052	7.84894
43	test	South Moravian	2012	10.9921	-24.0079	-26.0157	25.9843	16.9921	16.871	19.64	21.0387	21.2871	16.19	22.8774	24.7267	27.2452	27.5548	21.5833	10.3903	13.8833	15.4774	14.7968	10.94	52.8065	65.8667	65.7097	58.6129	65.9333	0.906452	2.83	1.67419	1.86774	0.99	8.78065	7.23667	6.88387	8.40645	6.67333	9.17548	8.75814
44	train	South Moravian	2013	-61.0079	-86.0079	45.9921	2.99214	-22.0079	14.1032	17.9467	22.2129	20.9032	13.82	18.4581	22.6533	27.9258	26.6129	18.58	9.66774	13.0033	15.3	14.9613	9.4	73.9032	71.6667	55.3226	59	71.4333	4.43871	3.41667	0.13871	2.92903	2.00333	5.15161	6.64333	11.0419	8.51935	4.59	6.35692	4.78124
45	train	South Moravian	2014	-40.0079	17.9843	-4.00786	-52.0157	-111.008	14.4419	19.0633	21.7677	18.0323	15.6567	19.3839	24.45	27.6355	22.8903	20.0067	9.39355	12.2833	15.7742	13.4	11.7533	66.3548	53	62.0968	74.8387	79.4	2.47097	1.01667	3.12903	3.89677	4.04	5.26774	7.31333	6.41613	4.53226	3.88333	9.02261	8.13863
46	train	South Moravian	2015	-2.00786	37.9921	54.9921	2.99214	23.9921	14.5645	19.0167	22.9355	23.971	16	19.0032	24.3233	29.4032	29.829	20.81	9.38065	12.85	15.6581	17.5484	11.6567	66.7742	61.1333	55.2258	56.3226	66.0667	1.56129	1.4	1.27419	2.83871	0.516667	5.12581	8.35	9.52903	8.7129	4.98333	5.31399	6.1649
47	train	South Moravian	2016	-19.0079	22.9921	-42.0079	-3.00786	51.9921	15.5968	19.8467	21.2839	19.5839	18.2733	20.5129	25.0367	27.1323	24.9129	24.5333	9.70968	13.6833	15.3419	14.0387	12.06	65.9032	66.9333	66.0968	67.7742	66.5333	1.43226	2.48333	3.28387	1.97097	0.366667	7.19355	8.24	7.86774	7.9129	7.53333	9.32981	9.14362
48	test	South Moravian	2017	-6.00786	47.9921	2.99214	47.9921	-35.0079	15.9806	21.0233	21.2065	22.0806	14.0967	21.4774	27.28	26.9355	28.2581	18.6367	9.77419	13.7867	14.9968	15.5516	9.88333	62.7097	53.4	60	57.5484	75.5333	1.43548	1.16667	2.6	0.9	2.00333	8.72903	10.6667	7.55161	8.99677	3.65667	7.5705	7.20479
49	train	South Moravian	2018	21.9921	13.9921	35.9921	63.9921	-30.0079	18.5226	20.3933	22.3452	23.9194	17.2633	23.9419	25.8733	28.1677	30	22.59	12.6645	15.0833	15.7355	17.4484	11.8	61.7742	59.6	54.7742	51.4839	66.4667	1.55484	1.04667	1.99355	1.02258	2.87333	9.18387	6.49667	7.87097	9.40645	7.70667	5.7873	6.64744
50	train	Usti nad Labem	2002	-34.1464	-14.2927	-23.2927	-97.2927	-45.1464	12.4774	14.9933	15.7452	16.7032	9.54	19.4226	21.5133	22.2161	23.171	14.7233	8.45484	10.7467	11.6677	13.2065	6.78667	79.3871	76.1667	79.0968	81.5806	83.3333	1.19677	2.84333	2.20968	4.02581	1.21	6.69677	8.16333	7	7.60323	5.62333	7.72012	7.06537
51	train	Usti nad Labem	2003	-17.1464	39.8536	-20.1464	47.7073	30.8536	12.3677	17.1	16.2194	18.7161	12.1233	19.3742	24.4067	22.6968	25.8645	18.1533	8.05484	12.4933	12.3548	14.1774	8.41667	72.9032	67.2	74.1935	58.8387	72.4667	1.45806	1.30333	3.09355	0.209677	0.683333	7.63548	10.6667	7.46774	10.371	7.00333	5.45159	5.14354
52	train	Usti nad Labem	2004	-63.1464	-32.1464	-17.2927	1.70726	2.85363	8.61613	13.09	14.7355	16.2774	11.33	14.3613	19.4967	21.5323	22.9645	16.6367	5.1129	9.33333	10.8355	12.2968	7.68	79.4194	76.7333	77.5484	73.3548	77	2.35806	1.64	2.23226	1.34516	0.88	5.32258	5.99667	7.22903	7.27419	6.91667	5.03379	4.54313
53	test	Usti nad Labem	2005	-51.1464	-21.2927	-51.1464	-46.1464	-18.2927	10.7387	13.3933	15.7871	13.4806	12.6367	17.6645	19.5233	22.0742	19.1903	18.59	6.58387	9.32333	11.9194	10.3194	9.28	75.3226	73.5333	79.2258	82.5484	82.1667	2.58387	2.23	4.54194	2.95161	1.13667	7.57419	9.08	6.84194	6.34839	7.50333	7.35138	7.17996
54	train	Usti nad Labem	2006	-41.1464	-1.29274	55.8536	-38.1464	6.85363	10.6581	15.0267	20.5613	12.8548	14.03	17.0871	21.75	28.171	18.5387	20.0667	6.78387	10.4333	15.5613	10.1129	10.1933	69.9355	71.4667	62.2581	85.0645	80.4333	1.71935	1.61	1.55161	2.4	0.786667	7.04839	9.51	10.8935	4.61613	7.63333	6.31667	5.70739
55	train	Usti nad Labem	2007	-34.1464	-28.1464	-15.1464	-48.2927	-76.1464	12.3806	15.7867	15.5581	15.3484	9.45667	19.7032	22.6867	21.7194	21.7194	13.9533	7.72258	11.5467	12.0226	11.4	6.57333	72.3226	77.8667	77.8065	78.4839	88.2	4.6	2.23	3.06452	2.06452	2.95	8.14516	7.91	7.10645	7.34516	4.58333	6.46538	6.83837
56	train	Usti nad Labem	2008	-11.1464	3.85363	-0.146371	-4.29274	-2.29274	11.929	15.07	15.6516	15.2355	9.85667	18.6065	21.71	21.8581	21.3613	14.41	8.00645	11.2267	11.6677	11.4065	7.26667	74.6774	74	77.4194	77.871	86.6333	1.18065	1.49667	2.44839	2.23871	1.71	8.09355	8.32333	7.19032	7.01613	4.69667	8.03436	7.05427
57	train	Usti nad Labem	2009	-55.1464	-52.1464	-49.2927	-18.2927	31.8536	11.2677	12.1767	15.8516	16.7097	13.0267	17.5903	17.7967	22.4387	23.1968	18.36	7.16452	8.78667	12.3613	12.5194	9.82	77.1613	81.3	76.3871	70.6774	80.7667	3.41935	2.17333	2.93548	1.67097	0.7	6.87742	5.46333	6.98387	9.65484	6.5	7.51558	6.58105
58	test	Usti nad Labem	2010	-82.1464	-14.1464	-48.1464	-152.146	-100.146	8.45484	14.46	18.3613	14.8	9.22667	13.2903	20.4667	24.7419	20.1839	13.3867	5.57742	10.1	14.1935	11.6484	6.92	84.4839	70.5667	68.0968	82.7419	87.4	2.81935	1.60667	4.60645	6.47742	3.76	3.22581	8.82333	8.69355	5.43871	4.33	6.89914	6.45986
59	train	Usti nad Labem	2011	-32.1464	-19.2927	-86.2927	-38.1464	-0.292742	11.7645	14.6633	13.9613	15.8645	13.43	19.0129	21.1767	19.4452	22.0742	18.79	7.02903	10.5467	10.5323	12.271	10.0533	64.5806	72.0333	77.8387	77.2581	78.1333	2.00968	1.95	5.45161	1.92903	1.75667	9.43226	7.56	5.87419	6.87097	7.25333	8.83812	7.47642
60	train	Usti nad Labem	2012	-12.1464	-5.14637	-63.2927	-19.1464	4.85363	12.7323	14.0633	15.6323	16.6226	11.7533	19.8032	20.6333	21.6452	23.1806	17.1367	8.1871	9.94333	12.4742	12.6774	8.38667	63.9677	74.9667	76.5161	67.7419	77.0667	1.56452	2.28667	4.14194	1.97742	0.923333	8.64839	6.61667	6.76452	8.49355	7.21333	8.6029	6.8223
61	train	Usti nad Labem	2013	-106.146	-111.146	14.8536	-30.1464	-51.1464	9.67742	13.96	17.9452	15.971	9.76667	15.2452	19.58	24.4774	22.4452	13.94	6.35161	10.12	13.7935	12.3613	7.20333	81.8387	76.1	65.3871	69.4839	84.8333	4.4	2.87	1.20323	2.63871	1.97667	4.27742	6.77667	9.94516	7.76774	4	5.50415	4.25633
62	train	Usti nad Labem	2014	-79.1464	-4.14637	-36.1464	-48.1464	-56.2927	9.55161	13.8567	17.2613	13.7258	12.3333	15.6613	20.2167	23.3516	19.2548	16.65	6.07419	10.05	13.5387	10.7935	9.75	79.0968	68.1333	72.5806	76.4516	87.3667	2.89677	0.953333	2.51613	2.30645	2.11667	5.60323	7.22667	5.86452	3.83871	3.58333	8.30882	7.49181
63	test	Usti nad Labem	2015	-8.14637	-32.1464	3.85363	-2.14637	14.7073	10.0839	12.7433	17.3161	19.329	10.54	15.9161	18.4333	23.4323	25.4839	15.23	6.09355	8.96667	13.0677	14.8581	7.74	68.3226	76.5667	66.871	65.9355	80.8333	1.25161	2.91667	1.35161	2.65484	0.863333	6.90645	6.66667	9.20323	9.13548	5.14333	4.39431	5.15045
64	train	Usti nad Labem	2016	-22.1464	-43.1464	-45.1464	2.70726	-21.1464	11.3742	15.1467	16.2226	15.2097	14.9167	17.9097	21.1867	21.7484	20.8323	19.45	7.37097	11.6867	12.7516	11.5258	11.7767	71.9032	78.3333	75.9677	75.3871	75.5333	1.23226	3.32667	2.76129	1.32258	3.78333	5.73226	5.47	5.58065	6.86129	6.26333	8.75046	8.58804
65	train	Usti nad Labem	2017	-8.14637	-14.1464	-19.2927	-27.2927	-24.2927	12.0161	15.4833	15.9677	16.0871	9.73667	18.4387	22.1833	22.1194	21.8645	13.5733	7.70323	11.1567	12.4387	12.2742	7.43667	71.7097	69.3	77.5484	76.3871	87.4333	1.59032	2.68333	2.26452	2.72258	1.23667	7.41935	9.62	6.40968	7.63226	3.46	7.15492	7.67349
66	train	Usti nad Labem	2018	2.85363	18.8536	60.8536	44.8536	10.8536	14.3645	15.26	18.5	18.8516	13.5	21.2516	21.71	25.2194	26.3	19.3533	9.64839	11.44	13.6548	14.1839	9.9	69.4516	74.7667	58.7097	62.2258	70.9	0.790323	0.896667	0.409677	1.6	1.51667	9.64194	7.25333	9.94194	8.57419	6.89333	5.42121	5.04869
67	train	Vysočina	2002	-10.8781	-25.8781	-38.7563	-136.756	-36.8781	8.94096	10.0213	12.2734	16.3758	14.1967	13.3419	15.2499	17.5086	21.6887	19.1917	4.85645	5.0993	7.36371	11.5726	9.28	76.0536	74.4661	71.8484	74.7419	75.8833	1.75225	2.07672	1.74516	4.0629	2.25667	5.67725	7.01839	6.48183	6.97258	7.39833	7.66976	5.61276
68	test	Vysočina	2003	-80.8781	22.1219	0.121862	47.1219	14.1219	5	11.1785	12.5485	17.6677	16.375	10.2458	17.0311	18.2999	24.3581	22.4367	-0.047235	5.8829	6.83392	11.1935	10.2633	74.2604	68.9065	64.7108	62.5806	64.3167	1.7659	0.75371	1.57484	2.26613	1.33833	6.62356	7.88414	7.21968	9.67097	8.96333	3.1969	1.21036
69	train	Vysočina	2004	-38.8781	-39.7563	-20.8781	10.1219	-12.8781	5.64689	8.5786	12.7281	14.4323	13.7517	9.70729	13.1323	18.0861	20.2468	19.1383	1.68376	4.01355	7.44048	9.09032	8.63	77.8109	77.5898	74.0495	72.0645	75.6833	1.66691	2.11339	1.63306	1.93065	2.49	4.06274	5.08446	6.73505	7.15484	6.45333	2.18154	3.10216
70	train	Vysočina	2005	-50.8781	-3.75628	-77.8781	-63.8781	-31.8781	3.62114	7.51677	12.4848	13.4968	14.11	8.23721	12.347	17.8097	19.1016	19.46	-0.8375	2.35651	7.42	8.14032	8.885	85.1417	75.2333	73.0478	75.8871	75.2333	2.91555	0.962527	3.46812	2.16129	1.88333	5.19718	6.55274	6.72409	7.22258	7.29333	4.42267	4.59179
71	train	Vysočina	2006	-77.8781	-47.8781	32.2437	-108.878	18.1219	4.09752	7.57054	13.6754	13.0048	15.345	8.29194	12.2209	19.7354	17.9468	20.7367	-0.211924	2.92237	7.915	8.60161	10.0117	79.212	79.8382	73.4263	77.129	74.4167	2.15121	2.42742	1.58683	3.91452	1.97667	4.78871	5.81376	7.49478	5.44677	8.2	4.09063	4.62144
72	train	Vysočina	2007	-14.8781	-5.75628	-3.87814	24.2437	-93.8781	8.1038	11.1792	14.0031	15.629	14.4583	12.3109	16.3258	20.0076	21.4113	19.83	3.74349	6.17516	7.61968	9.66774	9.27	83.2851	78.7866	65.2876	71.8387	77.1833	1.98197	1.91102	1.37032	1.58871	2.71167	5.16688	6.22548	8.73667	7.35323	6.27167	4.37271	3.92647
73	test	Vysočina	2008	-26.8781	7.12186	-15.8781	-7.75628	-3.87814	7.63192	9.78419	12.4653	15.3516	14.2867	12.2293	14.5654	17.676	20.6903	19.495	2.91385	5.04677	7.41285	9.38065	9.485	77.9032	78.822	77.8344	72.4194	74.4833	1.32481	1.8822	1.67333	1.97742	1.37667	5.99933	5.75866	5.86419	7.42581	5.95	4.1273	6.15169
74	train	Vysočina	2009	-25.8781	-99.7563	-83.8781	-37.8781	25.2437	5.49073	8.35328	14.6685	15.4548	14.305	9.09009	12.4847	20.6783	21.0258	19.6533	1.70789	4.76392	8.68194	9.74516	9.68167	83.235	81.8038	69.8602	72.6935	76.8	3.04626	3.56194	2.28435	2.35645	2.15667	4.01636	3.54726	8.50108	7.53548	5.78833	4.39627	3.47461
75	train	Vysočina	2010	-90.8781	-51.8781	-55.7563	-117.878	-79.8781	4.32598	9.13306	13.6189	13.8387	13.5583	7.62247	13.5148	19.0559	18.3032	18.0567	1.33065	4.47468	7.72849	9.89032	8.93667	83.7206	73.2753	70.8581	80.8065	76	2.23629	1.59925	2.87204	4.4629	2.57833	2.29343	6.40054	8.14409	4.17903	6.09167	3.45271	4.25504
76	train	Vysočina	2011	-7.87814	-13.7563	-62.7563	-21.8781	-14.8781	4.73929	9.98177	13.0291	15.4177	15.6033	9.37425	15.2602	18.2541	21.179	20.94	-0.295565	5.18919	8.05866	9.56613	10.5567	75.6267	72.364	73.2995	72.9839	76.9333	1.09522	1.97833	2.715	2.74677	2.76833	6.22938	6.70091	6.3986	8.03226	7.34	4.98846	4.51937
77	train	Vysočina	2012	-27.8781	-8.87814	-42.7563	-25.8781	5.12186	4.25456	11.0524	13.0883	16.2306	15.0767	8.56663	16.2195	18.3755	22.2177	20.2917	-0.56574	6.25683	8.1886	10.2274	9.82167	75.2147	75.6962	75.0495	69.5645	78.9	1.78637	1.23419	2.80478	2.0371	2.03167	6.11285	6.40715	6.28022	8.1871	6.24333	4.69372	5.47897
78	train	Vysočina	2014	-97.8781	-1.87814	-11.8781	-57.7563	-88.8781	6.62437	10.7908	14.0126	13.4452	14.6017	10.83	16.2894	19.8442	18.2403	19.6467	2.91872	5.27769	8.54054	8.92903	9.65167	79.1538	67.7484	70.4409	75.8871	72.05	2.06308	1.19274	2.74242	4.51452	2.71333	4.57465	6.6857	6.35043	5.59677	6.56333	3.94946	3.61943
79	train	Vysočina	2016	-33.8781	-0.756275	-39.8781	13.1219	49.1219	7.80656	9.74462	12.688	14.8806	16.4683	11.8377	14.1157	18.3125	20.2468	22.2633	3.89294	5.48199	7.43747	9.57258	10.6667	74.4605	75.4914	69.1484	68.4355	68.8833	1.53515	1.48747	1.86968	1.70645	1.62167	4.29449	4.54898	5.98473	6.78871	6.97167	4.78528	4.91023
80	train	Vysočina	2017	-10.8781	13.1219	-29.8781	2.24372	-24.8781	7.13894	11.5732	12.2365	16.2645	14.8483	11.9592	16.9685	17.3888	21.9903	19.8583	2.55029	6.12715	7.51468	10.2645	9.65	75.3894	71.6027	74.9118	68.3871	70.9667	0.892857	1.80328	3.88694	1.20161	2.7	5.39361	7.06855	5.05296	8.22097	6.625	4.12385	4.57759
81	test	Vysočina	2018	9.12186	-7.87814	33.2437	51.1219	-24.8781	5.86797	8.62446	15.9988	18.3677	15.8433	10.2146	13.2485	22.6638	24.7226	21.7217	1.25691	4.42968	8.97441	11.6161	10.3567	75.1509	76.686	61.8989	62.4032	71.4833	1.26843	1.47183	0.468387	1.49516	1.945	6.23992	4.57995	8.41242	8.47742	6.615	2.93865	3.18817
82	train	Plzen	2002	-41.3135	-49.6271	-44.3135	-172.627	-62.3135	12.5387	16.1333	15.9	16.6645	10.5033	17.6129	21.03	20.7903	21.1387	14.9	8.47419	11.7967	11.771	13.6258	7.2	77.9677	72.1	79.7419	84.7742	83.9667	2.22258	2.23333	2.11613	5.79677	2.65667	6.40968	8.95333	6.40323	6.38065	5.76333	8.38956	7.00112
83	train	Plzen	2003	-27.3135	18.6865	1.68646	59.6865	24.6865	13.0806	18.7467	17.1419	20.4613	13.08	19.7774	25.7033	24.1032	28.1387	19.1633	8.47742	13.34	12.7871	14.7516	8.49667	74.3871	64.6667	70.7419	54.2903	68.2	1.80968	2.00333	1.89677	0.670968	0.99	7.24194	10.9267	8.46129	10.5387	7.32667	4.75058	4.20616
84	train	Plzen	2004	-62.3135	-70.3135	-47.3135	-13.6271	-27.3135	9.73871	13.7233	15.6548	16.6452	12.07	15.6839	19.4433	21.1645	22.3452	17.0833	5.78065	9.43333	11.2548	12.6032	8.18	74.9355	74.0333	75.9677	74.7097	76.8333	1.86774	2.62667	2.73871	2.67742	2.84333	6.17742	6.96	7.39677	7.76452	6.41	3.37997	3.95435
85	train	Plzen	2005	-58.3135	-31.6271	-43.6271	-61.3135	-22.3135	11.729	15.33	16.5548	13.9516	13.02	17.1645	21.0533	22.0806	18.6935	17.9	7.2129	10.4533	12.471	10.6323	9.65333	70.7097	66	74.4516	81.6452	81.7333	2.2	1.63	2.76452	2.82581	0.983333	8.07742	9.24333	6.84516	5.73226	6.43667	6.55204	6.03669
86	test	Plzen	2006	-120.314	-48.3135	17.3729	-55.3135	2.68646	11.3581	16.3167	20.8258	12.9806	14.8433	17.2903	22.2133	27.5839	18.7613	20.6767	7.26452	11.44	15.6387	9.98065	10.4567	72.3226	66.8333	63.7419	83.6452	76.9	4.92903	1.85333	2.52903	3.97419	0.93	7.09677	8.80333	11.0516	4.30323	8.08667	6.00933	4.58117
87	train	Plzen	2007	-55.3135	-42.3135	-46.6271	-32.3135	-54.6271	12.2806	15.54	15.4839	15.5774	10.3167	17.7129	20.8567	20.5	20.8581	14.6633	7.71613	11.7233	11.8355	11.6484	7.23	72	78.2667	77.7097	76.9677	85.3333	3.59032	3.54333	3.05806	1.87419	3.09	7.41935	6.72333	6.87097	7.0871	5.25333	6.39353	5.39076
88	train	Plzen	2008	-14.3135	11.6865	4.68646	1.68646	-13.3135	12.5129	15.9233	16.1968	15.6774	10.23	17.8452	21.3367	21.6774	21.0516	14.4967	8.29677	11.6	12.229	11.7613	7.60333	74.9677	73.8	74.5806	73.6774	83	1.02903	0.966667	2.05161	1.45161	2.52333	8.04839	7.96	7.1129	7	4.90667	6.23796	7.13308
89	train	Plzen	2009	-71.3135	-70.3135	-74.3135	-6.31354	24.6865	11.9161	13.1233	16.0774	17.1452	13.33	16.7387	17.7667	21.1871	22.3129	17.7667	7.93548	9.44667	12.229	12.8258	10.2733	77.2903	77.1	76.9032	71.2903	80.8	2.26774	3.62	3.74516	1.60645	1	6.39032	6.04333	7.07742	8.70645	6.08667	6.53482	6.72093
90	train	Plzen	2010	-79.3135	-46.3135	-38.6271	-104.627	-45.3135	9.11935	15.0867	18.6839	14.5355	9.76667	13.1226	19.68	24.2161	19.1	13.7833	6.35161	11.1867	14.2	11.6226	6.80333	84.3548	70.4333	65.6129	82.1935	82.8667	3.25161	1.76667	2.99355	5.66452	2.07	2.89032	7.32	8.7871	4.48387	4.57667	5.23712	5.5627
91	test	Plzen	2011	-43.3135	-44.6271	-117.627	-41.3135	-0.627084	12.0871	14.57	13.871	16.3194	13.6333	18.0226	20.0267	18.6226	21.5355	18.1067	7.25161	10.53	10.2742	12.4323	10.2733	64.9677	76.3333	80.2903	80.2581	82	2.53226	2.34667	5.72903	3.38387	1.96	8.84839	5.78667	5.10323	6.35484	5.8	7.4477	7.84435
92	train	Plzen	2012	-16.3135	-12.3135	-66.6271	-38.3135	-4.62708	13.1774	14.82	15.4516	17.2258	12.18	18.8452	20.05	20.4871	22.4323	17.24	8.3871	10.5433	12.0968	12.8839	8.5	65.6452	78.0333	81.1613	69.5484	75.7333	0.793548	2.35667	3.21613	1.64516	1.01333	8.29355	5.96	6.27097	7.34194	6.25	7.03785	7.88687
93	train	Plzen	2013	-110.314	-96.3135	23.6865	-44.3135	-48.3135	9.3	13.8467	18.5871	16.3968	10.4367	13.6194	18.47	23.8516	21.6258	14.2467	6.42581	10.1833	13.8258	12.471	7.71667	86.8387	76.3	60.0968	69.7097	87.3333	4.61935	3.01667	0.419355	2.92903	2.76667	2.70645	6.12333	9.36774	7.35161	3.90333	2.19508	5.04459
94	train	Plzen	2014	-62.3135	0.686458	-48.3135	-64.3135	-61.3135	10.5677	15.2133	17.6935	14.1161	12.99	15.2548	20.4367	22.7161	19.1677	17.0767	6.78065	10.7533	13.6194	10.8677	10.34	75.2258	61.1	70.3226	79.2258	88.2333	2.95161	0.756667	4.82258	3.5129	2.18667	5.42258	8.28	6.63226	5.81935	3.47333	6.03448	5.8477
95	test	Plzen	2016	-22.3135	-63.3135	-63.3135	-8.31354	-3.31354	11.1968	14.8933	16.8677	15.8806	15.18	16.2355	19.8367	21.5355	20.8258	19.6433	7.22258	11.5367	12.9419	11.7677	11.7533	74.9032	81.5667	77.1935	76	79.1	1.33871	3.81333	3.62581	0.893548	3.2	6.02903	5.71	6.53548	8.17419	7.03333	7.173	7.06456
96	train	Plzen	2017	-23.3135	8.68646	6.68646	-2.31354	-8.62708	12.5742	16.8333	16.6613	17.1839	9.9	17.6645	22.49	21.6774	22.3548	14.0833	7.98065	11.9667	12.5161	12.9387	7.61	69.6452	64.8333	76.5161	73.5806	87	1.84194	1.52	2.50968	3.11935	1.99333	7.53871	9.09333	6.90323	7.15806	3.22	6.14092	7.55353
97	train	Plzen	2018	-9.31354	-13.6271	25.3729	48.6865	-8.31354	14.3742	15.94	19.129	19.3323	13.7333	19.3032	20.8333	24.7323	25.4452	18.69	10.0194	12.1633	14.4	14.5548	9.96333	72.5161	70.6	54.6129	58.0645	68.1	1.77419	2.20667	0.370968	1.7129	2.09667	8.26129	6.28667	8.64516	8.22581	7.30667	4.40996	5.70493
98	train	South Bohemia	2002	-10.8791	-45.8791	-68.8791	-268.879	-67.8791	14.5613	17.69	17.7742	18.2645	11.3633	20.0581	23.0533	23.3871	23.6935	16.5467	9.03871	11.5133	12.4097	13.6161	7.26333	73.2258	69.8667	73.3548	78.7419	80.9333	1.48065	2.78333	4.73226	6.76452	1.37333	7.19677	9.63	7.47419	6.82903	5.80667	7.79846	8.32317
99	train	South Bohemia	2003	-43.8791	-3.75828	6.12086	49.1209	25.1209	14.8903	20.04	18.7387	21.4387	13.9833	21.0161	26.27	25.1065	28.9	20.6733	8.88065	13.02	12.6677	14.1387	8.01333	66.0323	61.7	64.6774	52.0968	65.1667	1.79355	1.58333	1.45161	0.612903	0.456667	7.98387	10.6533	7.93871	10.5258	7.41	3.36868	4.2511
100	test	South Bohemia	2004	-54.8791	-99.7583	-32.8791	20.2417	-20.8791	11.2161	15.1267	16.6935	18.0452	13.0367	16.4	20.09	22.0839	24.3935	18.88	6.27419	9.98667	11.5452	12.5806	7.73	69.5161	71.8333	73.5484	67.7419	71.4	1.75806	4.52333	2.1871	1.67419	2.56333	6.04516	6.14	7.16129	8.15161	6.41	2.25907	1.99146
101	train	South Bohemia	2005	-52.8791	-25.7583	-85.7583	-90.8791	-58.8791	13.1484	16.53	17.8742	15.571	13.9333	18.7	21.6933	23.2548	20.7194	19.5633	7.17419	10.4367	12.5806	11.1032	9.46333	69.3226	65.5667	72.9355	78.0968	80.5	1.74839	2.39333	3.92581	2.43226	1.88333	8.3871	8.59	7.01935	5.83226	6.11333	4.66608	5.92979
102	train	South Bohemia	2006	-82.8791	-105.879	-9.87914	-79.8791	16.1209	12.371	16.9267	21.4226	14.7581	15.9233	17.5806	22.3633	27.9968	19.8	22.2567	7.4	10.97	14.7226	10.9419	10.3833	69.9355	70.3667	62.5484	75.2903	71.3	3.88065	2.45333	0.851613	2.81935	0.286667	6.84516	8.73667	10.3032	4.39032	7.88333	4.33035	5.11692
103	train	South Bohemia	2007	-30.8791	-16.8791	-8.87914	-19.7583	-111.758	14.2	17.89	17.8839	17.3097	10.87	19.8871	23.6	23.6677	23.1129	15.77	8.07097	12.1967	12.2613	12.0097	6.84	69.4194	70.9	69.8387	72.0323	82.2667	2.43871	2.25	2.29355	1.7	2.85333	7.97742	8.27333	7.38387	7.65806	4.97667	4.63763	4.32659
104	train	South Bohemia	2008	-33.8791	-2.75828	-17.8791	-20.7583	-15.7583	14.0903	17.84	18.4968	17.5226	11.7867	19.1774	22.9967	23.7645	23.4548	16.7867	8.08065	12.3367	13.0355	11.7839	7.51333	68.9032	69.3333	66.4516	69.9677	79.1333	1.00968	1.33	1.74194	3.04194	1.13333	7.6	7.95	7.47419	8.15806	5.02	4.31897	5.16473
105	test	South Bohemia	2009	-68.8791	-138.879	-74.8791	-46.8791	6.24172	13.1968	14.7967	17.9516	18.5323	14.6267	17.8839	19.3167	23.8387	24.329	19.9633	8.13226	10.3533	12.8194	12.7387	9.97	75.9677	75.6333	74.4839	69.3226	77.1667	2.43548	2.22333	3.4871	1.32581	0.743333	6.99355	6.70333	8.24194	9.07419	6.05667	4.63194	3.60318
106	train	South Bohemia	2010	-94.8791	-62.8791	-80.8791	-98.8791	-48.8791	11.0226	16.18	19.7065	16.5129	10.92	15.1065	20.7467	25.2	21.2452	15.3367	7.63871	11.2967	13.6903	12.1065	6.95667	80.2258	69.2667	65.5484	76.6129	80.7	2.6129	2.50333	2.84194	4.4	1.23333	4.32258	7.69667	9.19032	5.96452	4.87333	3.60768	4.17457
107	train	South Bohemia	2011	-57.8791	-38.7583	-92.7583	-18.8791	-8.87914	13.4742	16.5033	15.6742	17.5613	14.5667	19.1258	21.6867	20.5903	23.3968	19.8933	6.89677	11.4833	11.3548	12.3387	9.54667	63.5484	70.1333	75.7097	75.7742	77.9	2.10968	2.66333	5.31613	3.06452	1.1	9.32581	7.54	6.00645	7.41935	7.01333	5.2465	5.82013
108	train	South Bohemia	2012	-27.8791	-40.8791	-95.8791	-82.8791	-34.8791	14.1935	16.8633	17.4613	18.0258	12.9333	19.6581	21.9133	22.8903	24.2613	18.09	8.00968	11.3467	12.9548	12.1032	7.87667	60.7419	69.8667	74.6774	69.0645	78.9	1.12258	2.25667	3.4129	3.76452	1.22667	8.51613	6.51	6.85806	8.32903	5.50667	4.92784	4.89837
109	test	South Bohemia	2014	-113.879	-0.87914	-47.8791	-76.8791	-75.8791	11.5613	15.99	19.0871	15.6065	13.9133	16.4	21.6433	24.9935	21.1387	18.6033	7.07419	9.73667	13.2484	10.4839	10.32	76.9677	63.7	69.6774	77.4839	86.1	3.36774	1.45667	2.81935	3.02903	1.96667	6.50968	9.18333	8.65806	5.80968	4.24667	4.11412	5.62065
110	train	South Bohemia	2016	-72.8791	-61.8791	-100.879	-2.87914	24.1209	13.0839	16.6933	18.5032	17.3419	16.1467	18.2581	22.1733	23.9065	23.5258	22.35	8.21935	11.7233	13.1774	11.4226	10.6333	68.4839	73.9667	72.129	70.6452	74.2	2.7129	2.39667	4.23226	1.23226	1.35333	6.35484	6.70333	7.00968	8.1871	7.22333	5.02457	6.07744
111	train	South Bohemia	2017	-17.8791	15.1209	-25.8791	-47.7583	-17.7583	14.1065	18.8933	18.8452	19.2968	11.6567	19.6065	25.05	24.5355	25.9	16.62	7.96129	11.84	13.3871	13.1742	7.45667	68.6129	58.6667	69.2258	67.0323	82.2333	1.23548	2.18	1.6129	1.94839	1.09	8.17097	9.94	7.24516	8.22581	3.18	4.34173	6.10485
112	train	South Bohemia	2018	-27.8791	-65.7583	-2.87914	27.1209	-15.8791	15.9806	17.4567	19.8968	20.9903	14.56	21.9935	22.5433	26.2355	28.171	20.7867	10.4774	12.5367	13.1968	13.871	9.23667	68.129	70.1667	60.8065	56.9677	72.5667	2.21935	2.39333	2.14194	0.483871	1.99667	8.57419	6.68	8.85484	8.60645	7.36	3.08417	4.94314
113	train	Central Bohemia	2002	-21.3474	-20.3474	-34.6948	-105.695	-43.3474	12.5339	17.3017	18.7847	19.2817	16.1542	21.5032	23.3633	24.3839	24.9226	17.8867	10.629	12.8633	13.6839	14.5774	8.83333	70.9032	71.7667	73.4839	79.9355	79.8667	2.68387	4.77	3.92258	6.04839	2.50667	7.4129	9	7.82581	7.20645	5.48667	8.02197	9.66282
114	test	Central Bohemia	2003	-33.3474	35.3052	2.65262	55.6526	25.6526	12.3644	18.3254	20.2983	20.7667	18.2254	21.6	26.4633	25.3032	28.2355	20.4667	9.98065	13.8733	13.8677	14.2613	8.78	66.1613	60.3333	64.9677	54.9677	67.3333	1.79032	0.813333	1.82581	1.19355	0.5	8.49355	10.88	7.6129	10.1419	6.27333	5.75087	5.5292
115	train	Central Bohemia	2004	-24.3474	-37.6948	-13.3474	21.6526	5.65262	11.6746	14.9593	18.1983	19.7267	17.5831	18.0226	22.09	24.9968	26.2774	20.47	7.71613	11.5667	13.3452	14.3032	9.28333	63.3871	67.1333	63.1613	61.7097	66.6	1.23871	2.54	1.11613	2.08387	1.43667	6.32581	6.67667	7.76774	7.62581	6.55	5.08193	4.95112
116	train	Central Bohemia	2005	-32.3474	-1.69477	-58.3474	-35.3474	7.30523	12.8271	16.3915	18.8966	18.4683	16.4915	20.5	23.0467	24.9032	22.4226	21.5933	8.76129	12.0467	14.0903	12.5323	10.3633	63.1613	60.5	69.2258	71.4194	72.8667	1.37742	1.71333	4.36129	2.42581	0.46	8.02581	8.07	6.50645	5.80645	6.1	7.78805	8.66595
117	train	Central Bohemia	2006	-69.3474	-43.3474	45.3052	-48.3474	17.6526	11.9915	16.6508	21.3119	20.0783	17.0983	19.5968	23.8	29.9516	21.729	23.8233	8.82258	12.2633	16.0774	12.7677	11.74	62.7419	63.1	56.3871	72.4194	66.4	3.09032	2.75333	0.36129	3.42581	0.146667	7.16129	8.76667	10.7161	4.13548	7.27667	6.77792	6.44649
118	train	Central Bohemia	2007	-4.34738	0.305235	-1.34738	-3.69477	-47.6948	14.5288	18.2305	20.0339	19.5633	16.1271	21.8903	25.6067	25.5839	25.0677	17.95	10.1516	13.8533	14.4516	13.9839	8.76	58.7419	62.5667	60.0968	66.6129	73.7333	1.73548	2.12	1.83871	3.23871	2.84667	7.34516	7.53667	7.03871	6.92903	4.76333	6.99252	7.56278
119	test	Central Bohemia	2008	-30.3474	14.3052	2.65262	5.65262	23.6526	12.2288	17.0797	19.222	19.3583	16.5085	20.4806	24.4167	24.8419	25.3258	18.8567	8.96129	13.4267	14.0226	13.7548	9.22333	69.9355	65.6667	67.3226	63.3226	71.2667	2.33226	2.61667	2.68065	2.09355	0.576667	6.99677	7.76333	6.45806	6.89677	4.91333	8.30238	9.53073
120	train	Central Bohemia	2009	-31.3474	-52.3474	-41.6948	12.3052	44.6526	14.5508	15.7034	17.9661	20	18.4678	20.3355	21.2933	25.6742	26.8032	22.3633	9.49355	11.7933	14.5	13.9484	11.23	65.7742	69.3	67.4516	60.4194	67.8667	3.16452	2.67333	2.50323	0.716129	0.586667	6.08065	5.06	6.67419	8.2129	5.79667	7.92492	7.79082
121	train	Central Bohemia	2010	-80.3474	-21.3474	-12.3474	-94.6948	-75.3474	11.3746	15.4492	20.0661	19.96	15.3492	17.1581	22.82	27.4387	23.4871	17.1533	9.2871	12.2567	15.4	13.8097	8.31333	72.8387	63.7667	61.4839	73.3871	77.5667	3.04516	1.95333	3.02581	5.0871	3.00667	2.60968	8.31	8.82581	5.87419	4.90667	7.10221	6.72417
122	train	Central Bohemia	2011	-11.3474	-11.3474	-99.6948	-26.3474	12.6526	13.6644	16.9102	18.3322	18.5967	17.6	21.4226	24.0367	22.5387	25.3871	21.8333	7.86774	13.12	13.0032	13.8677	10.9167	59.871	62.2	67.4194	71.4516	72.7333	1.29355	2.93	4.8871	2.3871	0.846667	9.62258	8.36333	6.1129	7.38065	7.23333	9.26574	8.25163
123	train	Central Bohemia	2012	-10.3474	9.65262	-37.3474	-35.3474	3.30523	13.1797	17.5085	19.2695	19.9633	17.5407	22.2	24.1567	25.5871	27.2065	20.6433	9.55806	12.68	14.6258	13.8677	9.42333	57.6452	64.5	68.4839	61.9677	73.0333	2.32258	2.25333	3.14516	2.33548	1.45	8.63226	7.34667	7.46129	8.3129	6.5	8.97116	7.76725
124	test	Central Bohemia	2013	-95.3474	-128.347	4.65262	-35.3474	-36.3474	11.722	15.3678	19.6593	20.315	16.2797	17.8935	22.2433	27.3548	25.2968	18.2667	8.84516	12.2133	14.3839	13.0742	9.77333	76.2903	70.4	59.0645	67.3548	77.1667	4.90645	6.48667	1.36452	3.90323	1.47667	4.45161	6.69	9.59355	7.49677	3.95	5.21655	4.02622
125	train	Central Bohemia	2014	-93.3474	8.65262	-13.3474	-11.6948	-29.3474	12.6356	15.7814	19.7847	19.365	16.5288	18.7032	23.3967	27.2032	23.0097	20.8233	8.52903	11.3933	15.0871	12.6	11.4267	72.871	59.8333	67.1935	74.129	83.8333	3.2871	0.593333	5.55806	2.95806	2.73	5.68065	8.14333	7.85806	5.18387	4.47333	8.49155	8.01437
126	train	Central Bohemia	2015	-16.3474	5.65262	57.6526	20.6526	30.6526	12.1136	16.0814	20.039	22.9567	19.1203	19.5129	22.8533	28.7194	29.7774	20.44	8.6129	12.35	15.5452	16.6194	10.1233	65.3871	67.1667	55.7742	58.4194	67.5	1.15161	2.29	0.777419	2.05161	0.85	6	6.82333	8.42258	8.21613	5.06	3.90779	6.00912
127	train	Central Bohemia	2016	-32.3474	-8.69477	-25.6948	19.3052	26.6526	12.4203	17.2492	19.9119	19.9467	18.6017	20.7871	24.6867	26.6323	25.4742	24.4467	9.35484	13.6967	15.2065	13.0194	11.8933	63.0968	67.5333	64.0323	64.8387	67.0333	2.38065	2.08333	3.64194	0.825806	1.38333	6.54516	6.8	6.59355	7.52903	7.49	9.12831	8.63309
128	train	Central Bohemia	2017	-5.34738	-7.34738	-13.6948	-6.69477	3.30523	12.0119	17.9492	20.3712	20.3017	16.7305	21.1871	26.1967	26.0742	26.5419	18.23	9.34194	13.17	14.9645	14.5452	9.06	62.4194	54.2	63.8387	63.871	76	1.44839	3.55333	2.15484	2.86452	1.08	8.01613	9.73667	6.65806	7.95484	3.54	7.52641	7.25169
129	test	Central Bohemia	2018	16.6526	1.65262	58.6526	57.6526	6.65262	16.3847	18.5847	20.6966	22.3333	19.422	23.8581	24.79	28.271	29.5484	22.8567	11.3226	13.74	14.5581	15.7613	10.6233	58.7742	63.9333	50.7419	53.3226	65.8	1.19032	2.47	0.967742	0.980645	1.20333	9.15806	7.47667	9.64516	8.33226	6.72	5.6476	5.38893
130	train	Prague	2002	-21.3474	-20.3474	-34.6948	-105.695	-43.3474	15.3774	17.5733	18.7903	19.3323	12.6967	20.5903	23.0633	24.0677	24.6355	17.8033	9.70968	12.07	12.9871	14.1194	8.33667	74.6129	72.6	72.0323	77.4516	77.7333	1.90323	2.73333	3.22903	3.94194	1.45	7.33548	8.76333	7.67097	7.07419	5.34667	7.50062	8.88477
131	train	Prague	2003	-33.3474	35.3052	2.65262	55.6526	25.6526	15.2548	20.0767	19.0613	21.0806	14.31	20.8323	26.05	24.8226	27.8355	20.4133	9.32903	12.77	13.3129	13.7677	8.24	68.2581	60.7667	66.0968	53.7419	66.2	2.29355	0.853333	2.4	0.519355	0.823333	8.56774	11.11	7.64516	10.0419	6.45333	6.02806	4.99229
132	train	Prague	2004	-24.3474	-37.6948	-13.3474	21.6526	5.65262	11.9	15.8067	17.7032	19.0935	14.0233	16.9742	20.8667	23.4903	25.0581	19.6967	6.30968	10.4567	12.029	13	8.10333	69.5806	71.4	69.1935	64.5161	68.1333	1.53871	3.57333	1.59355	1.74194	1.12	6.7129	7.08333	7.93548	7.81935	6.59333	6.02322	4.41125
133	train	Prague	2005	-32.3474	-1.69477	-58.3474	-35.3474	7.30523	13.9645	16.5467	18.4935	16.5871	14.9767	19.2548	21.74	23.8323	21.5774	20.8267	8.3	10.9033	12.9645	11.5452	9.45333	66.3871	66.2	71.6129	73.871	74.7333	2.66452	2.17333	4.02903	1.77742	0.98	8.49032	8.6	7.00645	6.24839	6.52667	8.06246	6.97343
134	test	Prague	2006	-69.3474	-43.3474	45.3052	-48.3474	17.6526	13.4839	17.6767	22.3806	15.7871	16.6933	18.829	22.93	28.971	20.8742	22.88	8.03226	11.24	15.2258	11.9935	10.9633	63.7419	65.8333	59.4839	74.8065	69.9333	3.12903	1.96333	0.925806	2.98065	0.356667	7.25806	9.12	10.8581	4.2129	8.10667	6.75531	6.11112
135	train	Prague	2007	-4.34738	0.305235	-1.34738	-3.69477	-47.6948	15.1097	18.6267	18.6774	18.3484	12.4067	21.1258	24.4467	24.3903	24.0355	17.27	8.67742	12.7833	13.5	13.0774	8.17	62.9677	68.3333	65	68.3548	76	1.94194	2.57667	2.28387	2.66129	2.03667	7.82258	7.87333	7.20968	6.82581	5.05333	6.80411	7.32176
136	train	Prague	2008	-30.3474	14.3052	2.65262	5.65262	23.6526	14.0935	17.7433	18.5194	18.2194	12.7367	19.5452	23.2233	23.9258	24.129	17.77	8.09677	12.1333	12.9032	12.5935	8.28667	72.2903	68.4667	67.871	65.6774	73.9667	1.77097	2.2	2.37742	2.21613	0.613333	7.70968	8.18	6.8	6.87742	5.02667	9.23061	7.95924
137	train	Prague	2009	-31.3474	-52.3474	-41.6948	12.3052	44.6526	14.171	15.12	18.6258	19.6032	16.04	19.2871	20.11	24.5516	25.629	21.4433	8.49355	10.4533	13.6613	13.1742	10.8567	68.871	74.8667	70.6774	63.5161	69.9667	2.69355	2.99667	2.08065	0.729032	0.52	6.27097	5.52	6.95161	8.59032	6.28667	8.31683	7.90114
138	train	Prague	2010	-80.3474	-21.3474	-12.3474	-94.6948	-75.3474	11.8484	17.2467	20.9419	17.7129	12.25	15.9645	22.0233	26.6097	22.7387	16.7	8.59677	11.4333	14.5032	13.4226	7.94	78.0645	67.6667	64.7097	74.7097	77.5333	2.52581	1.92	4.12903	3.98387	2.41333	3.19355	8.27667	8.63548	5.28387	4.84	7.98061	7.31417
139	test	Prague	2011	-11.3474	-11.3474	-99.6948	-26.3474	12.6526	14.2194	17.6467	16.8484	18.6355	15.6333	20.229	23.13	21.7452	24.2903	21.2133	6.81935	12.1267	12.0677	13.3065	10.4233	62.0645	66.9667	71.9677	73.4839	75.0333	1.07742	2.17667	4.65484	1.76129	1.08667	9.53226	7.90333	5.29355	6.57419	7.10333	9.88803	8.49091
140	train	Prague	2012	-10.3474	9.65262	-37.3474	-35.3474	3.30523	15.2194	17.4867	18.5613	19.4194	14.1033	21.2194	23.2767	24.671	25.9677	19.7	8.18387	11.29	13.6806	13.2774	8.92333	61.6452	68.1333	71.5806	63.7742	74.6	0.848387	1.24	3.60645	2.01935	1.8	8.38387	6.84	6.67742	7.85806	6.50667	9.72099	7.47323
141	train	Prague	2013	-95.3474	-128.347	4.65262	-35.3474	-36.3474	12.0323	16.1933	20.1871	18.2032	12.5133	16.7484	20.89	25.9065	24.071	17.17	7.60968	10.73	13.271	12.0903	8.68667	81.1935	76.3	64.3548	68.9677	78.5333	4.23226	5.01	1.6129	4.67097	1.13667	4.1871	6.87	9.91613	7.98387	4.25333	7.26761	4.65384
142	train	Prague	2014	-93.3474	8.65262	-13.3474	-11.6948	-29.3474	12.2548	16.4533	19.8484	16.4548	14.7667	17.2677	21.8467	25.5355	21.5839	19.5967	7.20645	9.97333	13.9258	11.4258	10.6767	76	64.0667	68.9677	72.6774	82.2333	3.8871	0.706667	5.26129	1.76452	2.69	6.31935	8.40333	7.80968	5.3129	4.64333	9.73512	7.47729
143	train	Prague	2015	-16.3474	5.65262	57.6526	20.6526	30.6526	13.2226	16.2867	20.9194	22.3968	13.7633	18.1581	21.5233	27.0452	28.0387	19.3333	7.7129	10.9267	14.3258	15.6903	9.14667	66.0323	68.6667	57.4839	59	69.4	1.31613	1.12667	1.54194	2.02581	0.3	6.39032	6.62	8.5871	8.63548	5.14667	6.31684	5.65096
144	test	Prague	2016	-32.3474	-8.69477	-25.6948	19.3052	26.6526	14.1258	17.6867	19.3742	18.4806	17.41	19.4774	23.03	25.071	24.3387	23.1367	7.81613	12.2967	13.7806	12.1484	11.6167	66.5484	73.1	68.3226	65.3871	68.0667	1.77742	2.46333	1.71613	1.50645	1.01667	7.36774	7.01	6.76774	7.86129	7.51667	9.88117	8.92581
145	train	Prague	2017	-5.34738	-7.34738	-13.6948	-6.69477	3.30523	14.4387	18.83	19.3065	19.3258	12.5467	19.9742	24.82	24.9194	25.0387	17.2667	8.16452	11.7633	13.871	13.5968	8.7	66.129	59.5	66.6774	66.5484	77.8667	1.07097	3.88333	2.13548	2.53548	0.79	8.55161	9.95	6.76129	8.02258	3.74	7.95419	6.5747
146	train	Prague	2018	16.6526	1.65262	58.6526	57.6526	6.65262	16.9387	18.1	21.4129	21.8677	15.8833	22.5065	23.1967	27.4097	28.3032	21.96	9.89355	12.7267	13.7613	14.9516	10.4033	62.2581	68.3333	51.3226	54.9355	64.6667	0.967742	3.48333	0.522581	1.61613	1.22	9.42258	7.65333	9.85806	8.69355	6.92667	6.13715	5.94141

## Sheet: Table S4
Table S4. The newly predictive yeilds of silgae maize in different regions of Czechia by ELM1 model
No.	1	2	3	4	5	6	7	8	9	10	11	12	13	14	15	16	17	18	19	20	21	22	23	24	25	26	27	28	29
Climate factor	water deficit	water deficit	water deficit	water deficit	Temp. Mean	Temp. Mean	Temp. Mean	Temp. Mean	Temp. Max	Temp. Max	Temp. Max	Temp. Max	Temp Min	Temp Min	Temp Min	Temp Min	humidity	humidity	humidity	humidity	precipitation	precipitation	precipitation	precipitation	Sunshine	Sunshine	Sunshine	Sunshine	Predictive Yield t/Ha
Units	(mm)	(mm)	(mm)	(mm)	（℃）	（℃）	（℃）	（℃）	（℃）	（℃）	（℃）	（℃）	（℃）	（℃）	（℃）	（℃）	(%)	(%)	(%)	(%)	(mm)	(mm)	(mm)	(mm)	(hours)	(hours)	(hours)	(hours)
Month	5	6	7	8	05	06	07	08	05	06	07	08	05	06	07	08	05	06	07	08	05	06	07	08	05	06	07	08
Average	-42.7551	-26.762	-24.5691	-24.4115	12.0672	15.6048	17.8357	17.6585	17.623	21.1825	23.6788	23.4162	7.29851	10.6487	12.6446	12.4982	71.0734	70.1437	68.708	70.0448	2.35353	2.48997	2.82668	2.65539	6.68045	7.38278	7.58479	7.28899
1	-42.7551	-26.762	-74.5691	-24.4115	12.0672	15.6048	17.8357	17.6585	17.623	21.1825	23.6788	23.4162	7.29851	10.6487	11.6446	12.4982	71.0734	70.1437	68.708	70.0448	2.35353	2.48997	2.82668	2.65539	6.68045	7.38278	7.58479	7.28899	35.8845
2	-42.7551	-26.762	-64.5691	-24.4115	12.0672	15.6048	17.8357	17.6585	17.623	21.1825	23.6788	23.4162	7.29851	10.6487	11.6446	12.4982	71.0734	70.1437	68.708	70.0448	2.35353	2.48997	2.82668	2.65539	6.68045	7.38278	7.58479	7.28899	35.4939
3	-42.7551	-26.762	-54.5691	-24.4115	12.0672	15.6048	17.8357	17.6585	17.623	21.1825	23.6788	23.4162	7.29851	10.6487	11.6446	12.4982	71.0734	70.1437	68.708	70.0448	2.35353	2.48997	2.82668	2.65539	6.68045	7.38278	7.58479	7.28899	35.1265
4	-42.7551	-26.762	-44.5691	-24.4115	12.0672	15.6048	17.8357	17.6585	17.623	21.1825	23.6788	23.4162	7.29851	10.6487	11.6446	12.4982	71.0734	70.1437	68.708	70.0448	2.35353	2.48997	2.82668	2.65539	6.68045	7.38278	7.58479	7.28899	34.7827
5	-42.7551	-26.762	-34.5691	-24.4115	12.0672	15.6048	17.8357	17.6585	17.623	21.1825	23.6788	23.4162	7.29851	10.6487	11.6446	12.4982	71.0734	70.1437	68.708	70.0448	2.35353	2.48997	2.82668	2.65539	6.68045	7.38278	7.58479	7.28899	34.4631
6	-42.7551	-26.762	-24.5691	-24.4115	12.0672	15.6048	17.8357	17.6585	17.623	21.1825	23.6788	23.4162	7.29851	10.6487	11.6446	12.4982	71.0734	70.1437	68.708	70.0448	2.35353	2.48997	2.82668	2.65539	6.68045	7.38278	7.58479	7.28899	34.1679
7	-42.7551	-26.762	-14.5691	-24.4115	12.0672	15.6048	17.8357	17.6585	17.623	21.1825	23.6788	23.4162	7.29851	10.6487	11.6446	12.4982	71.0734	70.1437	68.708	70.0448	2.35353	2.48997	2.82668	2.65539	6.68045	7.38278	7.58479	7.28899	33.8972
8	-42.7551	-26.762	-4.56909	-24.4115	12.0672	15.6048	17.8357	17.6585	17.623	21.1825	23.6788	23.4162	7.29851	10.6487	11.6446	12.4982	71.0734	70.1437	68.708	70.0448	2.35353	2.48997	2.82668	2.65539	6.68045	7.38278	7.58479	7.28899	33.6511
9	-42.7551	-26.762	5.43091	-24.4115	12.0672	15.6048	17.8357	17.6585	17.623	21.1825	23.6788	23.4162	7.29851	10.6487	11.6446	12.4982	71.0734	70.1437	68.708	70.0448	2.35353	2.48997	2.82668	2.65539	6.68045	7.38278	7.58479	7.28899	33.4293
10	-42.7551	-26.762	15.4309	-24.4115	12.0672	15.6048	17.8357	17.6585	17.623	21.1825	23.6788	23.4162	7.29851	10.6487	11.6446	12.4982	71.0734	70.1437	68.708	70.0448	2.35353	2.48997	2.82668	2.65539	6.68045	7.38278	7.58479	7.28899	33.2314
11	-42.7551	-26.762	25.4309	-24.4115	12.0672	15.6048	17.8357	17.6585	17.623	21.1825	23.6788	23.4162	7.29851	10.6487	11.6446	12.4982	71.0734	70.1437	68.708	70.0448	2.35353	2.48997	2.82668	2.65539	6.68045	7.38278	7.58479	7.28899	33.0568
12	-42.7551	-26.762	-74.5691	-24.4115	12.0672	15.6048	17.8357	17.6585	17.623	21.1825	23.6788	23.4162	7.29851	10.6487	11.8446	12.4982	71.0734	70.1437	68.708	70.0448	2.35353	2.48997	2.82668	2.65539	6.68045	7.38278	7.58479	7.28899	36.1428
13	-42.7551	-26.762	-64.5691	-24.4115	12.0672	15.6048	17.8357	17.6585	17.623	21.1825	23.6788	23.4162	7.29851	10.6487	11.8446	12.4982	71.0734	70.1437	68.708	70.0448	2.35353	2.48997	2.82668	2.65539	6.68045	7.38278	7.58479	7.28899	35.7397
14	-42.7551	-26.762	-54.5691	-24.4115	12.0672	15.6048	17.8357	17.6585	17.623	21.1825	23.6788	23.4162	7.29851	10.6487	11.8446	12.4982	71.0734	70.1437	68.708	70.0448	2.35353	2.48997	2.82668	2.65539	6.68045	7.38278	7.58479	7.28899	35.359
15	-42.7551	-26.762	-44.5691	-24.4115	12.0672	15.6048	17.8357	17.6585	17.623	21.1825	23.6788	23.4162	7.29851	10.6487	11.8446	12.4982	71.0734	70.1437	68.708	70.0448	2.35353	2.48997	2.82668	2.65539	6.68045	7.38278	7.58479	7.28899	35.0011
16	-42.7551	-26.762	-34.5691	-24.4115	12.0672	15.6048	17.8357	17.6585	17.623	21.1825	23.6788	23.4162	7.29851	10.6487	11.8446	12.4982	71.0734	70.1437	68.708	70.0448	2.35353	2.48997	2.82668	2.65539	6.68045	7.38278	7.58479	7.28899	34.6666
17	-42.7551	-26.762	-24.5691	-24.4115	12.0672	15.6048	17.8357	17.6585	17.623	21.1825	23.6788	23.4162	7.29851	10.6487	11.8446	12.4982	71.0734	70.1437	68.708	70.0448	2.35353	2.48997	2.82668	2.65539	6.68045	7.38278	7.58479	7.28899	34.3559
18	-42.7551	-26.762	-14.5691	-24.4115	12.0672	15.6048	17.8357	17.6585	17.623	21.1825	23.6788	23.4162	7.29851	10.6487	11.8446	12.4982	71.0734	70.1437	68.708	70.0448	2.35353	2.48997	2.82668	2.65539	6.68045	7.38278	7.58479	7.28899	34.0692
19	-42.7551	-26.762	-4.56909	-24.4115	12.0672	15.6048	17.8357	17.6585	17.623	21.1825	23.6788	23.4162	7.29851	10.6487	11.8446	12.4982	71.0734	70.1437	68.708	70.0448	2.35353	2.48997	2.82668	2.65539	6.68045	7.38278	7.58479	7.28899	33.8065
20	-42.7551	-26.762	5.43091	-24.4115	12.0672	15.6048	17.8357	17.6585	17.623	21.1825	23.6788	23.4162	7.29851	10.6487	11.8446	12.4982	71.0734	70.1437	68.708	70.0448	2.35353	2.48997	2.82668	2.65539	6.68045	7.38278	7.58479	7.28899	33.5678
21	-42.7551	-26.762	15.4309	-24.4115	12.0672	15.6048	17.8357	17.6585	17.623	21.1825	23.6788	23.4162	7.29851	10.6487	11.8446	12.4982	71.0734	70.1437	68.708	70.0448	2.35353	2.48997	2.82668	2.65539	6.68045	7.38278	7.58479	7.28899	33.3528
22	-42.7551	-26.762	25.4309	-24.4115	12.0672	15.6048	17.8357	17.6585	17.623	21.1825	23.6788	23.4162	7.29851	10.6487	11.8446	12.4982	71.0734	70.1437	68.708	70.0448	2.35353	2.48997	2.82668	2.65539	6.68045	7.38278	7.58479	7.28899	33.1609
23	-42.7551	-26.762	-74.5691	-24.4115	12.0672	15.6048	17.8357	17.6585	17.623	21.1825	23.6788	23.4162	7.29851	10.6487	12.0446	12.4982	71.0734	70.1437	68.708	70.0448	2.35353	2.48997	2.82668	2.65539	6.68045	7.38278	7.58479	7.28899	36.3991
24	-42.7551	-26.762	-64.5691	-24.4115	12.0672	15.6048	17.8357	17.6585	17.623	21.1825	23.6788	23.4162	7.29851	10.6487	12.0446	12.4982	71.0734	70.1437	68.708	70.0448	2.35353	2.48997	2.82668	2.65539	6.68045	7.38278	7.58479	7.28899	35.9839
25	-42.7551	-26.762	-54.5691	-24.4115	12.0672	15.6048	17.8357	17.6585	17.623	21.1825	23.6788	23.4162	7.29851	10.6487	12.0446	12.4982	71.0734	70.1437	68.708	70.0448	2.35353	2.48997	2.82668	2.65539	6.68045	7.38278	7.58479	7.28899	35.5901
26	-42.7551	-26.762	-44.5691	-24.4115	12.0672	15.6048	17.8357	17.6585	17.623	21.1825	23.6788	23.4162	7.29851	10.6487	12.0446	12.4982	71.0734	70.1437	68.708	70.0448	2.35353	2.48997	2.82668	2.65539	6.68045	7.38278	7.58479	7.28899	35.2183
27	-42.7551	-26.762	-34.5691	-24.4115	12.0672	15.6048	17.8357	17.6585	17.623	21.1825	23.6788	23.4162	7.29851	10.6487	12.0446	12.4982	71.0734	70.1437	68.708	70.0448	2.35353	2.48997	2.82668	2.65539	6.68045	7.38278	7.58479	7.28899	34.8692
28	-42.7551	-26.762	-24.5691	-24.4115	12.0672	15.6048	17.8357	17.6585	17.623	21.1825	23.6788	23.4162	7.29851	10.6487	12.0446	12.4982	71.0734	70.1437	68.708	70.0448	2.35353	2.48997	2.82668	2.65539	6.68045	7.38278	7.58479	7.28899	34.5433
29	-42.7551	-26.762	-14.5691	-24.4115	12.0672	15.6048	17.8357	17.6585	17.623	21.1825	23.6788	23.4162	7.29851	10.6487	12.0446	12.4982	71.0734	70.1437	68.708	70.0448	2.35353	2.48997	2.82668	2.65539	6.68045	7.38278	7.58479	7.28899	34.2407
30	-42.7551	-26.762	-4.56909	-24.4115	12.0672	15.6048	17.8357	17.6585	17.623	21.1825	23.6788	23.4162	7.29851	10.6487	12.0446	12.4982	71.0734	70.1437	68.708	70.0448	2.35353	2.48997	2.82668	2.65539	6.68045	7.38278	7.58479	7.28899	33.9617
31	-42.7551	-26.762	5.43091	-24.4115	12.0672	15.6048	17.8357	17.6585	17.623	21.1825	23.6788	23.4162	7.29851	10.6487	12.0446	12.4982	71.0734	70.1437	68.708	70.0448	2.35353	2.48997	2.82668	2.65539	6.68045	7.38278	7.58479	7.28899	33.7062
32	-42.7551	-26.762	15.4309	-24.4115	12.0672	15.6048	17.8357	17.6585	17.623	21.1825	23.6788	23.4162	7.29851	10.6487	12.0446	12.4982	71.0734	70.1437	68.708	70.0448	2.35353	2.48997	2.82668	2.65539	6.68045	7.38278	7.58479	7.28899	33.4742
33	-42.7551	-26.762	25.4309	-24.4115	12.0672	15.6048	17.8357	17.6585	17.623	21.1825	23.6788	23.4162	7.29851	10.6487	12.0446	12.4982	71.0734	70.1437	68.708	70.0448	2.35353	2.48997	2.82668	2.65539	6.68045	7.38278	7.58479	7.28899	33.2651
34	-42.7551	-26.762	-74.5691	-24.4115	12.0672	15.6048	17.8357	17.6585	17.623	21.1825	23.6788	23.4162	7.29851	10.6487	12.2446	12.4982	71.0734	70.1437	68.708	70.0448	2.35353	2.48997	2.82668	2.65539	6.68045	7.38278	7.58479	7.28899	36.6534
35	-42.7551	-26.762	-64.5691	-24.4115	12.0672	15.6048	17.8357	17.6585	17.623	21.1825	23.6788	23.4162	7.29851	10.6487	12.2446	12.4982	71.0734	70.1437	68.708	70.0448	2.35353	2.48997	2.82668	2.65539	6.68045	7.38278	7.58479	7.28899	36.2263
36	-42.7551	-26.762	-54.5691	-24.4115	12.0672	15.6048	17.8357	17.6585	17.623	21.1825	23.6788	23.4162	7.29851	10.6487	12.2446	12.4982	71.0734	70.1437	68.708	70.0448	2.35353	2.48997	2.82668	2.65539	6.68045	7.38278	7.58479	7.28899	35.8197
37	-42.7551	-26.762	-44.5691	-24.4115	12.0672	15.6048	17.8357	17.6585	17.623	21.1825	23.6788	23.4162	7.29851	10.6487	12.2446	12.4982	71.0734	70.1437	68.708	70.0448	2.35353	2.48997	2.82668	2.65539	6.68045	7.38278	7.58479	7.28899	35.4344
38	-42.7551	-26.762	-34.5691	-24.4115	12.0672	15.6048	17.8357	17.6585	17.623	21.1825	23.6788	23.4162	7.29851	10.6487	12.2446	12.4982	71.0734	70.1437	68.708	70.0448	2.35353	2.48997	2.82668	2.65539	6.68045	7.38278	7.58479	7.28899	35.0709
39	-42.7551	-26.762	-24.5691	-24.4115	12.0672	15.6048	17.8357	17.6585	17.623	21.1825	23.6788	23.4162	7.29851	10.6487	12.2446	12.4982	71.0734	70.1437	68.708	70.0448	2.35353	2.48997	2.82668	2.65539	6.68045	7.38278	7.58479	7.28899	34.7299
40	-42.7551	-26.762	-14.5691	-24.4115	12.0672	15.6048	17.8357	17.6585	17.623	21.1825	23.6788	23.4162	7.29851	10.6487	12.2446	12.4982	71.0734	70.1437	68.708	70.0448	2.35353	2.48997	2.82668	2.65539	6.68045	7.38278	7.58479	7.28899	34.4117
41	-42.7551	-26.762	-4.56909	-24.4115	12.0672	15.6048	17.8357	17.6585	17.623	21.1825	23.6788	23.4162	7.29851	10.6487	12.2446	12.4982	71.0734	70.1437	68.708	70.0448	2.35353	2.48997	2.82668	2.65539	6.68045	7.38278	7.58479	7.28899	34.1165
42	-42.7551	-26.762	5.43091	-24.4115	12.0672	15.6048	17.8357	17.6585	17.623	21.1825	23.6788	23.4162	7.29851	10.6487	12.2446	12.4982	71.0734	70.1437	68.708	70.0448	2.35353	2.48997	2.82668	2.65539	6.68045	7.38278	7.58479	7.28899	33.8445
43	-42.7551	-26.762	15.4309	-24.4115	12.0672	15.6048	17.8357	17.6585	17.623	21.1825	23.6788	23.4162	7.29851	10.6487	12.2446	12.4982	71.0734	70.1437	68.708	70.0448	2.35353	2.48997	2.82668	2.65539	6.68045	7.38278	7.58479	7.28899	33.5956
44	-42.7551	-26.762	25.4309	-24.4115	12.0672	15.6048	17.8357	17.6585	17.623	21.1825	23.6788	23.4162	7.29851	10.6487	12.2446	12.4982	71.0734	70.1437	68.708	70.0448	2.35353	2.48997	2.82668	2.65539	6.68045	7.38278	7.58479	7.28899	33.3695
45	-42.7551	-26.762	-74.5691	-24.4115	12.0672	15.6048	17.8357	17.6585	17.623	21.1825	23.6788	23.4162	7.29851	10.6487	12.4446	12.4982	71.0734	70.1437	68.708	70.0448	2.35353	2.48997	2.82668	2.65539	6.68045	7.38278	7.58479	7.28899	36.9054
46	-42.7551	-26.762	-64.5691	-24.4115	12.0672	15.6048	17.8357	17.6585	17.623	21.1825	23.6788	23.4162	7.29851	10.6487	12.4446	12.4982	71.0734	70.1437	68.708	70.0448	2.35353	2.48997	2.82668	2.65539	6.68045	7.38278	7.58479	7.28899	36.4667
47	-42.7551	-26.762	-54.5691	-24.4115	12.0672	15.6048	17.8357	17.6585	17.623	21.1825	23.6788	23.4162	7.29851	10.6487	12.4446	12.4982	71.0734	70.1437	68.708	70.0448	2.35353	2.48997	2.82668	2.65539	6.68045	7.38278	7.58479	7.28899	36.0476
48	-42.7551	-26.762	-44.5691	-24.4115	12.0672	15.6048	17.8357	17.6585	17.623	21.1825	23.6788	23.4162	7.29851	10.6487	12.4446	12.4982	71.0734	70.1437	68.708	70.0448	2.35353	2.48997	2.82668	2.65539	6.68045	7.38278	7.58479	7.28899	35.649
49	-42.7551	-26.762	-34.5691	-24.4115	12.0672	15.6048	17.8357	17.6585	17.623	21.1825	23.6788	23.4162	7.29851	10.6487	12.4446	12.4982	71.0734	70.1437	68.708	70.0448	2.35353	2.48997	2.82668	2.65539	6.68045	7.38278	7.58479	7.28899	35.2714
50	-42.7551	-26.762	-24.5691	-24.4115	12.0672	15.6048	17.8357	17.6585	17.623	21.1825	23.6788	23.4162	7.29851	10.6487	12.4446	12.4982	71.0734	70.1437	68.708	70.0448	2.35353	2.48997	2.82668	2.65539	6.68045	7.38278	7.58479	7.28899	34.9156
51	-42.7551	-26.762	-14.5691	-24.4115	12.0672	15.6048	17.8357	17.6585	17.623	21.1825	23.6788	23.4162	7.29851	10.6487	12.4446	12.4982	71.0734	70.1437	68.708	70.0448	2.35353	2.48997	2.82668	2.65539	6.68045	7.38278	7.58479	7.28899	34.582
52	-42.7551	-26.762	-4.56909	-24.4115	12.0672	15.6048	17.8357	17.6585	17.623	21.1825	23.6788	23.4162	7.29851	10.6487	12.4446	12.4982	71.0734	70.1437	68.708	70.0448	2.35353	2.48997	2.82668	2.65539	6.68045	7.38278	7.58479	7.28899	34.271
53	-42.7551	-26.762	5.43091	-24.4115	12.0672	15.6048	17.8357	17.6585	17.623	21.1825	23.6788	23.4162	7.29851	10.6487	12.4446	12.4982	71.0734	70.1437	68.708	70.0448	2.35353	2.48997	2.82668	2.65539	6.68045	7.38278	7.58479	7.28899	33.9826
54	-42.7551	-26.762	15.4309	-24.4115	12.0672	15.6048	17.8357	17.6585	17.623	21.1825	23.6788	23.4162	7.29851	10.6487	12.4446	12.4982	71.0734	70.1437	68.708	70.0448	2.35353	2.48997	2.82668	2.65539	6.68045	7.38278	7.58479	7.28899	33.717
55	-42.7551	-26.762	25.4309	-24.4115	12.0672	15.6048	17.8357	17.6585	17.623	21.1825	23.6788	23.4162	7.29851	10.6487	12.4446	12.4982	71.0734	70.1437	68.708	70.0448	2.35353	2.48997	2.82668	2.65539	6.68045	7.38278	7.58479	7.28899	33.474
56	-42.7551	-26.762	-74.5691	-24.4115	12.0672	15.6048	17.8357	17.6585	17.623	21.1825	23.6788	23.4162	7.29851	10.6487	12.6446	12.4982	71.0734	70.1437	68.708	70.0448	2.35353	2.48997	2.82668	2.65539	6.68045	7.38278	7.58479	7.28899	37.1548
57	-42.7551	-26.762	-64.5691	-24.4115	12.0672	15.6048	17.8357	17.6585	17.623	21.1825	23.6788	23.4162	7.29851	10.6487	12.6446	12.4982	71.0734	70.1437	68.708	70.0448	2.35353	2.48997	2.82668	2.65539	6.68045	7.38278	7.58479	7.28899	36.7049
58	-42.7551	-26.762	-54.5691	-24.4115	12.0672	15.6048	17.8357	17.6585	17.623	21.1825	23.6788	23.4162	7.29851	10.6487	12.6446	12.4982	71.0734	70.1437	68.708	70.0448	2.35353	2.48997	2.82668	2.65539	6.68045	7.38278	7.58479	7.28899	36.2736
59	-42.7551	-26.762	-44.5691	-24.4115	12.0672	15.6048	17.8357	17.6585	17.623	21.1825	23.6788	23.4162	7.29851	10.6487	12.6446	12.4982	71.0734	70.1437	68.708	70.0448	2.35353	2.48997	2.82668	2.65539	6.68045	7.38278	7.58479	7.28899	35.862
60	-42.7551	-26.762	-34.5691	-24.4115	12.0672	15.6048	17.8357	17.6585	17.623	21.1825	23.6788	23.4162	7.29851	10.6487	12.6446	12.4982	71.0734	70.1437	68.708	70.0448	2.35353	2.48997	2.82668	2.65539	6.68045	7.38278	7.58479	7.28899	35.4707
61	-42.7551	-26.762	-24.5691	-24.4115	12.0672	15.6048	17.8357	17.6585	17.623	21.1825	23.6788	23.4162	7.29851	10.6487	12.6446	12.4982	71.0734	70.1437	68.708	70.0448	2.35353	2.48997	2.82668	2.65539	6.68045	7.38278	7.58479	7.28899	35.1004
62	-42.7551	-26.762	-14.5691	-24.4115	12.0672	15.6048	17.8357	17.6585	17.623	21.1825	23.6788	23.4162	7.29851	10.6487	12.6446	12.4982	71.0734	70.1437	68.708	70.0448	2.35353	2.48997	2.82668	2.65539	6.68045	7.38278	7.58479	7.28899	34.7516
63	-42.7551	-26.762	-4.56909	-24.4115	12.0672	15.6048	17.8357	17.6585	17.623	21.1825	23.6788	23.4162	7.29851	10.6487	12.6446	12.4982	71.0734	70.1437	68.708	70.0448	2.35353	2.48997	2.82668	2.65539	6.68045	7.38278	7.58479	7.28899	34.4249
64	-42.7551	-26.762	5.43091	-24.4115	12.0672	15.6048	17.8357	17.6585	17.623	21.1825	23.6788	23.4162	7.29851	10.6487	12.6446	12.4982	71.0734	70.1437	68.708	70.0448	2.35353	2.48997	2.82668	2.65539	6.68045	7.38278	7.58479	7.28899	34.1204
65	-42.7551	-26.762	15.4309	-24.4115	12.0672	15.6048	17.8357	17.6585	17.623	21.1825	23.6788	23.4162	7.29851	10.6487	12.6446	12.4982	71.0734	70.1437	68.708	70.0448	2.35353	2.48997	2.82668	2.65539	6.68045	7.38278	7.58479	7.28899	33.8383
66	-42.7551	-26.762	25.4309	-24.4115	12.0672	15.6048	17.8357	17.6585	17.623	21.1825	23.6788	23.4162	7.29851	10.6487	12.6446	12.4982	71.0734	70.1437	68.708	70.0448	2.35353	2.48997	2.82668	2.65539	6.68045	7.38278	7.58479	7.28899	33.5786
67	-42.7551	-26.762	-74.5691	-24.4115	12.0672	15.6048	17.8357	17.6585	17.623	21.1825	23.6788	23.4162	7.29851	10.6487	12.8446	12.4982	71.0734	70.1437	68.708	70.0448	2.35353	2.48997	2.82668	2.65539	6.68045	7.38278	7.58479	7.28899	37.4015
68	-42.7551	-26.762	-64.5691	-24.4115	12.0672	15.6048	17.8357	17.6585	17.623	21.1825	23.6788	23.4162	7.29851	10.6487	12.8446	12.4982	71.0734	70.1437	68.708	70.0448	2.35353	2.48997	2.82668	2.65539	6.68045	7.38278	7.58479	7.28899	36.9406
69	-42.7551	-26.762	-54.5691	-24.4115	12.0672	15.6048	17.8357	17.6585	17.623	21.1825	23.6788	23.4162	7.29851	10.6487	12.8446	12.4982	71.0734	70.1437	68.708	70.0448	2.35353	2.48997	2.82668	2.65539	6.68045	7.38278	7.58479	7.28899	36.4976
70	-42.7551	-26.762	-44.5691	-24.4115	12.0672	15.6048	17.8357	17.6585	17.623	21.1825	23.6788	23.4162	7.29851	10.6487	12.8446	12.4982	71.0734	70.1437	68.708	70.0448	2.35353	2.48997	2.82668	2.65539	6.68045	7.38278	7.58479	7.28899	36.0732
71	-42.7551	-26.762	-34.5691	-24.4115	12.0672	15.6048	17.8357	17.6585	17.623	21.1825	23.6788	23.4162	7.29851	10.6487	12.8446	12.4982	71.0734	70.1437	68.708	70.0448	2.35353	2.48997	2.82668	2.65539	6.68045	7.38278	7.58479	7.28899	35.6684
72	-42.7551	-26.762	-24.5691	-24.4115	12.0672	15.6048	17.8357	17.6585	17.623	21.1825	23.6788	23.4162	7.29851	10.6487	12.8446	12.4982	71.0734	70.1437	68.708	70.0448	2.35353	2.48997	2.82668	2.65539	6.68045	7.38278	7.58479	7.28899	35.284
73	-42.7551	-26.762	-14.5691	-24.4115	12.0672	15.6048	17.8357	17.6585	17.623	21.1825	23.6788	23.4162	7.29851	10.6487	12.8446	12.4982	71.0734	70.1437	68.708	70.0448	2.35353	2.48997	2.82668	2.65539	6.68045	7.38278	7.58479	7.28899	34.9204
74	-42.7551	-26.762	-4.56909	-24.4115	12.0672	15.6048	17.8357	17.6585	17.623	21.1825	23.6788	23.4162	7.29851	10.6487	12.8446	12.4982	71.0734	70.1437	68.708	70.0448	2.35353	2.48997	2.82668	2.65539	6.68045	7.38278	7.58479	7.28899	34.5782
75	-42.7551	-26.762	5.43091	-24.4115	12.0672	15.6048	17.8357	17.6585	17.623	21.1825	23.6788	23.4162	7.29851	10.6487	12.8446	12.4982	71.0734	70.1437	68.708	70.0448	2.35353	2.48997	2.82668	2.65539	6.68045	7.38278	7.58479	7.28899	34.2579
76	-42.7551	-26.762	15.4309	-24.4115	12.0672	15.6048	17.8357	17.6585	17.623	21.1825	23.6788	23.4162	7.29851	10.6487	12.8446	12.4982	71.0734	70.1437	68.708	70.0448	2.35353	2.48997	2.82668	2.65539	6.68045	7.38278	7.58479	7.28899	33.9595
77	-42.7551	-26.762	25.4309	-24.4115	12.0672	15.6048	17.8357	17.6585	17.623	21.1825	23.6788	23.4162	7.29851	10.6487	12.8446	12.4982	71.0734	70.1437	68.708	70.0448	2.35353	2.48997	2.82668	2.65539	6.68045	7.38278	7.58479	7.28899	33.6833
78	-42.7551	-26.762	-74.5691	-24.4115	12.0672	15.6048	17.8357	17.6585	17.623	21.1825	23.6788	23.4162	7.29851	10.6487	13.0845	12.4982	71.0734	70.1437	68.708	70.0448	2.35353	2.48997	2.82668	2.65539	6.68045	7.38278	7.58479	7.28899	37.6925
79	-42.7551	-26.762	-64.5691	-24.4115	12.0672	15.6048	17.8357	17.6585	17.623	21.1825	23.6788	23.4162	7.29851	10.6487	13.0845	12.4982	71.0734	70.1437	68.708	70.0448	2.35353	2.48997	2.82668	2.65539	6.68045	7.38278	7.58479	7.28899	37.219
80	-42.7551	-26.762	-54.5691	-24.4115	12.0672	15.6048	17.8357	17.6585	17.623	21.1825	23.6788	23.4162	7.29851	10.6487	13.0845	12.4982	71.0734	70.1437	68.708	70.0448	2.35353	2.48997	2.82668	2.65539	6.68045	7.38278	7.58479	7.28899	36.7622
81	-42.7551	-26.762	-44.5691	-24.4115	12.0672	15.6048	17.8357	17.6585	17.623	21.1825	23.6788	23.4162	7.29851	10.6487	13.0845	12.4982	71.0734	70.1437	68.708	70.0448	2.35353	2.48997	2.82668	2.65539	6.68045	7.38278	7.58479	7.28899	36.3231
82	-42.7551	-26.762	-34.5691	-24.4115	12.0672	15.6048	17.8357	17.6585	17.623	21.1825	23.6788	23.4162	7.29851	10.6487	13.0845	12.4982	71.0734	70.1437	68.708	70.0448	2.35353	2.48997	2.82668	2.65539	6.68045	7.38278	7.58479	7.28899	35.9027
83	-42.7551	-26.762	-24.5691	-24.4115	12.0672	15.6048	17.8357	17.6585	17.623	21.1825	23.6788	23.4162	7.29851	10.6487	13.0845	12.4982	71.0734	70.1437	68.708	70.0448	2.35353	2.48997	2.82668	2.65539	6.68045	7.38278	7.58479	7.28899	35.5016
84	-42.7551	-26.762	-14.5691	-24.4115	12.0672	15.6048	17.8357	17.6585	17.623	21.1825	23.6788	23.4162	7.29851	10.6487	13.0845	12.4982	71.0734	70.1437	68.708	70.0448	2.35353	2.48997	2.82668	2.65539	6.68045	7.38278	7.58479	7.28899	35.1207
85	-42.7551	-26.762	-4.56909	-24.4115	12.0672	15.6048	17.8357	17.6585	17.623	21.1825	23.6788	23.4162	7.29851	10.6487	13.0845	12.4982	71.0734	70.1437	68.708	70.0448	2.35353	2.48997	2.82668	2.65539	6.68045	7.38278	7.58479	7.28899	34.7605
86	-42.7551	-26.762	5.43091	-24.4115	12.0672	15.6048	17.8357	17.6585	17.623	21.1825	23.6788	23.4162	7.29851	10.6487	13.0845	12.4982	71.0734	70.1437	68.708	70.0448	2.35353	2.48997	2.82668	2.65539	6.68045	7.38278	7.58479	7.28899	34.4216
87	-42.7551	-26.762	15.4309	-24.4115	12.0672	15.6048	17.8357	17.6585	17.623	21.1825	23.6788	23.4162	7.29851	10.6487	13.0845	12.4982	71.0734	70.1437	68.708	70.0448	2.35353	2.48997	2.82668	2.65539	6.68045	7.38278	7.58479	7.28899	34.1041
88	-42.7551	-26.762	25.4309	-24.4115	12.0672	15.6048	17.8357	17.6585	17.623	21.1825	23.6788	23.4162	7.29851	10.6487	13.0845	12.4982	71.0734	70.1437	68.708	70.0448	2.35353	2.48997	2.82668	2.65539	6.68045	7.38278	7.58479	7.28899	33.8084
89	-42.7551	-26.762	-74.5691	-24.4115	12.0672	15.6048	17.8357	17.6585	17.623	21.1825	23.6788	23.4162	7.29851	10.6487	13.2446	12.4982	71.0734	70.1437	68.708	70.0448	2.35353	2.48997	2.82668	2.65539	6.68045	7.38278	7.58479	7.28899	37.886
90	-42.7551	-26.762	-64.5691	-24.4115	12.0672	15.6048	17.8357	17.6585	17.623	21.1825	23.6788	23.4162	7.29851	10.6487	13.2446	12.4982	71.0734	70.1437	68.708	70.0448	2.35353	2.48997	2.82668	2.65539	6.68045	7.38278	7.58479	7.28899	37.4042
91	-42.7551	-26.762	-54.5691	-24.4115	12.0672	15.6048	17.8357	17.6585	17.623	21.1825	23.6788	23.4162	7.29851	10.6487	13.2446	12.4982	71.0734	70.1437	68.708	70.0448	2.35353	2.48997	2.82668	2.65539	6.68045	7.38278	7.58479	7.28899	36.9385
92	-42.7551	-26.762	-44.5691	-24.4115	12.0672	15.6048	17.8357	17.6585	17.623	21.1825	23.6788	23.4162	7.29851	10.6487	13.2446	12.4982	71.0734	70.1437	68.708	70.0448	2.35353	2.48997	2.82668	2.65539	6.68045	7.38278	7.58479	7.28899	36.4898
93	-42.7551	-26.762	-34.5691	-24.4115	12.0672	15.6048	17.8357	17.6585	17.623	21.1825	23.6788	23.4162	7.29851	10.6487	13.2446	12.4982	71.0734	70.1437	68.708	70.0448	2.35353	2.48997	2.82668	2.65539	6.68045	7.38278	7.58479	7.28899	36.0591
94	-42.7551	-26.762	-24.5691	-24.4115	12.0672	15.6048	17.8357	17.6585	17.623	21.1825	23.6788	23.4162	7.29851	10.6487	13.2446	12.4982	71.0734	70.1437	68.708	70.0448	2.35353	2.48997	2.82668	2.65539	6.68045	7.38278	7.58479	7.28899	35.6471
95	-42.7551	-26.762	-14.5691	-24.4115	12.0672	15.6048	17.8357	17.6585	17.623	21.1825	23.6788	23.4162	7.29851	10.6487	13.2446	12.4982	71.0734	70.1437	68.708	70.0448	2.35353	2.48997	2.82668	2.65539	6.68045	7.38278	7.58479	7.28899	35.2548
96	-42.7551	-26.762	-4.56909	-24.4115	12.0672	15.6048	17.8357	17.6585	17.623	21.1825	23.6788	23.4162	7.29851	10.6487	13.2446	12.4982	71.0734	70.1437	68.708	70.0448	2.35353	2.48997	2.82668	2.65539	6.68045	7.38278	7.58479	7.28899	34.8827
97	-42.7551	-26.762	5.43091	-24.4115	12.0672	15.6048	17.8357	17.6585	17.623	21.1825	23.6788	23.4162	7.29851	10.6487	13.2446	12.4982	71.0734	70.1437	68.708	70.0448	2.35353	2.48997	2.82668	2.65539	6.68045	7.38278	7.58479	7.28899	34.5314
98	-42.7551	-26.762	15.4309	-24.4115	12.0672	15.6048	17.8357	17.6585	17.623	21.1825	23.6788	23.4162	7.29851	10.6487	13.2446	12.4982	71.0734	70.1437	68.708	70.0448	2.35353	2.48997	2.82668	2.65539	6.68045	7.38278	7.58479	7.28899	34.2013
99	-42.7551	-26.762	25.4309	-24.4115	12.0672	15.6048	17.8357	17.6585	17.623	21.1825	23.6788	23.4162	7.29851	10.6487	13.2446	12.4982	71.0734	70.1437	68.708	70.0448	2.35353	2.48997	2.82668	2.65539	6.68045	7.38278	7.58479	7.28899	33.8927
100	-42.7551	-26.762	-74.5691	-24.4115	12.0672	15.6048	17.8357	17.6585	17.623	21.1825	23.6788	23.4162	7.29851	10.6487	13.4446	12.4982	71.0734	70.1437	68.708	70.0448	2.35353	2.48997	2.82668	2.65539	6.68045	7.38278	7.58479	7.28899	38.1234
101	-42.7551	-26.762	-64.5691	-24.4115	12.0672	15.6048	17.8357	17.6585	17.623	21.1825	23.6788	23.4162	7.29851	10.6487	13.4446	12.4982	71.0734	70.1437	68.708	70.0448	2.35353	2.48997	2.82668	2.65539	6.68045	7.38278	7.58479	7.28899	37.6317
102	-42.7551	-26.762	-54.5691	-24.4115	12.0672	15.6048	17.8357	17.6585	17.623	21.1825	23.6788	23.4162	7.29851	10.6487	13.4446	12.4982	71.0734	70.1437	68.708	70.0448	2.35353	2.48997	2.82668	2.65539	6.68045	7.38278	7.58479	7.28899	37.1552
103	-42.7551	-26.762	-44.5691	-24.4115	12.0672	15.6048	17.8357	17.6585	17.623	21.1825	23.6788	23.4162	7.29851	10.6487	13.4446	12.4982	71.0734	70.1437	68.708	70.0448	2.35353	2.48997	2.82668	2.65539	6.68045	7.38278	7.58479	7.28899	36.6948
104	-42.7551	-26.762	-34.5691	-24.4115	12.0672	15.6048	17.8357	17.6585	17.623	21.1825	23.6788	23.4162	7.29851	10.6487	13.4446	12.4982	71.0734	70.1437	68.708	70.0448	2.35353	2.48997	2.82668	2.65539	6.68045	7.38278	7.58479	7.28899	36.2516
105	-42.7551	-26.762	-24.5691	-24.4115	12.0672	15.6048	17.8357	17.6585	17.623	21.1825	23.6788	23.4162	7.29851	10.6487	13.4446	12.4982	71.0734	70.1437	68.708	70.0448	2.35353	2.48997	2.82668	2.65539	6.68045	7.38278	7.58479	7.28899	35.8265
106	-42.7551	-26.762	-14.5691	-24.4115	12.0672	15.6048	17.8357	17.6585	17.623	21.1825	23.6788	23.4162	7.29851	10.6487	13.4446	12.4982	71.0734	70.1437	68.708	70.0448	2.35353	2.48997	2.82668	2.65539	6.68045	7.38278	7.58479	7.28899	35.4203
107	-42.7551	-26.762	-4.56909	-24.4115	12.0672	15.6048	17.8357	17.6585	17.623	21.1825	23.6788	23.4162	7.29851	10.6487	13.4446	12.4982	71.0734	70.1437	68.708	70.0448	2.35353	2.48997	2.82668	2.65539	6.68045	7.38278	7.58479	7.28899	35.0337
108	-42.7551	-26.762	5.43091	-24.4115	12.0672	15.6048	17.8357	17.6585	17.623	21.1825	23.6788	23.4162	7.29851	10.6487	13.4446	12.4982	71.0734	70.1437	68.708	70.0448	2.35353	2.48997	2.82668	2.65539	6.68045	7.38278	7.58479	7.28899	34.6674
109	-42.7551	-26.762	15.4309	-24.4115	12.0672	15.6048	17.8357	17.6585	17.623	21.1825	23.6788	23.4162	7.29851	10.6487	13.4446	12.4982	71.0734	70.1437	68.708	70.0448	2.35353	2.48997	2.82668	2.65539	6.68045	7.38278	7.58479	7.28899	34.3218
110	-42.7551	-26.762	25.4309	-24.4115	12.0672	15.6048	17.8357	17.6585	17.623	21.1825	23.6788	23.4162	7.29851	10.6487	13.4446	12.4982	71.0734	70.1437	68.708	70.0448	2.35353	2.48997	2.82668	2.65539	6.68045	7.38278	7.58479	7.28899	33.9974
111	-42.7551	-26.762	-74.5691	-24.4115	12.0672	15.6048	17.8357	17.6585	17.623	21.1825	23.6788	23.4162	7.29851	10.6487	13.6446	12.4982	71.0734	70.1437	68.708	70.0448	2.35353	2.48997	2.82668	2.65539	6.68045	7.38278	7.58479	7.28899	38.3573
112	-42.7551	-26.762	-64.5691	-24.4115	12.0672	15.6048	17.8357	17.6585	17.623	21.1825	23.6788	23.4162	7.29851	10.6487	13.6446	12.4982	71.0734	70.1437	68.708	70.0448	2.35353	2.48997	2.82668	2.65539	6.68045	7.38278	7.58479	7.28899	37.8561
113	-42.7551	-26.762	-54.5691	-24.4115	12.0672	15.6048	17.8357	17.6585	17.623	21.1825	23.6788	23.4162	7.29851	10.6487	13.6446	12.4982	71.0734	70.1437	68.708	70.0448	2.35353	2.48997	2.82668	2.65539	6.68045	7.38278	7.58479	7.28899	37.3691
114	-42.7551	-26.762	-44.5691	-24.4115	12.0672	15.6048	17.8357	17.6585	17.623	21.1825	23.6788	23.4162	7.29851	10.6487	13.6446	12.4982	71.0734	70.1437	68.708	70.0448	2.35353	2.48997	2.82668	2.65539	6.68045	7.38278	7.58479	7.28899	36.8974
115	-42.7551	-26.762	-34.5691	-24.4115	12.0672	15.6048	17.8357	17.6585	17.623	21.1825	23.6788	23.4162	7.29851	10.6487	13.6446	12.4982	71.0734	70.1437	68.708	70.0448	2.35353	2.48997	2.82668	2.65539	6.68045	7.38278	7.58479	7.28899	36.4421
116	-42.7551	-26.762	-24.5691	-24.4115	12.0672	15.6048	17.8357	17.6585	17.623	21.1825	23.6788	23.4162	7.29851	10.6487	13.6446	12.4982	71.0734	70.1437	68.708	70.0448	2.35353	2.48997	2.82668	2.65539	6.68045	7.38278	7.58479	7.28899	36.0041
117	-42.7551	-26.762	-14.5691	-24.4115	12.0672	15.6048	17.8357	17.6585	17.623	21.1825	23.6788	23.4162	7.29851	10.6487	13.6446	12.4982	71.0734	70.1437	68.708	70.0448	2.35353	2.48997	2.82668	2.65539	6.68045	7.38278	7.58479	7.28899	35.5844
118	-42.7551	-26.762	-4.56909	-24.4115	12.0672	15.6048	17.8357	17.6585	17.623	21.1825	23.6788	23.4162	7.29851	10.6487	13.6446	12.4982	71.0734	70.1437	68.708	70.0448	2.35353	2.48997	2.82668	2.65539	6.68045	7.38278	7.58479	7.28899	35.1836
119	-42.7551	-26.762	5.43091	-24.4115	12.0672	15.6048	17.8357	17.6585	17.623	21.1825	23.6788	23.4162	7.29851	10.6487	13.6446	12.4982	71.0734	70.1437	68.708	70.0448	2.35353	2.48997	2.82668	2.65539	6.68045	7.38278	7.58479	7.28899	34.8026
120	-42.7551	-26.762	15.4309	-24.4115	12.0672	15.6048	17.8357	17.6585	17.623	21.1825	23.6788	23.4162	7.29851	10.6487	13.6446	12.4982	71.0734	70.1437	68.708	70.0448	2.35353	2.48997	2.82668	2.65539	6.68045	7.38278	7.58479	7.28899	34.4419
121	-42.7551	-26.762	25.4309	-24.4115	12.0672	15.6048	17.8357	17.6585	17.623	21.1825	23.6788	23.4162	7.29851	10.6487	13.6446	12.4982	71.0734	70.1437	68.708	70.0448	2.35353	2.48997	2.82668	2.65539	6.68045	7.38278	7.58479	7.28899	34.102
122	-92.7551	-26.762	-24.5691	-24.4115	12.0672	15.6048	17.8357	17.6585	16.623	21.1825	23.6788	23.4162	7.29851	10.6487	12.6446	12.4982	71.0734	70.1437	68.708	70.0448	2.35353	2.48997	2.82668	2.65539	6.68045	7.38278	7.58479	7.28899	33.174
123	-82.7551	-26.762	-24.5691	-24.4115	12.0672	15.6048	17.8357	17.6585	16.623	21.1825	23.6788	23.4162	7.29851	10.6487	12.6446	12.4982	71.0734	70.1437	68.708	70.0448	2.35353	2.48997	2.82668	2.65539	6.68045	7.38278	7.58479	7.28899	33.7067
124	-72.7551	-26.762	-24.5691	-24.4115	12.0672	15.6048	17.8357	17.6585	16.623	21.1825	23.6788	23.4162	7.29851	10.6487	12.6446	12.4982	71.0734	70.1437	68.708	70.0448	2.35353	2.48997	2.82668	2.65539	6.68045	7.38278	7.58479	7.28899	34.2345
125	-62.7551	-26.762	-24.5691	-24.4115	12.0672	15.6048	17.8357	17.6585	16.623	21.1825	23.6788	23.4162	7.29851	10.6487	12.6446	12.4982	71.0734	70.1437	68.708	70.0448	2.35353	2.48997	2.82668	2.65539	6.68045	7.38278	7.58479	7.28899	34.7576
126	-52.7551	-26.762	-24.5691	-24.4115	12.0672	15.6048	17.8357	17.6585	16.623	21.1825	23.6788	23.4162	7.29851	10.6487	12.6446	12.4982	71.0734	70.1437	68.708	70.0448	2.35353	2.48997	2.82668	2.65539	6.68045	7.38278	7.58479	7.28899	35.2765
127	-42.7551	-26.762	-24.5691	-24.4115	12.0672	15.6048	17.8357	17.6585	16.623	21.1825	23.6788	23.4162	7.29851	10.6487	12.6446	12.4982	71.0734	70.1437	68.708	70.0448	2.35353	2.48997	2.82668	2.65539	6.68045	7.38278	7.58479	7.28899	35.7914
128	-32.7551	-26.762	-24.5691	-24.4115	12.0672	15.6048	17.8357	17.6585	16.623	21.1825	23.6788	23.4162	7.29851	10.6487	12.6446	12.4982	71.0734	70.1437	68.708	70.0448	2.35353	2.48997	2.82668	2.65539	6.68045	7.38278	7.58479	7.28899	36.3026
129	-22.7551	-26.762	-24.5691	-24.4115	12.0672	15.6048	17.8357	17.6585	16.623	21.1825	23.6788	23.4162	7.29851	10.6487	12.6446	12.4982	71.0734	70.1437	68.708	70.0448	2.35353	2.48997	2.82668	2.65539	6.68045	7.38278	7.58479	7.28899	36.8105
130	-12.7551	-26.762	-24.5691	-24.4115	12.0672	15.6048	17.8357	17.6585	16.623	21.1825	23.6788	23.4162	7.29851	10.6487	12.6446	12.4982	71.0734	70.1437	68.708	70.0448	2.35353	2.48997	2.82668	2.65539	6.68045	7.38278	7.58479	7.28899	37.3153
131	-2.7551	-26.762	-24.5691	-24.4115	12.0672	15.6048	17.8357	17.6585	16.623	21.1825	23.6788	23.4162	7.29851	10.6487	12.6446	12.4982	71.0734	70.1437	68.708	70.0448	2.35353	2.48997	2.82668	2.65539	6.68045	7.38278	7.58479	7.28899	37.8173
132	7.2449	-26.762	-24.5691	-24.4115	12.0672	15.6048	17.8357	17.6585	16.623	21.1825	23.6788	23.4162	7.29851	10.6487	12.6446	12.4982	71.0734	70.1437	68.708	70.0448	2.35353	2.48997	2.82668	2.65539	6.68045	7.38278	7.58479	7.28899	38.3168
133	-92.7551	-26.762	-24.5691	-24.4115	12.0672	15.6048	17.8357	17.6585	16.823	21.1825	23.6788	23.4162	7.29851	10.6487	12.6446	12.4982	71.0734	70.1437	68.708	70.0448	2.35353	2.48997	2.82668	2.65539	6.68045	7.38278	7.58479	7.28899	33.04
134	-82.7551	-26.762	-24.5691	-24.4115	12.0672	15.6048	17.8357	17.6585	16.823	21.1825	23.6788	23.4162	7.29851	10.6487	12.6446	12.4982	71.0734	70.1437	68.708	70.0448	2.35353	2.48997	2.82668	2.65539	6.68045	7.38278	7.58479	7.28899	33.5715
135	-72.7551	-26.762	-24.5691	-24.4115	12.0672	15.6048	17.8357	17.6585	16.823	21.1825	23.6788	23.4162	7.29851	10.6487	12.6446	12.4982	71.0734	70.1437	68.708	70.0448	2.35353	2.48997	2.82668	2.65539	6.68045	7.38278	7.58479	7.28899	34.0982
136	-62.7551	-26.762	-24.5691	-24.4115	12.0672	15.6048	17.8357	17.6585	16.823	21.1825	23.6788	23.4162	7.29851	10.6487	12.6446	12.4982	71.0734	70.1437	68.708	70.0448	2.35353	2.48997	2.82668	2.65539	6.68045	7.38278	7.58479	7.28899	34.6203
137	-52.7551	-26.762	-24.5691	-24.4115	12.0672	15.6048	17.8357	17.6585	16.823	21.1825	23.6788	23.4162	7.29851	10.6487	12.6446	12.4982	71.0734	70.1437	68.708	70.0448	2.35353	2.48997	2.82668	2.65539	6.68045	7.38278	7.58479	7.28899	35.1382
138	-42.7551	-26.762	-24.5691	-24.4115	12.0672	15.6048	17.8357	17.6585	16.823	21.1825	23.6788	23.4162	7.29851	10.6487	12.6446	12.4982	71.0734	70.1437	68.708	70.0448	2.35353	2.48997	2.82668	2.65539	6.68045	7.38278	7.58479	7.28899	35.6521
139	-32.7551	-26.762	-24.5691	-24.4115	12.0672	15.6048	17.8357	17.6585	16.823	21.1825	23.6788	23.4162	7.29851	10.6487	12.6446	12.4982	71.0734	70.1437	68.708	70.0448	2.35353	2.48997	2.82668	2.65539	6.68045	7.38278	7.58479	7.28899	36.1624
140	-22.7551	-26.762	-24.5691	-24.4115	12.0672	15.6048	17.8357	17.6585	16.823	21.1825	23.6788	23.4162	7.29851	10.6487	12.6446	12.4982	71.0734	70.1437	68.708	70.0448	2.35353	2.48997	2.82668	2.65539	6.68045	7.38278	7.58479	7.28899	36.6693
141	-12.7551	-26.762	-24.5691	-24.4115	12.0672	15.6048	17.8357	17.6585	16.823	21.1825	23.6788	23.4162	7.29851	10.6487	12.6446	12.4982	71.0734	70.1437	68.708	70.0448	2.35353	2.48997	2.82668	2.65539	6.68045	7.38278	7.58479	7.28899	37.1733
142	-2.7551	-26.762	-24.5691	-24.4115	12.0672	15.6048	17.8357	17.6585	16.823	21.1825	23.6788	23.4162	7.29851	10.6487	12.6446	12.4982	71.0734	70.1437	68.708	70.0448	2.35353	2.48997	2.82668	2.65539	6.68045	7.38278	7.58479	7.28899	37.6745
143	7.2449	-26.762	-24.5691	-24.4115	12.0672	15.6048	17.8357	17.6585	16.823	21.1825	23.6788	23.4162	7.29851	10.6487	12.6446	12.4982	71.0734	70.1437	68.708	70.0448	2.35353	2.48997	2.82668	2.65539	6.68045	7.38278	7.58479	7.28899	38.1733
144	-92.7551	-26.762	-24.5691	-24.4115	12.0672	15.6048	17.8357	17.6585	17.023	21.1825	23.6788	23.4162	7.29851	10.6487	12.6446	12.4982	71.0734	70.1437	68.708	70.0448	2.35353	2.48997	2.82668	2.65539	6.68045	7.38278	7.58479	7.28899	32.9064
145	-82.7551	-26.762	-24.5691	-24.4115	12.0672	15.6048	17.8357	17.6585	17.023	21.1825	23.6788	23.4162	7.29851	10.6487	12.6446	12.4982	71.0734	70.1437	68.708	70.0448	2.35353	2.48997	2.82668	2.65539	6.68045	7.38278	7.58479	7.28899	33.4369
146	-72.7551	-26.762	-24.5691	-24.4115	12.0672	15.6048	17.8357	17.6585	17.023	21.1825	23.6788	23.4162	7.29851	10.6487	12.6446	12.4982	71.0734	70.1437	68.708	70.0448	2.35353	2.48997	2.82668	2.65539	6.68045	7.38278	7.58479	7.28899	33.9625
147	-62.7551	-26.762	-24.5691	-24.4115	12.0672	15.6048	17.8357	17.6585	17.023	21.1825	23.6788	23.4162	7.29851	10.6487	12.6446	12.4982	71.0734	70.1437	68.708	70.0448	2.35353	2.48997	2.82668	2.65539	6.68045	7.38278	7.58479	7.28899	34.4835
148	-52.7551	-26.762	-24.5691	-24.4115	12.0672	15.6048	17.8357	17.6585	17.023	21.1825	23.6788	23.4162	7.29851	10.6487	12.6446	12.4982	71.0734	70.1437	68.708	70.0448	2.35353	2.48997	2.82668	2.65539	6.68045	7.38278	7.58479	7.28899	35.0004
149	-42.7551	-26.762	-24.5691	-24.4115	12.0672	15.6048	17.8357	17.6585	17.023	21.1825	23.6788	23.4162	7.29851	10.6487	12.6446	12.4982	71.0734	70.1437	68.708	70.0448	2.35353	2.48997	2.82668	2.65539	6.68045	7.38278	7.58479	7.28899	35.5133
150	-32.7551	-26.762	-24.5691	-24.4115	12.0672	15.6048	17.8357	17.6585	17.023	21.1825	23.6788	23.4162	7.29851	10.6487	12.6446	12.4982	71.0734	70.1437	68.708	70.0448	2.35353	2.48997	2.82668	2.65539	6.68045	7.38278	7.58479	7.28899	36.0227
151	-22.7551	-26.762	-24.5691	-24.4115	12.0672	15.6048	17.8357	17.6585	17.023	21.1825	23.6788	23.4162	7.29851	10.6487	12.6446	12.4982	71.0734	70.1437	68.708	70.0448	2.35353	2.48997	2.82668	2.65539	6.68045	7.38278	7.58479	7.28899	36.5287
152	-12.7551	-26.762	-24.5691	-24.4115	12.0672	15.6048	17.8357	17.6585	17.023	21.1825	23.6788	23.4162	7.29851	10.6487	12.6446	12.4982	71.0734	70.1437	68.708	70.0448	2.35353	2.48997	2.82668	2.65539	6.68045	7.38278	7.58479	7.28899	37.0319
153	-2.7551	-26.762	-24.5691	-24.4115	12.0672	15.6048	17.8357	17.6585	17.023	21.1825	23.6788	23.4162	7.29851	10.6487	12.6446	12.4982	71.0734	70.1437	68.708	70.0448	2.35353	2.48997	2.82668	2.65539	6.68045	7.38278	7.58479	7.28899	37.5323
154	7.2449	-26.762	-24.5691	-24.4115	12.0672	15.6048	17.8357	17.6585	17.023	21.1825	23.6788	23.4162	7.29851	10.6487	12.6446	12.4982	71.0734	70.1437	68.708	70.0448	2.35353	2.48997	2.82668	2.65539	6.68045	7.38278	7.58479	7.28899	38.0303
155	-92.7551	-26.762	-24.5691	-24.4115	12.0672	15.6048	17.8357	17.6585	17.223	21.1825	23.6788	23.4162	7.29851	10.6487	12.6446	12.4982	71.0734	70.1437	68.708	70.0448	2.35353	2.48997	2.82668	2.65539	6.68045	7.38278	7.58479	7.28899	32.7732
156	-82.7551	-26.762	-24.5691	-24.4115	12.0672	15.6048	17.8357	17.6585	17.223	21.1825	23.6788	23.4162	7.29851	10.6487	12.6446	12.4982	71.0734	70.1437	68.708	70.0448	2.35353	2.48997	2.82668	2.65539	6.68045	7.38278	7.58479	7.28899	33.3027
157	-72.7551	-26.762	-24.5691	-24.4115	12.0672	15.6048	17.8357	17.6585	17.223	21.1825	23.6788	23.4162	7.29851	10.6487	12.6446	12.4982	71.0734	70.1437	68.708	70.0448	2.35353	2.48997	2.82668	2.65539	6.68045	7.38278	7.58479	7.28899	33.8272
158	-62.7551	-26.762	-24.5691	-24.4115	12.0672	15.6048	17.8357	17.6585	17.223	21.1825	23.6788	23.4162	7.29851	10.6487	12.6446	12.4982	71.0734	70.1437	68.708	70.0448	2.35353	2.48997	2.82668	2.65539	6.68045	7.38278	7.58479	7.28899	34.3473
159	-52.7551	-26.762	-24.5691	-24.4115	12.0672	15.6048	17.8357	17.6585	17.223	21.1825	23.6788	23.4162	7.29851	10.6487	12.6446	12.4982	71.0734	70.1437	68.708	70.0448	2.35353	2.48997	2.82668	2.65539	6.68045	7.38278	7.58479	7.28899	34.8631
160	-42.7551	-26.762	-24.5691	-24.4115	12.0672	15.6048	17.8357	17.6585	17.223	21.1825	23.6788	23.4162	7.29851	10.6487	12.6446	12.4982	71.0734	70.1437	68.708	70.0448	2.35353	2.48997	2.82668	2.65539	6.68045	7.38278	7.58479	7.28899	35.3751
161	-32.7551	-26.762	-24.5691	-24.4115	12.0672	15.6048	17.8357	17.6585	17.223	21.1825	23.6788	23.4162	7.29851	10.6487	12.6446	12.4982	71.0734	70.1437	68.708	70.0448	2.35353	2.48997	2.82668	2.65539	6.68045	7.38278	7.58479	7.28899	35.8835
162	-22.7551	-26.762	-24.5691	-24.4115	12.0672	15.6048	17.8357	17.6585	17.223	21.1825	23.6788	23.4162	7.29851	10.6487	12.6446	12.4982	71.0734	70.1437	68.708	70.0448	2.35353	2.48997	2.82668	2.65539	6.68045	7.38278	7.58479	7.28899	36.3887
163	-12.7551	-26.762	-24.5691	-24.4115	12.0672	15.6048	17.8357	17.6585	17.223	21.1825	23.6788	23.4162	7.29851	10.6487	12.6446	12.4982	71.0734	70.1437	68.708	70.0448	2.35353	2.48997	2.82668	2.65539	6.68045	7.38278	7.58479	7.28899	36.891
164	-2.7551	-26.762	-24.5691	-24.4115	12.0672	15.6048	17.8357	17.6585	17.223	21.1825	23.6788	23.4162	7.29851	10.6487	12.6446	12.4982	71.0734	70.1437	68.708	70.0448	2.35353	2.48997	2.82668	2.65539	6.68045	7.38278	7.58479	7.28899	37.3907
165	7.2449	-26.762	-24.5691	-24.4115	12.0672	15.6048	17.8357	17.6585	17.223	21.1825	23.6788	23.4162	7.29851	10.6487	12.6446	12.4982	71.0734	70.1437	68.708	70.0448	2.35353	2.48997	2.82668	2.65539	6.68045	7.38278	7.58479	7.28899	37.888
166	-92.7551	-26.762	-24.5691	-24.4115	12.0672	15.6048	17.8357	17.6585	17.423	21.1825	23.6788	23.4162	7.29851	10.6487	12.6446	12.4982	71.0734	70.1437	68.708	70.0448	2.35353	2.48997	2.82668	2.65539	6.68045	7.38278	7.58479	7.28899	32.6406
167	-82.7551	-26.762	-24.5691	-24.4115	12.0672	15.6048	17.8357	17.6585	17.423	21.1825	23.6788	23.4162	7.29851	10.6487	12.6446	12.4982	71.0734	70.1437	68.708	70.0448	2.35353	2.48997	2.82668	2.65539	6.68045	7.38278	7.58479	7.28899	33.169
168	-72.7551	-26.762	-24.5691	-24.4115	12.0672	15.6048	17.8357	17.6585	17.423	21.1825	23.6788	23.4162	7.29851	10.6487	12.6446	12.4982	71.0734	70.1437	68.708	70.0448	2.35353	2.48997	2.82668	2.65539	6.68045	7.38278	7.58479	7.28899	33.6925
169	-62.7551	-26.762	-24.5691	-24.4115	12.0672	15.6048	17.8357	17.6585	17.423	21.1825	23.6788	23.4162	7.29851	10.6487	12.6446	12.4982	71.0734	70.1437	68.708	70.0448	2.35353	2.48997	2.82668	2.65539	6.68045	7.38278	7.58479	7.28899	34.2116
170	-52.7551	-26.762	-24.5691	-24.4115	12.0672	15.6048	17.8357	17.6585	17.423	21.1825	23.6788	23.4162	7.29851	10.6487	12.6446	12.4982	71.0734	70.1437	68.708	70.0448	2.35353	2.48997	2.82668	2.65539	6.68045	7.38278	7.58479	7.28899	34.7264
171	-42.7551	-26.762	-24.5691	-24.4115	12.0672	15.6048	17.8357	17.6585	17.423	21.1825	23.6788	23.4162	7.29851	10.6487	12.6446	12.4982	71.0734	70.1437	68.708	70.0448	2.35353	2.48997	2.82668	2.65539	6.68045	7.38278	7.58479	7.28899	35.2375
172	-32.7551	-26.762	-24.5691	-24.4115	12.0672	15.6048	17.8357	17.6585	17.423	21.1825	23.6788	23.4162	7.29851	10.6487	12.6446	12.4982	71.0734	70.1437	68.708	70.0448	2.35353	2.48997	2.82668	2.65539	6.68045	7.38278	7.58479	7.28899	35.745
173	-22.7551	-26.762	-24.5691	-24.4115	12.0672	15.6048	17.8357	17.6585	17.423	21.1825	23.6788	23.4162	7.29851	10.6487	12.6446	12.4982	71.0734	70.1437	68.708	70.0448	2.35353	2.48997	2.82668	2.65539	6.68045	7.38278	7.58479	7.28899	36.2493
174	-12.7551	-26.762	-24.5691	-24.4115	12.0672	15.6048	17.8357	17.6585	17.423	21.1825	23.6788	23.4162	7.29851	10.6487	12.6446	12.4982	71.0734	70.1437	68.708	70.0448	2.35353	2.48997	2.82668	2.65539	6.68045	7.38278	7.58479	7.28899	36.7508
175	-2.7551	-26.762	-24.5691	-24.4115	12.0672	15.6048	17.8357	17.6585	17.423	21.1825	23.6788	23.4162	7.29851	10.6487	12.6446	12.4982	71.0734	70.1437	68.708	70.0448	2.35353	2.48997	2.82668	2.65539	6.68045	7.38278	7.58479	7.28899	37.2496
176	7.2449	-26.762	-24.5691	-24.4115	12.0672	15.6048	17.8357	17.6585	17.423	21.1825	23.6788	23.4162	7.29851	10.6487	12.6446	12.4982	71.0734	70.1437	68.708	70.0448	2.35353	2.48997	2.82668	2.65539	6.68045	7.38278	7.58479	7.28899	37.7462
177	-92.7551	-26.762	-24.5691	-24.4115	12.0672	15.6048	17.8357	17.6585	17.623	21.1825	23.6788	23.4162	7.29851	10.6487	12.6446	12.4982	71.0734	70.1437	68.708	70.0448	2.35353	2.48997	2.82668	2.65539	6.68045	7.38278	7.58479	7.28899	32.5083
178	-82.7551	-26.762	-24.5691	-24.4115	12.0672	15.6048	17.8357	17.6585	17.623	21.1825	23.6788	23.4162	7.29851	10.6487	12.6446	12.4982	71.0734	70.1437	68.708	70.0448	2.35353	2.48997	2.82668	2.65539	6.68045	7.38278	7.58479	7.28899	33.0357
179	-72.7551	-26.762	-24.5691	-24.4115	12.0672	15.6048	17.8357	17.6585	17.623	21.1825	23.6788	23.4162	7.29851	10.6487	12.6446	12.4982	71.0734	70.1437	68.708	70.0448	2.35353	2.48997	2.82668	2.65539	6.68045	7.38278	7.58479	7.28899	33.5583
180	-62.7551	-26.762	-24.5691	-24.4115	12.0672	15.6048	17.8357	17.6585	17.623	21.1825	23.6788	23.4162	7.29851	10.6487	12.6446	12.4982	71.0734	70.1437	68.708	70.0448	2.35353	2.48997	2.82668	2.65539	6.68045	7.38278	7.58479	7.28899	34.0764
181	-52.7551	-26.762	-24.5691	-24.4115	12.0672	15.6048	17.8357	17.6585	17.623	21.1825	23.6788	23.4162	7.29851	10.6487	12.6446	12.4982	71.0734	70.1437	68.708	70.0448	2.35353	2.48997	2.82668	2.65539	6.68045	7.38278	7.58479	7.28899	34.5903
182	-42.7551	-26.762	-24.5691	-24.4115	12.0672	15.6048	17.8357	17.6585	17.623	21.1825	23.6788	23.4162	7.29851	10.6487	12.6446	12.4982	71.0734	70.1437	68.708	70.0448	2.35353	2.48997	2.82668	2.65539	6.68045	7.38278	7.58479	7.28899	35.1004
183	-32.7551	-26.762	-24.5691	-24.4115	12.0672	15.6048	17.8357	17.6585	17.623	21.1825	23.6788	23.4162	7.29851	10.6487	12.6446	12.4982	71.0734	70.1437	68.708	70.0448	2.35353	2.48997	2.82668	2.65539	6.68045	7.38278	7.58479	7.28899	35.607
184	-22.7551	-26.762	-24.5691	-24.4115	12.0672	15.6048	17.8357	17.6585	17.623	21.1825	23.6788	23.4162	7.29851	10.6487	12.6446	12.4982	71.0734	70.1437	68.708	70.0448	2.35353	2.48997	2.82668	2.65539	6.68045	7.38278	7.58479	7.28899	36.1104
185	-12.7551	-26.762	-24.5691	-24.4115	12.0672	15.6048	17.8357	17.6585	17.623	21.1825	23.6788	23.4162	7.29851	10.6487	12.6446	12.4982	71.0734	70.1437	68.708	70.0448	2.35353	2.48997	2.82668	2.65539	6.68045	7.38278	7.58479	7.28899	36.6111
186	-2.7551	-26.762	-24.5691	-24.4115	12.0672	15.6048	17.8357	17.6585	17.623	21.1825	23.6788	23.4162	7.29851	10.6487	12.6446	12.4982	71.0734	70.1437	68.708	70.0448	2.35353	2.48997	2.82668	2.65539	6.68045	7.38278	7.58479	7.28899	37.1092
187	7.2449	-26.762	-24.5691	-24.4115	12.0672	15.6048	17.8357	17.6585	17.623	21.1825	23.6788	23.4162	7.29851	10.6487	12.6446	12.4982	71.0734	70.1437	68.708	70.0448	2.35353	2.48997	2.82668	2.65539	6.68045	7.38278	7.58479	7.28899	37.6051
188	-92.7551	-26.762	-24.5691	-24.4115	12.0672	15.6048	17.8357	17.6585	17.823	21.1825	23.6788	23.4162	7.29851	10.6487	12.6446	12.4982	71.0734	70.1437	68.708	70.0448	2.35353	2.48997	2.82668	2.65539	6.68045	7.38278	7.58479	7.28899	32.3766
189	-82.7551	-26.762	-24.5691	-24.4115	12.0672	15.6048	17.8357	17.6585	17.823	21.1825	23.6788	23.4162	7.29851	10.6487	12.6446	12.4982	71.0734	70.1437	68.708	70.0448	2.35353	2.48997	2.82668	2.65539	6.68045	7.38278	7.58479	7.28899	32.903
190	-72.7551	-26.762	-24.5691	-24.4115	12.0672	15.6048	17.8357	17.6585	17.823	21.1825	23.6788	23.4162	7.29851	10.6487	12.6446	12.4982	71.0734	70.1437	68.708	70.0448	2.35353	2.48997	2.82668	2.65539	6.68045	7.38278	7.58479	7.28899	33.4246
191	-62.7551	-26.762	-24.5691	-24.4115	12.0672	15.6048	17.8357	17.6585	17.823	21.1825	23.6788	23.4162	7.29851	10.6487	12.6446	12.4982	71.0734	70.1437	68.708	70.0448	2.35353	2.48997	2.82668	2.65539	6.68045	7.38278	7.58479	7.28899	33.9417
192	-52.7551	-26.762	-24.5691	-24.4115	12.0672	15.6048	17.8357	17.6585	17.823	21.1825	23.6788	23.4162	7.29851	10.6487	12.6446	12.4982	71.0734	70.1437	68.708	70.0448	2.35353	2.48997	2.82668	2.65539	6.68045	7.38278	7.58479	7.28899	34.4546
193	-42.7551	-26.762	-24.5691	-24.4115	12.0672	15.6048	17.8357	17.6585	17.823	21.1825	23.6788	23.4162	7.29851	10.6487	12.6446	12.4982	71.0734	70.1437	68.708	70.0448	2.35353	2.48997	2.82668	2.65539	6.68045	7.38278	7.58479	7.28899	34.9638
194	-32.7551	-26.762	-24.5691	-24.4115	12.0672	15.6048	17.8357	17.6585	17.823	21.1825	23.6788	23.4162	7.29851	10.6487	12.6446	12.4982	71.0734	70.1437	68.708	70.0448	2.35353	2.48997	2.82668	2.65539	6.68045	7.38278	7.58479	7.28899	35.4695
195	-22.7551	-26.762	-24.5691	-24.4115	12.0672	15.6048	17.8357	17.6585	17.823	21.1825	23.6788	23.4162	7.29851	10.6487	12.6446	12.4982	71.0734	70.1437	68.708	70.0448	2.35353	2.48997	2.82668	2.65539	6.68045	7.38278	7.58479	7.28899	35.9722
196	-12.7551	-26.762	-24.5691	-24.4115	12.0672	15.6048	17.8357	17.6585	17.823	21.1825	23.6788	23.4162	7.29851	10.6487	12.6446	12.4982	71.0734	70.1437	68.708	70.0448	2.35353	2.48997	2.82668	2.65539	6.68045	7.38278	7.58479	7.28899	36.472
197	-2.7551	-26.762	-24.5691	-24.4115	12.0672	15.6048	17.8357	17.6585	17.823	21.1825	23.6788	23.4162	7.29851	10.6487	12.6446	12.4982	71.0734	70.1437	68.708	70.0448	2.35353	2.48997	2.82668	2.65539	6.68045	7.38278	7.58479	7.28899	36.9693
198	7.2449	-26.762	-24.5691	-24.4115	12.0672	15.6048	17.8357	17.6585	17.823	21.1825	23.6788	23.4162	7.29851	10.6487	12.6446	12.4982	71.0734	70.1437	68.708	70.0448	2.35353	2.48997	2.82668	2.65539	6.68045	7.38278	7.58479	7.28899	37.4645
199	-92.7551	-26.762	-24.5691	-24.4115	12.0672	15.6048	17.8357	17.6585	18.023	21.1825	23.6788	23.4162	7.29851	10.6487	12.6446	12.4982	71.0734	70.1437	68.708	70.0448	2.35353	2.48997	2.82668	2.65539	6.68045	7.38278	7.58479	7.28899	32.2452
200	-82.7551	-26.762	-24.5691	-24.4115	12.0672	15.6048	17.8357	17.6585	18.023	21.1825	23.6788	23.4162	7.29851	10.6487	12.6446	12.4982	71.0734	70.1437	68.708	70.0448	2.35353	2.48997	2.82668	2.65539	6.68045	7.38278	7.58479	7.28899	32.7707
201	-72.7551	-26.762	-24.5691	-24.4115	12.0672	15.6048	17.8357	17.6585	18.023	21.1825	23.6788	23.4162	7.29851	10.6487	12.6446	12.4982	71.0734	70.1437	68.708	70.0448	2.35353	2.48997	2.82668	2.65539	6.68045	7.38278	7.58479	7.28899	33.2913
202	-62.7551	-26.762	-24.5691	-24.4115	12.0672	15.6048	17.8357	17.6585	18.023	21.1825	23.6788	23.4162	7.29851	10.6487	12.6446	12.4982	71.0734	70.1437	68.708	70.0448	2.35353	2.48997	2.82668	2.65539	6.68045	7.38278	7.58479	7.28899	33.8075
203	-52.7551	-26.762	-24.5691	-24.4115	12.0672	15.6048	17.8357	17.6585	18.023	21.1825	23.6788	23.4162	7.29851	10.6487	12.6446	12.4982	71.0734	70.1437	68.708	70.0448	2.35353	2.48997	2.82668	2.65539	6.68045	7.38278	7.58479	7.28899	34.3195
204	-42.7551	-26.762	-24.5691	-24.4115	12.0672	15.6048	17.8357	17.6585	18.023	21.1825	23.6788	23.4162	7.29851	10.6487	12.6446	12.4982	71.0734	70.1437	68.708	70.0448	2.35353	2.48997	2.82668	2.65539	6.68045	7.38278	7.58479	7.28899	34.8278
205	-32.7551	-26.762	-24.5691	-24.4115	12.0672	15.6048	17.8357	17.6585	18.023	21.1825	23.6788	23.4162	7.29851	10.6487	12.6446	12.4982	71.0734	70.1437	68.708	70.0448	2.35353	2.48997	2.82668	2.65539	6.68045	7.38278	7.58479	7.28899	35.3326
206	-22.7551	-26.762	-24.5691	-24.4115	12.0672	15.6048	17.8357	17.6585	18.023	21.1825	23.6788	23.4162	7.29851	10.6487	12.6446	12.4982	71.0734	70.1437	68.708	70.0448	2.35353	2.48997	2.82668	2.65539	6.68045	7.38278	7.58479	7.28899	35.8344
207	-12.7551	-26.762	-24.5691	-24.4115	12.0672	15.6048	17.8357	17.6585	18.023	21.1825	23.6788	23.4162	7.29851	10.6487	12.6446	12.4982	71.0734	70.1437	68.708	70.0448	2.35353	2.48997	2.82668	2.65539	6.68045	7.38278	7.58479	7.28899	36.3334
208	-2.7551	-26.762	-24.5691	-24.4115	12.0672	15.6048	17.8357	17.6585	18.023	21.1825	23.6788	23.4162	7.29851	10.6487	12.6446	12.4982	71.0734	70.1437	68.708	70.0448	2.35353	2.48997	2.82668	2.65539	6.68045	7.38278	7.58479	7.28899	36.83
209	7.2449	-26.762	-24.5691	-24.4115	12.0672	15.6048	17.8357	17.6585	18.023	21.1825	23.6788	23.4162	7.29851	10.6487	12.6446	12.4982	71.0734	70.1437	68.708	70.0448	2.35353	2.48997	2.82668	2.65539	6.68045	7.38278	7.58479	7.28899	37.3245
210	-92.7551	-26.762	-24.5691	-24.4115	12.0672	15.6048	17.8357	17.6585	18.223	21.1825	23.6788	23.4162	7.29851	10.6487	12.6446	12.4982	71.0734	70.1437	68.708	70.0448	2.35353	2.48997	2.82668	2.65539	6.68045	7.38278	7.58479	7.28899	32.1143
211	-82.7551	-26.762	-24.5691	-24.4115	12.0672	15.6048	17.8357	17.6585	18.223	21.1825	23.6788	23.4162	7.29851	10.6487	12.6446	12.4982	71.0734	70.1437	68.708	70.0448	2.35353	2.48997	2.82668	2.65539	6.68045	7.38278	7.58479	7.28899	32.6388
212	-72.7551	-26.762	-24.5691	-24.4115	12.0672	15.6048	17.8357	17.6585	18.223	21.1825	23.6788	23.4162	7.29851	10.6487	12.6446	12.4982	71.0734	70.1437	68.708	70.0448	2.35353	2.48997	2.82668	2.65539	6.68045	7.38278	7.58479	7.28899	33.1585
213	-62.7551	-26.762	-24.5691	-24.4115	12.0672	15.6048	17.8357	17.6585	18.223	21.1825	23.6788	23.4162	7.29851	10.6487	12.6446	12.4982	71.0734	70.1437	68.708	70.0448	2.35353	2.48997	2.82668	2.65539	6.68045	7.38278	7.58479	7.28899	33.6738
214	-52.7551	-26.762	-24.5691	-24.4115	12.0672	15.6048	17.8357	17.6585	18.223	21.1825	23.6788	23.4162	7.29851	10.6487	12.6446	12.4982	71.0734	70.1437	68.708	70.0448	2.35353	2.48997	2.82668	2.65539	6.68045	7.38278	7.58479	7.28899	34.1849
215	-42.7551	-26.762	-24.5691	-24.4115	12.0672	15.6048	17.8357	17.6585	18.223	21.1825	23.6788	23.4162	7.29851	10.6487	12.6446	12.4982	71.0734	70.1437	68.708	70.0448	2.35353	2.48997	2.82668	2.65539	6.68045	7.38278	7.58479	7.28899	34.6923
216	-32.7551	-26.762	-24.5691	-24.4115	12.0672	15.6048	17.8357	17.6585	18.223	21.1825	23.6788	23.4162	7.29851	10.6487	12.6446	12.4982	71.0734	70.1437	68.708	70.0448	2.35353	2.48997	2.82668	2.65539	6.68045	7.38278	7.58479	7.28899	35.1963
217	-22.7551	-26.762	-24.5691	-24.4115	12.0672	15.6048	17.8357	17.6585	18.223	21.1825	23.6788	23.4162	7.29851	10.6487	12.6446	12.4982	71.0734	70.1437	68.708	70.0448	2.35353	2.48997	2.82668	2.65539	6.68045	7.38278	7.58479	7.28899	35.6972
218	-12.7551	-26.762	-24.5691	-24.4115	12.0672	15.6048	17.8357	17.6585	18.223	21.1825	23.6788	23.4162	7.29851	10.6487	12.6446	12.4982	71.0734	70.1437	68.708	70.0448	2.35353	2.48997	2.82668	2.65539	6.68045	7.38278	7.58479	7.28899	36.1954
219	-2.7551	-26.762	-24.5691	-24.4115	12.0672	15.6048	17.8357	17.6585	18.223	21.1825	23.6788	23.4162	7.29851	10.6487	12.6446	12.4982	71.0734	70.1437	68.708	70.0448	2.35353	2.48997	2.82668	2.65539	6.68045	7.38278	7.58479	7.28899	36.6913
220	7.2449	-26.762	-24.5691	-24.4115	12.0672	15.6048	17.8357	17.6585	18.223	21.1825	23.6788	23.4162	7.29851	10.6487	12.6446	12.4982	71.0734	70.1437	68.708	70.0448	2.35353	2.48997	2.82668	2.65539	6.68045	7.38278	7.58479	7.28899	37.1851
221	-92.7551	-26.762	-24.5691	-24.4115	12.0672	15.6048	17.8357	17.6585	18.423	21.1825	23.6788	23.4162	7.29851	10.6487	12.6446	12.4982	71.0734	70.1437	68.708	70.0448	2.35353	2.48997	2.82668	2.65539	6.68045	7.38278	7.58479	7.28899	31.9837
222	-82.7551	-26.762	-24.5691	-24.4115	12.0672	15.6048	17.8357	17.6585	18.423	21.1825	23.6788	23.4162	7.29851	10.6487	12.6446	12.4982	71.0734	70.1437	68.708	70.0448	2.35353	2.48997	2.82668	2.65539	6.68045	7.38278	7.58479	7.28899	32.5074
223	-72.7551	-26.762	-24.5691	-24.4115	12.0672	15.6048	17.8357	17.6585	18.423	21.1825	23.6788	23.4162	7.29851	10.6487	12.6446	12.4982	71.0734	70.1437	68.708	70.0448	2.35353	2.48997	2.82668	2.65539	6.68045	7.38278	7.58479	7.28899	33.0262
224	-62.7551	-26.762	-24.5691	-24.4115	12.0672	15.6048	17.8357	17.6585	18.423	21.1825	23.6788	23.4162	7.29851	10.6487	12.6446	12.4982	71.0734	70.1437	68.708	70.0448	2.35353	2.48997	2.82668	2.65539	6.68045	7.38278	7.58479	7.28899	33.5405
225	-52.7551	-26.762	-24.5691	-24.4115	12.0672	15.6048	17.8357	17.6585	18.423	21.1825	23.6788	23.4162	7.29851	10.6487	12.6446	12.4982	71.0734	70.1437	68.708	70.0448	2.35353	2.48997	2.82668	2.65539	6.68045	7.38278	7.58479	7.28899	34.0508
226	-42.7551	-26.762	-24.5691	-24.4115	12.0672	15.6048	17.8357	17.6585	18.423	21.1825	23.6788	23.4162	7.29851	10.6487	12.6446	12.4982	71.0734	70.1437	68.708	70.0448	2.35353	2.48997	2.82668	2.65539	6.68045	7.38278	7.58479	7.28899	34.5573
227	-32.7551	-26.762	-24.5691	-24.4115	12.0672	15.6048	17.8357	17.6585	18.423	21.1825	23.6788	23.4162	7.29851	10.6487	12.6446	12.4982	71.0734	70.1437	68.708	70.0448	2.35353	2.48997	2.82668	2.65539	6.68045	7.38278	7.58479	7.28899	35.0604
228	-22.7551	-26.762	-24.5691	-24.4115	12.0672	15.6048	17.8357	17.6585	18.423	21.1825	23.6788	23.4162	7.29851	10.6487	12.6446	12.4982	71.0734	70.1437	68.708	70.0448	2.35353	2.48997	2.82668	2.65539	6.68045	7.38278	7.58479	7.28899	35.5606
229	-12.7551	-26.762	-24.5691	-24.4115	12.0672	15.6048	17.8357	17.6585	18.423	21.1825	23.6788	23.4162	7.29851	10.6487	12.6446	12.4982	71.0734	70.1437	68.708	70.0448	2.35353	2.48997	2.82668	2.65539	6.68045	7.38278	7.58479	7.28899	36.058
230	-2.7551	-26.762	-24.5691	-24.4115	12.0672	15.6048	17.8357	17.6585	18.423	21.1825	23.6788	23.4162	7.29851	10.6487	12.6446	12.4982	71.0734	70.1437	68.708	70.0448	2.35353	2.48997	2.82668	2.65539	6.68045	7.38278	7.58479	7.28899	36.5531
231	7.2449	-26.762	-24.5691	-24.4115	12.0672	15.6048	17.8357	17.6585	18.423	21.1825	23.6788	23.4162	7.29851	10.6487	12.6446	12.4982	71.0734	70.1437	68.708	70.0448	2.35353	2.48997	2.82668	2.65539	6.68045	7.38278	7.58479	7.28899	37.0462
232	-92.7551	-26.762	-24.5691	-24.4115	12.0672	15.6048	17.8357	17.6585	18.623	21.1825	23.6788	23.4162	7.29851	10.6487	12.6446	12.4982	71.0734	70.1437	68.708	70.0448	2.35353	2.48997	2.82668	2.65539	6.68045	7.38278	7.58479	7.28899	31.8536
233	-82.7551	-26.762	-24.5691	-24.4115	12.0672	15.6048	17.8357	17.6585	18.623	21.1825	23.6788	23.4162	7.29851	10.6487	12.6446	12.4982	71.0734	70.1437	68.708	70.0448	2.35353	2.48997	2.82668	2.65539	6.68045	7.38278	7.58479	7.28899	32.3763
234	-72.7551	-26.762	-24.5691	-24.4115	12.0672	15.6048	17.8357	17.6585	18.623	21.1825	23.6788	23.4162	7.29851	10.6487	12.6446	12.4982	71.0734	70.1437	68.708	70.0448	2.35353	2.48997	2.82668	2.65539	6.68045	7.38278	7.58479	7.28899	32.8943
235	-62.7551	-26.762	-24.5691	-24.4115	12.0672	15.6048	17.8357	17.6585	18.623	21.1825	23.6788	23.4162	7.29851	10.6487	12.6446	12.4982	71.0734	70.1437	68.708	70.0448	2.35353	2.48997	2.82668	2.65539	6.68045	7.38278	7.58479	7.28899	33.4078
236	-52.7551	-26.762	-24.5691	-24.4115	12.0672	15.6048	17.8357	17.6585	18.623	21.1825	23.6788	23.4162	7.29851	10.6487	12.6446	12.4982	71.0734	70.1437	68.708	70.0448	2.35353	2.48997	2.82668	2.65539	6.68045	7.38278	7.58479	7.28899	33.9172
237	-42.7551	-26.762	-24.5691	-24.4115	12.0672	15.6048	17.8357	17.6585	18.623	21.1825	23.6788	23.4162	7.29851	10.6487	12.6446	12.4982	71.0734	70.1437	68.708	70.0448	2.35353	2.48997	2.82668	2.65539	6.68045	7.38278	7.58479	7.28899	34.4228
238	-32.7551	-26.762	-24.5691	-24.4115	12.0672	15.6048	17.8357	17.6585	18.623	21.1825	23.6788	23.4162	7.29851	10.6487	12.6446	12.4982	71.0734	70.1437	68.708	70.0448	2.35353	2.48997	2.82668	2.65539	6.68045	7.38278	7.58479	7.28899	34.9251
239	-22.7551	-26.762	-24.5691	-24.4115	12.0672	15.6048	17.8357	17.6585	18.623	21.1825	23.6788	23.4162	7.29851	10.6487	12.6446	12.4982	71.0734	70.1437	68.708	70.0448	2.35353	2.48997	2.82668	2.65539	6.68045	7.38278	7.58479	7.28899	35.4244
240	-12.7551	-26.762	-24.5691	-24.4115	12.0672	15.6048	17.8357	17.6585	18.623	21.1825	23.6788	23.4162	7.29851	10.6487	12.6446	12.4982	71.0734	70.1437	68.708	70.0448	2.35353	2.48997	2.82668	2.65539	6.68045	7.38278	7.58479	7.28899	35.9211
241	-2.7551	-26.762	-24.5691	-24.4115	12.0672	15.6048	17.8357	17.6585	18.623	21.1825	23.6788	23.4162	7.29851	10.6487	12.6446	12.4982	71.0734	70.1437	68.708	70.0448	2.35353	2.48997	2.82668	2.65539	6.68045	7.38278	7.58479	7.28899	36.4155
242	7.2449	-26.762	-24.5691	-24.4115	12.0672	15.6048	17.8357	17.6585	18.623	21.1825	23.6788	23.4162	7.29851	10.6487	12.6446	12.4982	71.0734	70.1437	68.708	70.0448	2.35353	2.48997	2.82668	2.65539	6.68045	7.38278	7.58479	7.28899	36.9079

## Sheet: Table S5
Table S5. The newly predictive yeilds of Grain Maize in different regions of Czechia by ELM2 model
No.	1	2	3	4	5	6	7	8	9	10	11	12	13	14	15	16	17	18	19	20	21	22	23	24	25	26	27	28	29	30	31	32	33	34	35	36
Content	water deficit	water deficit	water deficit	water deficit	water deficit	Temp. Mean	Temp. Mean	Temp. Mean	Temp. Mean	Temp. Mean	Temp. Max	Temp. Max	Temp. Max	Temp. Max	Temp. Max	Temp Min	Temp Min	Temp Min	Temp Min	Temp Min	humidity	humidity	humidity	humidity	humidity	precipitation	precipitation	precipitation	precipitation	precipitation	Sunshine	Sunshine	Sunshine	Sunshine	Sunshine	Predictive Yield t/Ha
Units	(mm)	(mm)	(mm)	(mm)	(mm)	（℃）	（℃）	（℃）	（℃）	（℃）	（℃）	（℃）	（℃）	（℃）	（℃）	（℃）	（℃）	（℃）	（℃）	（℃）	(%)	(%)	(%)	(%)	(%)	(mm)	(mm)	(mm)	(mm)	(mm)	(hours)	(hours)	(hours)	(hours)	(hours)
Month	05	06	07	08	09	05	06	07	08	09	05	06	07	08	09	05	06	07	08	09	05	06	07	08	09	05	06	07	08	09	05	06	07	08	09
Average	-42.728	-26.7883	-25.0349	-25.8609	-18.4765	12.0645	15.6032	17.8159	17.6313	13.7185	17.6262	21.1816	23.6548	23.3855	18.6904	7.29888	10.6485	12.6369	12.4843	9.07727	71.0869	70.1473	68.7923	70.1308	76.0569	2.35763	2.49657	2.8406	2.66904	1.88803	6.68429	7.38418	7.57115	7.27897	5.8283
1	-92.728	-26.7883	-25.0349	-25.8609	-18.4765	12.0645	15.6032	17.8159	17.6313	13.7185	16.6262	21.1816	23.6548	23.3855	18.6904	7.29888	10.6485	12.6369	12.4843	9.07727	71.0869	70.1473	68.7923	70.1308	76.0569	2.35763	2.49657	2.8406	2.66904	1.88803	6.68429	7.38418	7.57115	7.27897	5.8283	5.32304
2	-82.728	-26.7883	-25.0349	-25.8609	-18.4765	12.0645	15.6032	17.8159	17.6313	13.7185	16.6262	21.1816	23.6548	23.3855	18.6904	7.29888	10.6485	12.6369	12.4843	9.07727	71.0869	70.1473	68.7923	70.1308	76.0569	2.35763	2.49657	2.8406	2.66904	1.88803	6.68429	7.38418	7.57115	7.27897	5.8283	5.49803
3	-72.728	-26.7883	-25.0349	-25.8609	-18.4765	12.0645	15.6032	17.8159	17.6313	13.7185	16.6262	21.1816	23.6548	23.3855	18.6904	7.29888	10.6485	12.6369	12.4843	9.07727	71.0869	70.1473	68.7923	70.1308	76.0569	2.35763	2.49657	2.8406	2.66904	1.88803	6.68429	7.38418	7.57115	7.27897	5.8283	5.6762
4	-62.728	-26.7883	-25.0349	-25.8609	-18.4765	12.0645	15.6032	17.8159	17.6313	13.7185	16.6262	21.1816	23.6548	23.3855	18.6904	7.29888	10.6485	12.6369	12.4843	9.07727	71.0869	70.1473	68.7923	70.1308	76.0569	2.35763	2.49657	2.8406	2.66904	1.88803	6.68429	7.38418	7.57115	7.27897	5.8283	5.85759
5	-52.728	-26.7883	-25.0349	-25.8609	-18.4765	12.0645	15.6032	17.8159	17.6313	13.7185	16.6262	21.1816	23.6548	23.3855	18.6904	7.29888	10.6485	12.6369	12.4843	9.07727	71.0869	70.1473	68.7923	70.1308	76.0569	2.35763	2.49657	2.8406	2.66904	1.88803	6.68429	7.38418	7.57115	7.27897	5.8283	6.04225
6	-42.728	-26.7883	-25.0349	-25.8609	-18.4765	12.0645	15.6032	17.8159	17.6313	13.7185	16.6262	21.1816	23.6548	23.3855	18.6904	7.29888	10.6485	12.6369	12.4843	9.07727	71.0869	70.1473	68.7923	70.1308	76.0569	2.35763	2.49657	2.8406	2.66904	1.88803	6.68429	7.38418	7.57115	7.27897	5.8283	6.2302
7	-32.728	-26.7883	-25.0349	-25.8609	-18.4765	12.0645	15.6032	17.8159	17.6313	13.7185	16.6262	21.1816	23.6548	23.3855	18.6904	7.29888	10.6485	12.6369	12.4843	9.07727	71.0869	70.1473	68.7923	70.1308	76.0569	2.35763	2.49657	2.8406	2.66904	1.88803	6.68429	7.38418	7.57115	7.27897	5.8283	6.42145
8	-22.728	-26.7883	-25.0349	-25.8609	-18.4765	12.0645	15.6032	17.8159	17.6313	13.7185	16.6262	21.1816	23.6548	23.3855	18.6904	7.29888	10.6485	12.6369	12.4843	9.07727	71.0869	70.1473	68.7923	70.1308	76.0569	2.35763	2.49657	2.8406	2.66904	1.88803	6.68429	7.38418	7.57115	7.27897	5.8283	6.61596
9	-12.728	-26.7883	-25.0349	-25.8609	-18.4765	12.0645	15.6032	17.8159	17.6313	13.7185	16.6262	21.1816	23.6548	23.3855	18.6904	7.29888	10.6485	12.6369	12.4843	9.07727	71.0869	70.1473	68.7923	70.1308	76.0569	2.35763	2.49657	2.8406	2.66904	1.88803	6.68429	7.38418	7.57115	7.27897	5.8283	6.81372
10	-2.72797	-26.7883	-25.0349	-25.8609	-18.4765	12.0645	15.6032	17.8159	17.6313	13.7185	16.6262	21.1816	23.6548	23.3855	18.6904	7.29888	10.6485	12.6369	12.4843	9.07727	71.0869	70.1473	68.7923	70.1308	76.0569	2.35763	2.49657	2.8406	2.66904	1.88803	6.68429	7.38418	7.57115	7.27897	5.8283	7.01465
11	7.27203	-26.7883	-25.0349	-25.8609	-18.4765	12.0645	15.6032	17.8159	17.6313	13.7185	16.6262	21.1816	23.6548	23.3855	18.6904	7.29888	10.6485	12.6369	12.4843	9.07727	71.0869	70.1473	68.7923	70.1308	76.0569	2.35763	2.49657	2.8406	2.66904	1.88803	6.68429	7.38418	7.57115	7.27897	5.8283	7.21867
12	-92.728	-26.7883	-25.0349	-25.8609	-18.4765	12.0645	15.6032	17.8159	17.6313	13.7185	16.8262	21.1816	23.6548	23.3855	18.6904	7.29888	10.6485	12.6369	12.4843	9.07727	71.0869	70.1473	68.7923	70.1308	76.0569	2.35763	2.49657	2.8406	2.66904	1.88803	6.68429	7.38418	7.57115	7.27897	5.8283	5.35254
13	-82.728	-26.7883	-25.0349	-25.8609	-18.4765	12.0645	15.6032	17.8159	17.6313	13.7185	16.8262	21.1816	23.6548	23.3855	18.6904	7.29888	10.6485	12.6369	12.4843	9.07727	71.0869	70.1473	68.7923	70.1308	76.0569	2.35763	2.49657	2.8406	2.66904	1.88803	6.68429	7.38418	7.57115	7.27897	5.8283	5.52842
14	-72.728	-26.7883	-25.0349	-25.8609	-18.4765	12.0645	15.6032	17.8159	17.6313	13.7185	16.8262	21.1816	23.6548	23.3855	18.6904	7.29888	10.6485	12.6369	12.4843	9.07727	71.0869	70.1473	68.7923	70.1308	76.0569	2.35763	2.49657	2.8406	2.66904	1.88803	6.68429	7.38418	7.57115	7.27897	5.8283	5.70748
15	-62.728	-26.7883	-25.0349	-25.8609	-18.4765	12.0645	15.6032	17.8159	17.6313	13.7185	16.8262	21.1816	23.6548	23.3855	18.6904	7.29888	10.6485	12.6369	12.4843	9.07727	71.0869	70.1473	68.7923	70.1308	76.0569	2.35763	2.49657	2.8406	2.66904	1.88803	6.68429	7.38418	7.57115	7.27897	5.8283	5.88979
16	-52.728	-26.7883	-25.0349	-25.8609	-18.4765	12.0645	15.6032	17.8159	17.6313	13.7185	16.8262	21.1816	23.6548	23.3855	18.6904	7.29888	10.6485	12.6369	12.4843	9.07727	71.0869	70.1473	68.7923	70.1308	76.0569	2.35763	2.49657	2.8406	2.66904	1.88803	6.68429	7.38418	7.57115	7.27897	5.8283	6.07538
17	-42.728	-26.7883	-25.0349	-25.8609	-18.4765	12.0645	15.6032	17.8159	17.6313	13.7185	16.8262	21.1816	23.6548	23.3855	18.6904	7.29888	10.6485	12.6369	12.4843	9.07727	71.0869	70.1473	68.7923	70.1308	76.0569	2.35763	2.49657	2.8406	2.66904	1.88803	6.68429	7.38418	7.57115	7.27897	5.8283	6.26428
18	-32.728	-26.7883	-25.0349	-25.8609	-18.4765	12.0645	15.6032	17.8159	17.6313	13.7185	16.8262	21.1816	23.6548	23.3855	18.6904	7.29888	10.6485	12.6369	12.4843	9.07727	71.0869	70.1473	68.7923	70.1308	76.0569	2.35763	2.49657	2.8406	2.66904	1.88803	6.68429	7.38418	7.57115	7.27897	5.8283	6.45648
19	-22.728	-26.7883	-25.0349	-25.8609	-18.4765	12.0645	15.6032	17.8159	17.6313	13.7185	16.8262	21.1816	23.6548	23.3855	18.6904	7.29888	10.6485	12.6369	12.4843	9.07727	71.0869	70.1473	68.7923	70.1308	76.0569	2.35763	2.49657	2.8406	2.66904	1.88803	6.68429	7.38418	7.57115	7.27897	5.8283	6.65197
20	-12.728	-26.7883	-25.0349	-25.8609	-18.4765	12.0645	15.6032	17.8159	17.6313	13.7185	16.8262	21.1816	23.6548	23.3855	18.6904	7.29888	10.6485	12.6369	12.4843	9.07727	71.0869	70.1473	68.7923	70.1308	76.0569	2.35763	2.49657	2.8406	2.66904	1.88803	6.68429	7.38418	7.57115	7.27897	5.8283	6.85069
21	-2.72797	-26.7883	-25.0349	-25.8609	-18.4765	12.0645	15.6032	17.8159	17.6313	13.7185	16.8262	21.1816	23.6548	23.3855	18.6904	7.29888	10.6485	12.6369	12.4843	9.07727	71.0869	70.1473	68.7923	70.1308	76.0569	2.35763	2.49657	2.8406	2.66904	1.88803	6.68429	7.38418	7.57115	7.27897	5.8283	7.05259
22	7.27203	-26.7883	-25.0349	-25.8609	-18.4765	12.0645	15.6032	17.8159	17.6313	13.7185	16.8262	21.1816	23.6548	23.3855	18.6904	7.29888	10.6485	12.6369	12.4843	9.07727	71.0869	70.1473	68.7923	70.1308	76.0569	2.35763	2.49657	2.8406	2.66904	1.88803	6.68429	7.38418	7.57115	7.27897	5.8283	7.25759
23	-92.728	-26.7883	-25.0349	-25.8609	-18.4765	12.0645	15.6032	17.8159	17.6313	13.7185	17.0262	21.1816	23.6548	23.3855	18.6904	7.29888	10.6485	12.6369	12.4843	9.07727	71.0869	70.1473	68.7923	70.1308	76.0569	2.35763	2.49657	2.8406	2.66904	1.88803	6.68429	7.38418	7.57115	7.27897	5.8283	5.38191
24	-82.728	-26.7883	-25.0349	-25.8609	-18.4765	12.0645	15.6032	17.8159	17.6313	13.7185	17.0262	21.1816	23.6548	23.3855	18.6904	7.29888	10.6485	12.6369	12.4843	9.07727	71.0869	70.1473	68.7923	70.1308	76.0569	2.35763	2.49657	2.8406	2.66904	1.88803	6.68429	7.38418	7.57115	7.27897	5.8283	5.55867
25	-72.728	-26.7883	-25.0349	-25.8609	-18.4765	12.0645	15.6032	17.8159	17.6313	13.7185	17.0262	21.1816	23.6548	23.3855	18.6904	7.29888	10.6485	12.6369	12.4843	9.07727	71.0869	70.1473	68.7923	70.1308	76.0569	2.35763	2.49657	2.8406	2.66904	1.88803	6.68429	7.38418	7.57115	7.27897	5.8283	5.73864
26	-62.728	-26.7883	-25.0349	-25.8609	-18.4765	12.0645	15.6032	17.8159	17.6313	13.7185	17.0262	21.1816	23.6548	23.3855	18.6904	7.29888	10.6485	12.6369	12.4843	9.07727	71.0869	70.1473	68.7923	70.1308	76.0569	2.35763	2.49657	2.8406	2.66904	1.88803	6.68429	7.38418	7.57115	7.27897	5.8283	5.92187
27	-52.728	-26.7883	-25.0349	-25.8609	-18.4765	12.0645	15.6032	17.8159	17.6313	13.7185	17.0262	21.1816	23.6548	23.3855	18.6904	7.29888	10.6485	12.6369	12.4843	9.07727	71.0869	70.1473	68.7923	70.1308	76.0569	2.35763	2.49657	2.8406	2.66904	1.88803	6.68429	7.38418	7.57115	7.27897	5.8283	6.10841
28	-42.728	-26.7883	-25.0349	-25.8609	-18.4765	12.0645	15.6032	17.8159	17.6313	13.7185	17.0262	21.1816	23.6548	23.3855	18.6904	7.29888	10.6485	12.6369	12.4843	9.07727	71.0869	70.1473	68.7923	70.1308	76.0569	2.35763	2.49657	2.8406	2.66904	1.88803	6.68429	7.38418	7.57115	7.27897	5.8283	6.29826
29	-32.728	-26.7883	-25.0349	-25.8609	-18.4765	12.0645	15.6032	17.8159	17.6313	13.7185	17.0262	21.1816	23.6548	23.3855	18.6904	7.29888	10.6485	12.6369	12.4843	9.07727	71.0869	70.1473	68.7923	70.1308	76.0569	2.35763	2.49657	2.8406	2.66904	1.88803	6.68429	7.38418	7.57115	7.27897	5.8283	6.49143
30	-22.728	-26.7883	-25.0349	-25.8609	-18.4765	12.0645	15.6032	17.8159	17.6313	13.7185	17.0262	21.1816	23.6548	23.3855	18.6904	7.29888	10.6485	12.6369	12.4843	9.07727	71.0869	70.1473	68.7923	70.1308	76.0569	2.35763	2.49657	2.8406	2.66904	1.88803	6.68429	7.38418	7.57115	7.27897	5.8283	6.68788
31	-12.728	-26.7883	-25.0349	-25.8609	-18.4765	12.0645	15.6032	17.8159	17.6313	13.7185	17.0262	21.1816	23.6548	23.3855	18.6904	7.29888	10.6485	12.6369	12.4843	9.07727	71.0869	70.1473	68.7923	70.1308	76.0569	2.35763	2.49657	2.8406	2.66904	1.88803	6.68429	7.38418	7.57115	7.27897	5.8283	6.88758
32	-2.72797	-26.7883	-25.0349	-25.8609	-18.4765	12.0645	15.6032	17.8159	17.6313	13.7185	17.0262	21.1816	23.6548	23.3855	18.6904	7.29888	10.6485	12.6369	12.4843	9.07727	71.0869	70.1473	68.7923	70.1308	76.0569	2.35763	2.49657	2.8406	2.66904	1.88803	6.68429	7.38418	7.57115	7.27897	5.8283	7.09046
33	7.27203	-26.7883	-25.0349	-25.8609	-18.4765	12.0645	15.6032	17.8159	17.6313	13.7185	17.0262	21.1816	23.6548	23.3855	18.6904	7.29888	10.6485	12.6369	12.4843	9.07727	71.0869	70.1473	68.7923	70.1308	76.0569	2.35763	2.49657	2.8406	2.66904	1.88803	6.68429	7.38418	7.57115	7.27897	5.8283	7.29643
34	-92.728	-26.7883	-25.0349	-25.8609	-18.4765	12.0645	15.6032	17.8159	17.6313	13.7185	17.2262	21.1816	23.6548	23.3855	18.6904	7.29888	10.6485	12.6369	12.4843	9.07727	71.0869	70.1473	68.7923	70.1308	76.0569	2.35763	2.49657	2.8406	2.66904	1.88803	6.68429	7.38418	7.57115	7.27897	5.8283	5.41115
35	-82.728	-26.7883	-25.0349	-25.8609	-18.4765	12.0645	15.6032	17.8159	17.6313	13.7185	17.2262	21.1816	23.6548	23.3855	18.6904	7.29888	10.6485	12.6369	12.4843	9.07727	71.0869	70.1473	68.7923	70.1308	76.0569	2.35763	2.49657	2.8406	2.66904	1.88803	6.68429	7.38418	7.57115	7.27897	5.8283	5.5888
36	-72.728	-26.7883	-25.0349	-25.8609	-18.4765	12.0645	15.6032	17.8159	17.6313	13.7185	17.2262	21.1816	23.6548	23.3855	18.6904	7.29888	10.6485	12.6369	12.4843	9.07727	71.0869	70.1473	68.7923	70.1308	76.0569	2.35763	2.49657	2.8406	2.66904	1.88803	6.68429	7.38418	7.57115	7.27897	5.8283	5.76968
37	-62.728	-26.7883	-25.0349	-25.8609	-18.4765	12.0645	15.6032	17.8159	17.6313	13.7185	17.2262	21.1816	23.6548	23.3855	18.6904	7.29888	10.6485	12.6369	12.4843	9.07727	71.0869	70.1473	68.7923	70.1308	76.0569	2.35763	2.49657	2.8406	2.66904	1.88803	6.68429	7.38418	7.57115	7.27897	5.8283	5.95385
38	-52.728	-26.7883	-25.0349	-25.8609	-18.4765	12.0645	15.6032	17.8159	17.6313	13.7185	17.2262	21.1816	23.6548	23.3855	18.6904	7.29888	10.6485	12.6369	12.4843	9.07727	71.0869	70.1473	68.7923	70.1308	76.0569	2.35763	2.49657	2.8406	2.66904	1.88803	6.68429	7.38418	7.57115	7.27897	5.8283	6.14133
39	-42.728	-26.7883	-25.0349	-25.8609	-18.4765	12.0645	15.6032	17.8159	17.6313	13.7185	17.2262	21.1816	23.6548	23.3855	18.6904	7.29888	10.6485	12.6369	12.4843	9.07727	71.0869	70.1473	68.7923	70.1308	76.0569	2.35763	2.49657	2.8406	2.66904	1.88803	6.68429	7.38418	7.57115	7.27897	5.8283	6.33214
40	-32.728	-26.7883	-25.0349	-25.8609	-18.4765	12.0645	15.6032	17.8159	17.6313	13.7185	17.2262	21.1816	23.6548	23.3855	18.6904	7.29888	10.6485	12.6369	12.4843	9.07727	71.0869	70.1473	68.7923	70.1308	76.0569	2.35763	2.49657	2.8406	2.66904	1.88803	6.68429	7.38418	7.57115	7.27897	5.8283	6.52628
41	-22.728	-26.7883	-25.0349	-25.8609	-18.4765	12.0645	15.6032	17.8159	17.6313	13.7185	17.2262	21.1816	23.6548	23.3855	18.6904	7.29888	10.6485	12.6369	12.4843	9.07727	71.0869	70.1473	68.7923	70.1308	76.0569	2.35763	2.49657	2.8406	2.66904	1.88803	6.68429	7.38418	7.57115	7.27897	5.8283	6.72371
42	-12.728	-26.7883	-25.0349	-25.8609	-18.4765	12.0645	15.6032	17.8159	17.6313	13.7185	17.2262	21.1816	23.6548	23.3855	18.6904	7.29888	10.6485	12.6369	12.4843	9.07727	71.0869	70.1473	68.7923	70.1308	76.0569	2.35763	2.49657	2.8406	2.66904	1.88803	6.68429	7.38418	7.57115	7.27897	5.8283	6.92438
43	-2.72797	-26.7883	-25.0349	-25.8609	-18.4765	12.0645	15.6032	17.8159	17.6313	13.7185	17.2262	21.1816	23.6548	23.3855	18.6904	7.29888	10.6485	12.6369	12.4843	9.07727	71.0869	70.1473	68.7923	70.1308	76.0569	2.35763	2.49657	2.8406	2.66904	1.88803	6.68429	7.38418	7.57115	7.27897	5.8283	7.12824
44	7.27203	-26.7883	-25.0349	-25.8609	-18.4765	12.0645	15.6032	17.8159	17.6313	13.7185	17.2262	21.1816	23.6548	23.3855	18.6904	7.29888	10.6485	12.6369	12.4843	9.07727	71.0869	70.1473	68.7923	70.1308	76.0569	2.35763	2.49657	2.8406	2.66904	1.88803	6.68429	7.38418	7.57115	7.27897	5.8283	7.33518
45	-92.728	-26.7883	-25.0349	-25.8609	-18.4765	12.0645	15.6032	17.8159	17.6313	13.7185	17.4262	21.1816	23.6548	23.3855	18.6904	7.29888	10.6485	12.6369	12.4843	9.07727	71.0869	70.1473	68.7923	70.1308	76.0569	2.35763	2.49657	2.8406	2.66904	1.88803	6.68429	7.38418	7.57115	7.27897	5.8283	5.44025
46	-82.728	-26.7883	-25.0349	-25.8609	-18.4765	12.0645	15.6032	17.8159	17.6313	13.7185	17.4262	21.1816	23.6548	23.3855	18.6904	7.29888	10.6485	12.6369	12.4843	9.07727	71.0869	70.1473	68.7923	70.1308	76.0569	2.35763	2.49657	2.8406	2.66904	1.88803	6.68429	7.38418	7.57115	7.27897	5.8283	5.61881
47	-72.728	-26.7883	-25.0349	-25.8609	-18.4765	12.0645	15.6032	17.8159	17.6313	13.7185	17.4262	21.1816	23.6548	23.3855	18.6904	7.29888	10.6485	12.6369	12.4843	9.07727	71.0869	70.1473	68.7923	70.1308	76.0569	2.35763	2.49657	2.8406	2.66904	1.88803	6.68429	7.38418	7.57115	7.27897	5.8283	5.80061
48	-62.728	-26.7883	-25.0349	-25.8609	-18.4765	12.0645	15.6032	17.8159	17.6313	13.7185	17.4262	21.1816	23.6548	23.3855	18.6904	7.29888	10.6485	12.6369	12.4843	9.07727	71.0869	70.1473	68.7923	70.1308	76.0569	2.35763	2.49657	2.8406	2.66904	1.88803	6.68429	7.38418	7.57115	7.27897	5.8283	5.98571
49	-52.728	-26.7883	-25.0349	-25.8609	-18.4765	12.0645	15.6032	17.8159	17.6313	13.7185	17.4262	21.1816	23.6548	23.3855	18.6904	7.29888	10.6485	12.6369	12.4843	9.07727	71.0869	70.1473	68.7923	70.1308	76.0569	2.35763	2.49657	2.8406	2.66904	1.88803	6.68429	7.38418	7.57115	7.27897	5.8283	6.17415
50	-42.728	-26.7883	-25.0349	-25.8609	-18.4765	12.0645	15.6032	17.8159	17.6313	13.7185	17.4262	21.1816	23.6548	23.3855	18.6904	7.29888	10.6485	12.6369	12.4843	9.07727	71.0869	70.1473	68.7923	70.1308	76.0569	2.35763	2.49657	2.8406	2.66904	1.88803	6.68429	7.38418	7.57115	7.27897	5.8283	6.36592
51	-32.728	-26.7883	-25.0349	-25.8609	-18.4765	12.0645	15.6032	17.8159	17.6313	13.7185	17.4262	21.1816	23.6548	23.3855	18.6904	7.29888	10.6485	12.6369	12.4843	9.07727	71.0869	70.1473	68.7923	70.1308	76.0569	2.35763	2.49657	2.8406	2.66904	1.88803	6.68429	7.38418	7.57115	7.27897	5.8283	6.56103
52	-22.728	-26.7883	-25.0349	-25.8609	-18.4765	12.0645	15.6032	17.8159	17.6313	13.7185	17.4262	21.1816	23.6548	23.3855	18.6904	7.29888	10.6485	12.6369	12.4843	9.07727	71.0869	70.1473	68.7923	70.1308	76.0569	2.35763	2.49657	2.8406	2.66904	1.88803	6.68429	7.38418	7.57115	7.27897	5.8283	6.75944
53	-12.728	-26.7883	-25.0349	-25.8609	-18.4765	12.0645	15.6032	17.8159	17.6313	13.7185	17.4262	21.1816	23.6548	23.3855	18.6904	7.29888	10.6485	12.6369	12.4843	9.07727	71.0869	70.1473	68.7923	70.1308	76.0569	2.35763	2.49657	2.8406	2.66904	1.88803	6.68429	7.38418	7.57115	7.27897	5.8283	6.9611
54	-2.72797	-26.7883	-25.0349	-25.8609	-18.4765	12.0645	15.6032	17.8159	17.6313	13.7185	17.4262	21.1816	23.6548	23.3855	18.6904	7.29888	10.6485	12.6369	12.4843	9.07727	71.0869	70.1473	68.7923	70.1308	76.0569	2.35763	2.49657	2.8406	2.66904	1.88803	6.68429	7.38418	7.57115	7.27897	5.8283	7.16594
55	7.27203	-26.7883	-25.0349	-25.8609	-18.4765	12.0645	15.6032	17.8159	17.6313	13.7185	17.4262	21.1816	23.6548	23.3855	18.6904	7.29888	10.6485	12.6369	12.4843	9.07727	71.0869	70.1473	68.7923	70.1308	76.0569	2.35763	2.49657	2.8406	2.66904	1.88803	6.68429	7.38418	7.57115	7.27897	5.8283	7.37385
56	-92.728	-26.7883	-25.0349	-25.8609	-18.4765	12.0645	15.6032	17.8159	17.6313	13.7185	17.6262	21.1816	23.6548	23.3855	18.6904	7.29888	10.6485	12.6369	12.4843	9.07727	71.0869	70.1473	68.7923	70.1308	76.0569	2.35763	2.49657	2.8406	2.66904	1.88803	6.68429	7.38418	7.57115	7.27897	5.8283	5.46922
57	-82.728	-26.7883	-25.0349	-25.8609	-18.4765	12.0645	15.6032	17.8159	17.6313	13.7185	17.6262	21.1816	23.6548	23.3855	18.6904	7.29888	10.6485	12.6369	12.4843	9.07727	71.0869	70.1473	68.7923	70.1308	76.0569	2.35763	2.49657	2.8406	2.66904	1.88803	6.68429	7.38418	7.57115	7.27897	5.8283	5.64869
58	-72.728	-26.7883	-25.0349	-25.8609	-18.4765	12.0645	15.6032	17.8159	17.6313	13.7185	17.6262	21.1816	23.6548	23.3855	18.6904	7.29888	10.6485	12.6369	12.4843	9.07727	71.0869	70.1473	68.7923	70.1308	76.0569	2.35763	2.49657	2.8406	2.66904	1.88803	6.68429	7.38418	7.57115	7.27897	5.8283	5.83142
59	-62.728	-26.7883	-25.0349	-25.8609	-18.4765	12.0645	15.6032	17.8159	17.6313	13.7185	17.6262	21.1816	23.6548	23.3855	18.6904	7.29888	10.6485	12.6369	12.4843	9.07727	71.0869	70.1473	68.7923	70.1308	76.0569	2.35763	2.49657	2.8406	2.66904	1.88803	6.68429	7.38418	7.57115	7.27897	5.8283	6.01747
60	-52.728	-26.7883	-25.0349	-25.8609	-18.4765	12.0645	15.6032	17.8159	17.6313	13.7185	17.6262	21.1816	23.6548	23.3855	18.6904	7.29888	10.6485	12.6369	12.4843	9.07727	71.0869	70.1473	68.7923	70.1308	76.0569	2.35763	2.49657	2.8406	2.66904	1.88803	6.68429	7.38418	7.57115	7.27897	5.8283	6.20687
61	-42.728	-26.7883	-25.0349	-25.8609	-18.4765	12.0645	15.6032	17.8159	17.6313	13.7185	17.6262	21.1816	23.6548	23.3855	18.6904	7.29888	10.6485	12.6369	12.4843	9.07727	71.0869	70.1473	68.7923	70.1308	76.0569	2.35763	2.49657	2.8406	2.66904	1.88803	6.68429	7.38418	7.57115	7.27897	5.8283	6.39961
62	-32.728	-26.7883	-25.0349	-25.8609	-18.4765	12.0645	15.6032	17.8159	17.6313	13.7185	17.6262	21.1816	23.6548	23.3855	18.6904	7.29888	10.6485	12.6369	12.4843	9.07727	71.0869	70.1473	68.7923	70.1308	76.0569	2.35763	2.49657	2.8406	2.66904	1.88803	6.68429	7.38418	7.57115	7.27897	5.8283	6.5957
63	-22.728	-26.7883	-25.0349	-25.8609	-18.4765	12.0645	15.6032	17.8159	17.6313	13.7185	17.6262	21.1816	23.6548	23.3855	18.6904	7.29888	10.6485	12.6369	12.4843	9.07727	71.0869	70.1473	68.7923	70.1308	76.0569	2.35763	2.49657	2.8406	2.66904	1.88803	6.68429	7.38418	7.57115	7.27897	5.8283	6.79509
64	-12.728	-26.7883	-25.0349	-25.8609	-18.4765	12.0645	15.6032	17.8159	17.6313	13.7185	17.6262	21.1816	23.6548	23.3855	18.6904	7.29888	10.6485	12.6369	12.4843	9.07727	71.0869	70.1473	68.7923	70.1308	76.0569	2.35763	2.49657	2.8406	2.66904	1.88803	6.68429	7.38418	7.57115	7.27897	5.8283	6.99773
65	-2.72797	-26.7883	-25.0349	-25.8609	-18.4765	12.0645	15.6032	17.8159	17.6313	13.7185	17.6262	21.1816	23.6548	23.3855	18.6904	7.29888	10.6485	12.6369	12.4843	9.07727	71.0869	70.1473	68.7923	70.1308	76.0569	2.35763	2.49657	2.8406	2.66904	1.88803	6.68429	7.38418	7.57115	7.27897	5.8283	7.20355
66	7.27203	-26.7883	-25.0349	-25.8609	-18.4765	12.0645	15.6032	17.8159	17.6313	13.7185	17.6262	21.1816	23.6548	23.3855	18.6904	7.29888	10.6485	12.6369	12.4843	9.07727	71.0869	70.1473	68.7923	70.1308	76.0569	2.35763	2.49657	2.8406	2.66904	1.88803	6.68429	7.38418	7.57115	7.27897	5.8283	7.41244
67	-92.728	-26.7883	-25.0349	-25.8609	-18.4765	12.0645	15.6032	17.8159	17.6313	13.7185	17.8262	21.1816	23.6548	23.3855	18.6904	7.29888	10.6485	12.6369	12.4843	9.07727	71.0869	70.1473	68.7923	70.1308	76.0569	2.35763	2.49657	2.8406	2.66904	1.88803	6.68429	7.38418	7.57115	7.27897	5.8283	5.49807
68	-82.728	-26.7883	-25.0349	-25.8609	-18.4765	12.0645	15.6032	17.8159	17.6313	13.7185	17.8262	21.1816	23.6548	23.3855	18.6904	7.29888	10.6485	12.6369	12.4843	9.07727	71.0869	70.1473	68.7923	70.1308	76.0569	2.35763	2.49657	2.8406	2.66904	1.88803	6.68429	7.38418	7.57115	7.27897	5.8283	5.67846
69	-72.728	-26.7883	-25.0349	-25.8609	-18.4765	12.0645	15.6032	17.8159	17.6313	13.7185	17.8262	21.1816	23.6548	23.3855	18.6904	7.29888	10.6485	12.6369	12.4843	9.07727	71.0869	70.1473	68.7923	70.1308	76.0569	2.35763	2.49657	2.8406	2.66904	1.88803	6.68429	7.38418	7.57115	7.27897	5.8283	5.86212
70	-62.728	-26.7883	-25.0349	-25.8609	-18.4765	12.0645	15.6032	17.8159	17.6313	13.7185	17.8262	21.1816	23.6548	23.3855	18.6904	7.29888	10.6485	12.6369	12.4843	9.07727	71.0869	70.1473	68.7923	70.1308	76.0569	2.35763	2.49657	2.8406	2.66904	1.88803	6.68429	7.38418	7.57115	7.27897	5.8283	6.04912
71	-52.728	-26.7883	-25.0349	-25.8609	-18.4765	12.0645	15.6032	17.8159	17.6313	13.7185	17.8262	21.1816	23.6548	23.3855	18.6904	7.29888	10.6485	12.6369	12.4843	9.07727	71.0869	70.1473	68.7923	70.1308	76.0569	2.35763	2.49657	2.8406	2.66904	1.88803	6.68429	7.38418	7.57115	7.27897	5.8283	6.23948
72	-42.728	-26.7883	-25.0349	-25.8609	-18.4765	12.0645	15.6032	17.8159	17.6313	13.7185	17.8262	21.1816	23.6548	23.3855	18.6904	7.29888	10.6485	12.6369	12.4843	9.07727	71.0869	70.1473	68.7923	70.1308	76.0569	2.35763	2.49657	2.8406	2.66904	1.88803	6.68429	7.38418	7.57115	7.27897	5.8283	6.4332
73	-32.728	-26.7883	-25.0349	-25.8609	-18.4765	12.0645	15.6032	17.8159	17.6313	13.7185	17.8262	21.1816	23.6548	23.3855	18.6904	7.29888	10.6485	12.6369	12.4843	9.07727	71.0869	70.1473	68.7923	70.1308	76.0569	2.35763	2.49657	2.8406	2.66904	1.88803	6.68429	7.38418	7.57115	7.27897	5.8283	6.63027
74	-22.728	-26.7883	-25.0349	-25.8609	-18.4765	12.0645	15.6032	17.8159	17.6313	13.7185	17.8262	21.1816	23.6548	23.3855	18.6904	7.29888	10.6485	12.6369	12.4843	9.07727	71.0869	70.1473	68.7923	70.1308	76.0569	2.35763	2.49657	2.8406	2.66904	1.88803	6.68429	7.38418	7.57115	7.27897	5.8283	6.83065
75	-12.728	-26.7883	-25.0349	-25.8609	-18.4765	12.0645	15.6032	17.8159	17.6313	13.7185	17.8262	21.1816	23.6548	23.3855	18.6904	7.29888	10.6485	12.6369	12.4843	9.07727	71.0869	70.1473	68.7923	70.1308	76.0569	2.35763	2.49657	2.8406	2.66904	1.88803	6.68429	7.38418	7.57115	7.27897	5.8283	7.03427
76	-2.72797	-26.7883	-25.0349	-25.8609	-18.4765	12.0645	15.6032	17.8159	17.6313	13.7185	17.8262	21.1816	23.6548	23.3855	18.6904	7.29888	10.6485	12.6369	12.4843	9.07727	71.0869	70.1473	68.7923	70.1308	76.0569	2.35763	2.49657	2.8406	2.66904	1.88803	6.68429	7.38418	7.57115	7.27897	5.8283	7.24107
77	7.27203	-26.7883	-25.0349	-25.8609	-18.4765	12.0645	15.6032	17.8159	17.6313	13.7185	17.8262	21.1816	23.6548	23.3855	18.6904	7.29888	10.6485	12.6369	12.4843	9.07727	71.0869	70.1473	68.7923	70.1308	76.0569	2.35763	2.49657	2.8406	2.66904	1.88803	6.68429	7.38418	7.57115	7.27897	5.8283	7.45093
78	-92.728	-26.7883	-25.0349	-25.8609	-18.4765	12.0645	15.6032	17.8159	17.6313	13.7185	18.0262	21.1816	23.6548	23.3855	18.6904	7.29888	10.6485	12.6369	12.4843	9.07727	71.0869	70.1473	68.7923	70.1308	76.0569	2.35763	2.49657	2.8406	2.66904	1.88803	6.68429	7.38418	7.57115	7.27897	5.8283	5.5268
79	-82.728	-26.7883	-25.0349	-25.8609	-18.4765	12.0645	15.6032	17.8159	17.6313	13.7185	18.0262	21.1816	23.6548	23.3855	18.6904	7.29888	10.6485	12.6369	12.4843	9.07727	71.0869	70.1473	68.7923	70.1308	76.0569	2.35763	2.49657	2.8406	2.66904	1.88803	6.68429	7.38418	7.57115	7.27897	5.8283	5.70811
80	-72.728	-26.7883	-25.0349	-25.8609	-18.4765	12.0645	15.6032	17.8159	17.6313	13.7185	18.0262	21.1816	23.6548	23.3855	18.6904	7.29888	10.6485	12.6369	12.4843	9.07727	71.0869	70.1473	68.7923	70.1308	76.0569	2.35763	2.49657	2.8406	2.66904	1.88803	6.68429	7.38418	7.57115	7.27897	5.8283	5.89272
81	-62.728	-26.7883	-25.0349	-25.8609	-18.4765	12.0645	15.6032	17.8159	17.6313	13.7185	18.0262	21.1816	23.6548	23.3855	18.6904	7.29888	10.6485	12.6369	12.4843	9.07727	71.0869	70.1473	68.7923	70.1308	76.0569	2.35763	2.49657	2.8406	2.66904	1.88803	6.68429	7.38418	7.57115	7.27897	5.8283	6.08067
82	-52.728	-26.7883	-25.0349	-25.8609	-18.4765	12.0645	15.6032	17.8159	17.6313	13.7185	18.0262	21.1816	23.6548	23.3855	18.6904	7.29888	10.6485	12.6369	12.4843	9.07727	71.0869	70.1473	68.7923	70.1308	76.0569	2.35763	2.49657	2.8406	2.66904	1.88803	6.68429	7.38418	7.57115	7.27897	5.8283	6.272
83	-42.728	-26.7883	-25.0349	-25.8609	-18.4765	12.0645	15.6032	17.8159	17.6313	13.7185	18.0262	21.1816	23.6548	23.3855	18.6904	7.29888	10.6485	12.6369	12.4843	9.07727	71.0869	70.1473	68.7923	70.1308	76.0569	2.35763	2.49657	2.8406	2.66904	1.88803	6.68429	7.38418	7.57115	7.27897	5.8283	6.4667
84	-32.728	-26.7883	-25.0349	-25.8609	-18.4765	12.0645	15.6032	17.8159	17.6313	13.7185	18.0262	21.1816	23.6548	23.3855	18.6904	7.29888	10.6485	12.6369	12.4843	9.07727	71.0869	70.1473	68.7923	70.1308	76.0569	2.35763	2.49657	2.8406	2.66904	1.88803	6.68429	7.38418	7.57115	7.27897	5.8283	6.66475
85	-22.728	-26.7883	-25.0349	-25.8609	-18.4765	12.0645	15.6032	17.8159	17.6313	13.7185	18.0262	21.1816	23.6548	23.3855	18.6904	7.29888	10.6485	12.6369	12.4843	9.07727	71.0869	70.1473	68.7923	70.1308	76.0569	2.35763	2.49657	2.8406	2.66904	1.88803	6.68429	7.38418	7.57115	7.27897	5.8283	6.86612
86	-12.728	-26.7883	-25.0349	-25.8609	-18.4765	12.0645	15.6032	17.8159	17.6313	13.7185	18.0262	21.1816	23.6548	23.3855	18.6904	7.29888	10.6485	12.6369	12.4843	9.07727	71.0869	70.1473	68.7923	70.1308	76.0569	2.35763	2.49657	2.8406	2.66904	1.88803	6.68429	7.38418	7.57115	7.27897	5.8283	7.07073
87	-2.72797	-26.7883	-25.0349	-25.8609	-18.4765	12.0645	15.6032	17.8159	17.6313	13.7185	18.0262	21.1816	23.6548	23.3855	18.6904	7.29888	10.6485	12.6369	12.4843	9.07727	71.0869	70.1473	68.7923	70.1308	76.0569	2.35763	2.49657	2.8406	2.66904	1.88803	6.68429	7.38418	7.57115	7.27897	5.8283	7.2785
88	7.27203	-26.7883	-25.0349	-25.8609	-18.4765	12.0645	15.6032	17.8159	17.6313	13.7185	18.0262	21.1816	23.6548	23.3855	18.6904	7.29888	10.6485	12.6369	12.4843	9.07727	71.0869	70.1473	68.7923	70.1308	76.0569	2.35763	2.49657	2.8406	2.66904	1.88803	6.68429	7.38418	7.57115	7.27897	5.8283	7.48934
89	-92.728	-26.7883	-25.0349	-25.8609	-18.4765	12.0645	15.6032	17.8159	17.6313	13.7185	18.2262	21.1816	23.6548	23.3855	18.6904	7.29888	10.6485	12.6369	12.4843	9.07727	71.0869	70.1473	68.7923	70.1308	76.0569	2.35763	2.49657	2.8406	2.66904	1.88803	6.68429	7.38418	7.57115	7.27897	5.8283	5.55541
90	-82.728	-26.7883	-25.0349	-25.8609	-18.4765	12.0645	15.6032	17.8159	17.6313	13.7185	18.2262	21.1816	23.6548	23.3855	18.6904	7.29888	10.6485	12.6369	12.4843	9.07727	71.0869	70.1473	68.7923	70.1308	76.0569	2.35763	2.49657	2.8406	2.66904	1.88803	6.68429	7.38418	7.57115	7.27897	5.8283	5.73764
91	-72.728	-26.7883	-25.0349	-25.8609	-18.4765	12.0645	15.6032	17.8159	17.6313	13.7185	18.2262	21.1816	23.6548	23.3855	18.6904	7.29888	10.6485	12.6369	12.4843	9.07727	71.0869	70.1473	68.7923	70.1308	76.0569	2.35763	2.49657	2.8406	2.66904	1.88803	6.68429	7.38418	7.57115	7.27897	5.8283	5.9232
92	-62.728	-26.7883	-25.0349	-25.8609	-18.4765	12.0645	15.6032	17.8159	17.6313	13.7185	18.2262	21.1816	23.6548	23.3855	18.6904	7.29888	10.6485	12.6369	12.4843	9.07727	71.0869	70.1473	68.7923	70.1308	76.0569	2.35763	2.49657	2.8406	2.66904	1.88803	6.68429	7.38418	7.57115	7.27897	5.8283	6.11212
93	-52.728	-26.7883	-25.0349	-25.8609	-18.4765	12.0645	15.6032	17.8159	17.6313	13.7185	18.2262	21.1816	23.6548	23.3855	18.6904	7.29888	10.6485	12.6369	12.4843	9.07727	71.0869	70.1473	68.7923	70.1308	76.0569	2.35763	2.49657	2.8406	2.66904	1.88803	6.68429	7.38418	7.57115	7.27897	5.8283	6.30442
94	-42.728	-26.7883	-25.0349	-25.8609	-18.4765	12.0645	15.6032	17.8159	17.6313	13.7185	18.2262	21.1816	23.6548	23.3855	18.6904	7.29888	10.6485	12.6369	12.4843	9.07727	71.0869	70.1473	68.7923	70.1308	76.0569	2.35763	2.49657	2.8406	2.66904	1.88803	6.68429	7.38418	7.57115	7.27897	5.8283	6.50011
95	-32.728	-26.7883	-25.0349	-25.8609	-18.4765	12.0645	15.6032	17.8159	17.6313	13.7185	18.2262	21.1816	23.6548	23.3855	18.6904	7.29888	10.6485	12.6369	12.4843	9.07727	71.0869	70.1473	68.7923	70.1308	76.0569	2.35763	2.49657	2.8406	2.66904	1.88803	6.68429	7.38418	7.57115	7.27897	5.8283	6.69914
96	-22.728	-26.7883	-25.0349	-25.8609	-18.4765	12.0645	15.6032	17.8159	17.6313	13.7185	18.2262	21.1816	23.6548	23.3855	18.6904	7.29888	10.6485	12.6369	12.4843	9.07727	71.0869	70.1473	68.7923	70.1308	76.0569	2.35763	2.49657	2.8406	2.66904	1.88803	6.68429	7.38418	7.57115	7.27897	5.8283	6.9015
97	-12.728	-26.7883	-25.0349	-25.8609	-18.4765	12.0645	15.6032	17.8159	17.6313	13.7185	18.2262	21.1816	23.6548	23.3855	18.6904	7.29888	10.6485	12.6369	12.4843	9.07727	71.0869	70.1473	68.7923	70.1308	76.0569	2.35763	2.49657	2.8406	2.66904	1.88803	6.68429	7.38418	7.57115	7.27897	5.8283	7.10709
98	-2.72797	-26.7883	-25.0349	-25.8609	-18.4765	12.0645	15.6032	17.8159	17.6313	13.7185	18.2262	21.1816	23.6548	23.3855	18.6904	7.29888	10.6485	12.6369	12.4843	9.07727	71.0869	70.1473	68.7923	70.1308	76.0569	2.35763	2.49657	2.8406	2.66904	1.88803	6.68429	7.38418	7.57115	7.27897	5.8283	7.31585
99	7.27203	-26.7883	-25.0349	-25.8609	-18.4765	12.0645	15.6032	17.8159	17.6313	13.7185	18.2262	21.1816	23.6548	23.3855	18.6904	7.29888	10.6485	12.6369	12.4843	9.07727	71.0869	70.1473	68.7923	70.1308	76.0569	2.35763	2.49657	2.8406	2.66904	1.88803	6.68429	7.38418	7.57115	7.27897	5.8283	7.52765
100	-92.728	-26.7883	-25.0349	-25.8609	-18.4765	12.0645	15.6032	17.8159	17.6313	13.7185	18.4262	21.1816	23.6548	23.3855	18.6904	7.29888	10.6485	12.6369	12.4843	9.07727	71.0869	70.1473	68.7923	70.1308	76.0569	2.35763	2.49657	2.8406	2.66904	1.88803	6.68429	7.38418	7.57115	7.27897	5.8283	5.5839
101	-82.728	-26.7883	-25.0349	-25.8609	-18.4765	12.0645	15.6032	17.8159	17.6313	13.7185	18.4262	21.1816	23.6548	23.3855	18.6904	7.29888	10.6485	12.6369	12.4843	9.07727	71.0869	70.1473	68.7923	70.1308	76.0569	2.35763	2.49657	2.8406	2.66904	1.88803	6.68429	7.38418	7.57115	7.27897	5.8283	5.76707
102	-72.728	-26.7883	-25.0349	-25.8609	-18.4765	12.0645	15.6032	17.8159	17.6313	13.7185	18.4262	21.1816	23.6548	23.3855	18.6904	7.29888	10.6485	12.6369	12.4843	9.07727	71.0869	70.1473	68.7923	70.1308	76.0569	2.35763	2.49657	2.8406	2.66904	1.88803	6.68429	7.38418	7.57115	7.27897	5.8283	5.95358
103	-62.728	-26.7883	-25.0349	-25.8609	-18.4765	12.0645	15.6032	17.8159	17.6313	13.7185	18.4262	21.1816	23.6548	23.3855	18.6904	7.29888	10.6485	12.6369	12.4843	9.07727	71.0869	70.1473	68.7923	70.1308	76.0569	2.35763	2.49657	2.8406	2.66904	1.88803	6.68429	7.38418	7.57115	7.27897	5.8283	6.14347
104	-52.728	-26.7883	-25.0349	-25.8609	-18.4765	12.0645	15.6032	17.8159	17.6313	13.7185	18.4262	21.1816	23.6548	23.3855	18.6904	7.29888	10.6485	12.6369	12.4843	9.07727	71.0869	70.1473	68.7923	70.1308	76.0569	2.35763	2.49657	2.8406	2.66904	1.88803	6.68429	7.38418	7.57115	7.27897	5.8283	6.33675
105	-42.728	-26.7883	-25.0349	-25.8609	-18.4765	12.0645	15.6032	17.8159	17.6313	13.7185	18.4262	21.1816	23.6548	23.3855	18.6904	7.29888	10.6485	12.6369	12.4843	9.07727	71.0869	70.1473	68.7923	70.1308	76.0569	2.35763	2.49657	2.8406	2.66904	1.88803	6.68429	7.38418	7.57115	7.27897	5.8283	6.53342
106	-32.728	-26.7883	-25.0349	-25.8609	-18.4765	12.0645	15.6032	17.8159	17.6313	13.7185	18.4262	21.1816	23.6548	23.3855	18.6904	7.29888	10.6485	12.6369	12.4843	9.07727	71.0869	70.1473	68.7923	70.1308	76.0569	2.35763	2.49657	2.8406	2.66904	1.88803	6.68429	7.38418	7.57115	7.27897	5.8283	6.73344
107	-22.728	-26.7883	-25.0349	-25.8609	-18.4765	12.0645	15.6032	17.8159	17.6313	13.7185	18.4262	21.1816	23.6548	23.3855	18.6904	7.29888	10.6485	12.6369	12.4843	9.07727	71.0869	70.1473	68.7923	70.1308	76.0569	2.35763	2.49657	2.8406	2.66904	1.88803	6.68429	7.38418	7.57115	7.27897	5.8283	6.93678
108	-12.728	-26.7883	-25.0349	-25.8609	-18.4765	12.0645	15.6032	17.8159	17.6313	13.7185	18.4262	21.1816	23.6548	23.3855	18.6904	7.29888	10.6485	12.6369	12.4843	9.07727	71.0869	70.1473	68.7923	70.1308	76.0569	2.35763	2.49657	2.8406	2.66904	1.88803	6.68429	7.38418	7.57115	7.27897	5.8283	7.14337
109	-2.72797	-26.7883	-25.0349	-25.8609	-18.4765	12.0645	15.6032	17.8159	17.6313	13.7185	18.4262	21.1816	23.6548	23.3855	18.6904	7.29888	10.6485	12.6369	12.4843	9.07727	71.0869	70.1473	68.7923	70.1308	76.0569	2.35763	2.49657	2.8406	2.66904	1.88803	6.68429	7.38418	7.57115	7.27897	5.8283	7.3531
110	7.27203	-26.7883	-25.0349	-25.8609	-18.4765	12.0645	15.6032	17.8159	17.6313	13.7185	18.4262	21.1816	23.6548	23.3855	18.6904	7.29888	10.6485	12.6369	12.4843	9.07727	71.0869	70.1473	68.7923	70.1308	76.0569	2.35763	2.49657	2.8406	2.66904	1.88803	6.68429	7.38418	7.57115	7.27897	5.8283	7.56587
111	-92.728	-26.7883	-25.0349	-25.8609	-18.4765	12.0645	15.6032	17.8159	17.6313	13.7185	18.6262	21.1816	23.6548	23.3855	18.6904	7.29888	10.6485	12.6369	12.4843	9.07727	71.0869	70.1473	68.7923	70.1308	76.0569	2.35763	2.49657	2.8406	2.66904	1.88803	6.68429	7.38418	7.57115	7.27897	5.8283	5.61228
112	-82.728	-26.7883	-25.0349	-25.8609	-18.4765	12.0645	15.6032	17.8159	17.6313	13.7185	18.6262	21.1816	23.6548	23.3855	18.6904	7.29888	10.6485	12.6369	12.4843	9.07727	71.0869	70.1473	68.7923	70.1308	76.0569	2.35763	2.49657	2.8406	2.66904	1.88803	6.68429	7.38418	7.57115	7.27897	5.8283	5.79639
113	-72.728	-26.7883	-25.0349	-25.8609	-18.4765	12.0645	15.6032	17.8159	17.6313	13.7185	18.6262	21.1816	23.6548	23.3855	18.6904	7.29888	10.6485	12.6369	12.4843	9.07727	71.0869	70.1473	68.7923	70.1308	76.0569	2.35763	2.49657	2.8406	2.66904	1.88803	6.68429	7.38418	7.57115	7.27897	5.8283	5.98386
114	-62.728	-26.7883	-25.0349	-25.8609	-18.4765	12.0645	15.6032	17.8159	17.6313	13.7185	18.6262	21.1816	23.6548	23.3855	18.6904	7.29888	10.6485	12.6369	12.4843	9.07727	71.0869	70.1473	68.7923	70.1308	76.0569	2.35763	2.49657	2.8406	2.66904	1.88803	6.68429	7.38418	7.57115	7.27897	5.8283	6.17472
115	-52.728	-26.7883	-25.0349	-25.8609	-18.4765	12.0645	15.6032	17.8159	17.6313	13.7185	18.6262	21.1816	23.6548	23.3855	18.6904	7.29888	10.6485	12.6369	12.4843	9.07727	71.0869	70.1473	68.7923	70.1308	76.0569	2.35763	2.49657	2.8406	2.66904	1.88803	6.68429	7.38418	7.57115	7.27897	5.8283	6.36898
116	-42.728	-26.7883	-25.0349	-25.8609	-18.4765	12.0645	15.6032	17.8159	17.6313	13.7185	18.6262	21.1816	23.6548	23.3855	18.6904	7.29888	10.6485	12.6369	12.4843	9.07727	71.0869	70.1473	68.7923	70.1308	76.0569	2.35763	2.49657	2.8406	2.66904	1.88803	6.68429	7.38418	7.57115	7.27897	5.8283	6.56663
117	-32.728	-26.7883	-25.0349	-25.8609	-18.4765	12.0645	15.6032	17.8159	17.6313	13.7185	18.6262	21.1816	23.6548	23.3855	18.6904	7.29888	10.6485	12.6369	12.4843	9.07727	71.0869	70.1473	68.7923	70.1308	76.0569	2.35763	2.49657	2.8406	2.66904	1.88803	6.68429	7.38418	7.57115	7.27897	5.8283	6.76765
118	-22.728	-26.7883	-25.0349	-25.8609	-18.4765	12.0645	15.6032	17.8159	17.6313	13.7185	18.6262	21.1816	23.6548	23.3855	18.6904	7.29888	10.6485	12.6369	12.4843	9.07727	71.0869	70.1473	68.7923	70.1308	76.0569	2.35763	2.49657	2.8406	2.66904	1.88803	6.68429	7.38418	7.57115	7.27897	5.8283	6.97198
119	-12.728	-26.7883	-25.0349	-25.8609	-18.4765	12.0645	15.6032	17.8159	17.6313	13.7185	18.6262	21.1816	23.6548	23.3855	18.6904	7.29888	10.6485	12.6369	12.4843	9.07727	71.0869	70.1473	68.7923	70.1308	76.0569	2.35763	2.49657	2.8406	2.66904	1.88803	6.68429	7.38418	7.57115	7.27897	5.8283	7.17955
120	-2.72797	-26.7883	-25.0349	-25.8609	-18.4765	12.0645	15.6032	17.8159	17.6313	13.7185	18.6262	21.1816	23.6548	23.3855	18.6904	7.29888	10.6485	12.6369	12.4843	9.07727	71.0869	70.1473	68.7923	70.1308	76.0569	2.35763	2.49657	2.8406	2.66904	1.88803	6.68429	7.38418	7.57115	7.27897	5.8283	7.39026
121	7.27203	-26.7883	-25.0349	-25.8609	-18.4765	12.0645	15.6032	17.8159	17.6313	13.7185	18.6262	21.1816	23.6548	23.3855	18.6904	7.29888	10.6485	12.6369	12.4843	9.07727	71.0869	70.1473	68.7923	70.1308	76.0569	2.35763	2.49657	2.8406	2.66904	1.88803	6.68429	7.38418	7.57115	7.27897	5.8283	7.604
122	-42.728	-26.7883	-75.0349	-25.8609	-18.4765	12.0645	15.6032	17.8159	17.6313	13.7185	17.6262	21.1816	23.6548	23.3855	18.6904	7.29888	10.6485	11.6369	12.4843	9.07727	71.0869	70.1473	68.7923	70.1308	76.0569	2.35763	2.49657	2.8406	2.66904	1.88803	6.68429	7.38418	7.57115	7.27897	5.8283	6.60492
123	-42.728	-26.7883	-65.0349	-25.8609	-18.4765	12.0645	15.6032	17.8159	17.6313	13.7185	17.6262	21.1816	23.6548	23.3855	18.6904	7.29888	10.6485	11.6369	12.4843	9.07727	71.0869	70.1473	68.7923	70.1308	76.0569	2.35763	2.49657	2.8406	2.66904	1.88803	6.68429	7.38418	7.57115	7.27897	5.8283	6.54492
124	-42.728	-26.7883	-55.0349	-25.8609	-18.4765	12.0645	15.6032	17.8159	17.6313	13.7185	17.6262	21.1816	23.6548	23.3855	18.6904	7.29888	10.6485	11.6369	12.4843	9.07727	71.0869	70.1473	68.7923	70.1308	76.0569	2.35763	2.49657	2.8406	2.66904	1.88803	6.68429	7.38418	7.57115	7.27897	5.8283	6.48627
125	-42.728	-26.7883	-45.0349	-25.8609	-18.4765	12.0645	15.6032	17.8159	17.6313	13.7185	17.6262	21.1816	23.6548	23.3855	18.6904	7.29888	10.6485	11.6369	12.4843	9.07727	71.0869	70.1473	68.7923	70.1308	76.0569	2.35763	2.49657	2.8406	2.66904	1.88803	6.68429	7.38418	7.57115	7.27897	5.8283	6.42897
126	-42.728	-26.7883	-35.0349	-25.8609	-18.4765	12.0645	15.6032	17.8159	17.6313	13.7185	17.6262	21.1816	23.6548	23.3855	18.6904	7.29888	10.6485	11.6369	12.4843	9.07727	71.0869	70.1473	68.7923	70.1308	76.0569	2.35763	2.49657	2.8406	2.66904	1.88803	6.68429	7.38418	7.57115	7.27897	5.8283	6.37299
127	-42.728	-26.7883	-25.0349	-25.8609	-18.4765	12.0645	15.6032	17.8159	17.6313	13.7185	17.6262	21.1816	23.6548	23.3855	18.6904	7.29888	10.6485	11.6369	12.4843	9.07727	71.0869	70.1473	68.7923	70.1308	76.0569	2.35763	2.49657	2.8406	2.66904	1.88803	6.68429	7.38418	7.57115	7.27897	5.8283	6.31829
128	-42.728	-26.7883	-15.0349	-25.8609	-18.4765	12.0645	15.6032	17.8159	17.6313	13.7185	17.6262	21.1816	23.6548	23.3855	18.6904	7.29888	10.6485	11.6369	12.4843	9.07727	71.0869	70.1473	68.7923	70.1308	76.0569	2.35763	2.49657	2.8406	2.66904	1.88803	6.68429	7.38418	7.57115	7.27897	5.8283	6.26484
129	-42.728	-26.7883	-5.03495	-25.8609	-18.4765	12.0645	15.6032	17.8159	17.6313	13.7185	17.6262	21.1816	23.6548	23.3855	18.6904	7.29888	10.6485	11.6369	12.4843	9.07727	71.0869	70.1473	68.7923	70.1308	76.0569	2.35763	2.49657	2.8406	2.66904	1.88803	6.68429	7.38418	7.57115	7.27897	5.8283	6.21258
130	-42.728	-26.7883	4.96505	-25.8609	-18.4765	12.0645	15.6032	17.8159	17.6313	13.7185	17.6262	21.1816	23.6548	23.3855	18.6904	7.29888	10.6485	11.6369	12.4843	9.07727	71.0869	70.1473	68.7923	70.1308	76.0569	2.35763	2.49657	2.8406	2.66904	1.88803	6.68429	7.38418	7.57115	7.27897	5.8283	6.16145
131	-42.728	-26.7883	14.9651	-25.8609	-18.4765	12.0645	15.6032	17.8159	17.6313	13.7185	17.6262	21.1816	23.6548	23.3855	18.6904	7.29888	10.6485	11.6369	12.4843	9.07727	71.0869	70.1473	68.7923	70.1308	76.0569	2.35763	2.49657	2.8406	2.66904	1.88803	6.68429	7.38418	7.57115	7.27897	5.8283	6.1114
132	-42.728	-26.7883	24.9651	-25.8609	-18.4765	12.0645	15.6032	17.8159	17.6313	13.7185	17.6262	21.1816	23.6548	23.3855	18.6904	7.29888	10.6485	11.6369	12.4843	9.07727	71.0869	70.1473	68.7923	70.1308	76.0569	2.35763	2.49657	2.8406	2.66904	1.88803	6.68429	7.38418	7.57115	7.27897	5.8283	6.06235
133	-42.728	-26.7883	-75.0349	-25.8609	-18.4765	12.0645	15.6032	17.8159	17.6313	13.7185	17.6262	21.1816	23.6548	23.3855	18.6904	7.29888	10.6485	11.8369	12.4843	9.07727	71.0869	70.1473	68.7923	70.1308	76.0569	2.35763	2.49657	2.8406	2.66904	1.88803	6.68429	7.38418	7.57115	7.27897	5.8283	6.62608
134	-42.728	-26.7883	-65.0349	-25.8609	-18.4765	12.0645	15.6032	17.8159	17.6313	13.7185	17.6262	21.1816	23.6548	23.3855	18.6904	7.29888	10.6485	11.8369	12.4843	9.07727	71.0869	70.1473	68.7923	70.1308	76.0569	2.35763	2.49657	2.8406	2.66904	1.88803	6.68429	7.38418	7.57115	7.27897	5.8283	6.56481
135	-42.728	-26.7883	-55.0349	-25.8609	-18.4765	12.0645	15.6032	17.8159	17.6313	13.7185	17.6262	21.1816	23.6548	23.3855	18.6904	7.29888	10.6485	11.8369	12.4843	9.07727	71.0869	70.1473	68.7923	70.1308	76.0569	2.35763	2.49657	2.8406	2.66904	1.88803	6.68429	7.38418	7.57115	7.27897	5.8283	6.50484
136	-42.728	-26.7883	-45.0349	-25.8609	-18.4765	12.0645	15.6032	17.8159	17.6313	13.7185	17.6262	21.1816	23.6548	23.3855	18.6904	7.29888	10.6485	11.8369	12.4843	9.07727	71.0869	70.1473	68.7923	70.1308	76.0569	2.35763	2.49657	2.8406	2.66904	1.88803	6.68429	7.38418	7.57115	7.27897	5.8283	6.44617
137	-42.728	-26.7883	-35.0349	-25.8609	-18.4765	12.0645	15.6032	17.8159	17.6313	13.7185	17.6262	21.1816	23.6548	23.3855	18.6904	7.29888	10.6485	11.8369	12.4843	9.07727	71.0869	70.1473	68.7923	70.1308	76.0569	2.35763	2.49657	2.8406	2.66904	1.88803	6.68429	7.38418	7.57115	7.27897	5.8283	6.38878
138	-42.728	-26.7883	-25.0349	-25.8609	-18.4765	12.0645	15.6032	17.8159	17.6313	13.7185	17.6262	21.1816	23.6548	23.3855	18.6904	7.29888	10.6485	11.8369	12.4843	9.07727	71.0869	70.1473	68.7923	70.1308	76.0569	2.35763	2.49657	2.8406	2.66904	1.88803	6.68429	7.38418	7.57115	7.27897	5.8283	6.33264
139	-42.728	-26.7883	-15.0349	-25.8609	-18.4765	12.0645	15.6032	17.8159	17.6313	13.7185	17.6262	21.1816	23.6548	23.3855	18.6904	7.29888	10.6485	11.8369	12.4843	9.07727	71.0869	70.1473	68.7923	70.1308	76.0569	2.35763	2.49657	2.8406	2.66904	1.88803	6.68429	7.38418	7.57115	7.27897	5.8283	6.27772
140	-42.728	-26.7883	-5.03495	-25.8609	-18.4765	12.0645	15.6032	17.8159	17.6313	13.7185	17.6262	21.1816	23.6548	23.3855	18.6904	7.29888	10.6485	11.8369	12.4843	9.07727	71.0869	70.1473	68.7923	70.1308	76.0569	2.35763	2.49657	2.8406	2.66904	1.88803	6.68429	7.38418	7.57115	7.27897	5.8283	6.22395
141	-42.728	-26.7883	4.96505	-25.8609	-18.4765	12.0645	15.6032	17.8159	17.6313	13.7185	17.6262	21.1816	23.6548	23.3855	18.6904	7.29888	10.6485	11.8369	12.4843	9.07727	71.0869	70.1473	68.7923	70.1308	76.0569	2.35763	2.49657	2.8406	2.66904	1.88803	6.68429	7.38418	7.57115	7.27897	5.8283	6.17128
142	-42.728	-26.7883	14.9651	-25.8609	-18.4765	12.0645	15.6032	17.8159	17.6313	13.7185	17.6262	21.1816	23.6548	23.3855	18.6904	7.29888	10.6485	11.8369	12.4843	9.07727	71.0869	70.1473	68.7923	70.1308	76.0569	2.35763	2.49657	2.8406	2.66904	1.88803	6.68429	7.38418	7.57115	7.27897	5.8283	6.11965
143	-42.728	-26.7883	24.9651	-25.8609	-18.4765	12.0645	15.6032	17.8159	17.6313	13.7185	17.6262	21.1816	23.6548	23.3855	18.6904	7.29888	10.6485	11.8369	12.4843	9.07727	71.0869	70.1473	68.7923	70.1308	76.0569	2.35763	2.49657	2.8406	2.66904	1.88803	6.68429	7.38418	7.57115	7.27897	5.8283	6.069
144	-42.728	-26.7883	-75.0349	-25.8609	-18.4765	12.0645	15.6032	17.8159	17.6313	13.7185	17.6262	21.1816	23.6548	23.3855	18.6904	7.29888	10.6485	12.0369	12.4843	9.07727	71.0869	70.1473	68.7923	70.1308	76.0569	2.35763	2.49657	2.8406	2.66904	1.88803	6.68429	7.38418	7.57115	7.27897	5.8283	6.64821
145	-42.728	-26.7883	-65.0349	-25.8609	-18.4765	12.0645	15.6032	17.8159	17.6313	13.7185	17.6262	21.1816	23.6548	23.3855	18.6904	7.29888	10.6485	12.0369	12.4843	9.07727	71.0869	70.1473	68.7923	70.1308	76.0569	2.35763	2.49657	2.8406	2.66904	1.88803	6.68429	7.38418	7.57115	7.27897	5.8283	6.58568
146	-42.728	-26.7883	-55.0349	-25.8609	-18.4765	12.0645	15.6032	17.8159	17.6313	13.7185	17.6262	21.1816	23.6548	23.3855	18.6904	7.29888	10.6485	12.0369	12.4843	9.07727	71.0869	70.1473	68.7923	70.1308	76.0569	2.35763	2.49657	2.8406	2.66904	1.88803	6.68429	7.38418	7.57115	7.27897	5.8283	6.52441
147	-42.728	-26.7883	-45.0349	-25.8609	-18.4765	12.0645	15.6032	17.8159	17.6313	13.7185	17.6262	21.1816	23.6548	23.3855	18.6904	7.29888	10.6485	12.0369	12.4843	9.07727	71.0869	70.1473	68.7923	70.1308	76.0569	2.35763	2.49657	2.8406	2.66904	1.88803	6.68429	7.38418	7.57115	7.27897	5.8283	6.46438
148	-42.728	-26.7883	-35.0349	-25.8609	-18.4765	12.0645	15.6032	17.8159	17.6313	13.7185	17.6262	21.1816	23.6548	23.3855	18.6904	7.29888	10.6485	12.0369	12.4843	9.07727	71.0869	70.1473	68.7923	70.1308	76.0569	2.35763	2.49657	2.8406	2.66904	1.88803	6.68429	7.38418	7.57115	7.27897	5.8283	6.40559
149	-42.728	-26.7883	-25.0349	-25.8609	-18.4765	12.0645	15.6032	17.8159	17.6313	13.7185	17.6262	21.1816	23.6548	23.3855	18.6904	7.29888	10.6485	12.0369	12.4843	9.07727	71.0869	70.1473	68.7923	70.1308	76.0569	2.35763	2.49657	2.8406	2.66904	1.88803	6.68429	7.38418	7.57115	7.27897	5.8283	6.34801
150	-42.728	-26.7883	-15.0349	-25.8609	-18.4765	12.0645	15.6032	17.8159	17.6313	13.7185	17.6262	21.1816	23.6548	23.3855	18.6904	7.29888	10.6485	12.0369	12.4843	9.07727	71.0869	70.1473	68.7923	70.1308	76.0569	2.35763	2.49657	2.8406	2.66904	1.88803	6.68429	7.38418	7.57115	7.27897	5.8283	6.2916
151	-42.728	-26.7883	-5.03495	-25.8609	-18.4765	12.0645	15.6032	17.8159	17.6313	13.7185	17.6262	21.1816	23.6548	23.3855	18.6904	7.29888	10.6485	12.0369	12.4843	9.07727	71.0869	70.1473	68.7923	70.1308	76.0569	2.35763	2.49657	2.8406	2.66904	1.88803	6.68429	7.38418	7.57115	7.27897	5.8283	6.2363
152	-42.728	-26.7883	4.96505	-25.8609	-18.4765	12.0645	15.6032	17.8159	17.6313	13.7185	17.6262	21.1816	23.6548	23.3855	18.6904	7.29888	10.6485	12.0369	12.4843	9.07727	71.0869	70.1473	68.7923	70.1308	76.0569	2.35763	2.49657	2.8406	2.66904	1.88803	6.68429	7.38418	7.57115	7.27897	5.8283	6.18207
153	-42.728	-26.7883	14.9651	-25.8609	-18.4765	12.0645	15.6032	17.8159	17.6313	13.7185	17.6262	21.1816	23.6548	23.3855	18.6904	7.29888	10.6485	12.0369	12.4843	9.07727	71.0869	70.1473	68.7923	70.1308	76.0569	2.35763	2.49657	2.8406	2.66904	1.88803	6.68429	7.38418	7.57115	7.27897	5.8283	6.12885
154	-42.728	-26.7883	24.9651	-25.8609	-18.4765	12.0645	15.6032	17.8159	17.6313	13.7185	17.6262	21.1816	23.6548	23.3855	18.6904	7.29888	10.6485	12.0369	12.4843	9.07727	71.0869	70.1473	68.7923	70.1308	76.0569	2.35763	2.49657	2.8406	2.66904	1.88803	6.68429	7.38418	7.57115	7.27897	5.8283	6.07656
155	-42.728	-26.7883	-75.0349	-25.8609	-18.4765	12.0645	15.6032	17.8159	17.6313	13.7185	17.6262	21.1816	23.6548	23.3855	18.6904	7.29888	10.6485	12.2369	12.4843	9.07727	71.0869	70.1473	68.7923	70.1308	76.0569	2.35763	2.49657	2.8406	2.66904	1.88803	6.68429	7.38418	7.57115	7.27897	5.8283	6.67121
156	-42.728	-26.7883	-65.0349	-25.8609	-18.4765	12.0645	15.6032	17.8159	17.6313	13.7185	17.6262	21.1816	23.6548	23.3855	18.6904	7.29888	10.6485	12.2369	12.4843	9.07727	71.0869	70.1473	68.7923	70.1308	76.0569	2.35763	2.49657	2.8406	2.66904	1.88803	6.68429	7.38418	7.57115	7.27897	5.8283	6.60746
157	-42.728	-26.7883	-55.0349	-25.8609	-18.4765	12.0645	15.6032	17.8159	17.6313	13.7185	17.6262	21.1816	23.6548	23.3855	18.6904	7.29888	10.6485	12.2369	12.4843	9.07727	71.0869	70.1473	68.7923	70.1308	76.0569	2.35763	2.49657	2.8406	2.66904	1.88803	6.68429	7.38418	7.57115	7.27897	5.8283	6.5449
158	-42.728	-26.7883	-45.0349	-25.8609	-18.4765	12.0645	15.6032	17.8159	17.6313	13.7185	17.6262	21.1816	23.6548	23.3855	18.6904	7.29888	10.6485	12.2369	12.4843	9.07727	71.0869	70.1473	68.7923	70.1308	76.0569	2.35763	2.49657	2.8406	2.66904	1.88803	6.68429	7.38418	7.57115	7.27897	5.8283	6.48354
159	-42.728	-26.7883	-35.0349	-25.8609	-18.4765	12.0645	15.6032	17.8159	17.6313	13.7185	17.6262	21.1816	23.6548	23.3855	18.6904	7.29888	10.6485	12.2369	12.4843	9.07727	71.0869	70.1473	68.7923	70.1308	76.0569	2.35763	2.49657	2.8406	2.66904	1.88803	6.68429	7.38418	7.57115	7.27897	5.8283	6.42336
160	-42.728	-26.7883	-25.0349	-25.8609	-18.4765	12.0645	15.6032	17.8159	17.6313	13.7185	17.6262	21.1816	23.6548	23.3855	18.6904	7.29888	10.6485	12.2369	12.4843	9.07727	71.0869	70.1473	68.7923	70.1308	76.0569	2.35763	2.49657	2.8406	2.66904	1.88803	6.68429	7.38418	7.57115	7.27897	5.8283	6.36434
161	-42.728	-26.7883	-15.0349	-25.8609	-18.4765	12.0645	15.6032	17.8159	17.6313	13.7185	17.6262	21.1816	23.6548	23.3855	18.6904	7.29888	10.6485	12.2369	12.4843	9.07727	71.0869	70.1473	68.7923	70.1308	76.0569	2.35763	2.49657	2.8406	2.66904	1.88803	6.68429	7.38418	7.57115	7.27897	5.8283	6.30643
162	-42.728	-26.7883	-5.03495	-25.8609	-18.4765	12.0645	15.6032	17.8159	17.6313	13.7185	17.6262	21.1816	23.6548	23.3855	18.6904	7.29888	10.6485	12.2369	12.4843	9.07727	71.0869	70.1473	68.7923	70.1308	76.0569	2.35763	2.49657	2.8406	2.66904	1.88803	6.68429	7.38418	7.57115	7.27897	5.8283	6.2496
163	-42.728	-26.7883	4.96505	-25.8609	-18.4765	12.0645	15.6032	17.8159	17.6313	13.7185	17.6262	21.1816	23.6548	23.3855	18.6904	7.29888	10.6485	12.2369	12.4843	9.07727	71.0869	70.1473	68.7923	70.1308	76.0569	2.35763	2.49657	2.8406	2.66904	1.88803	6.68429	7.38418	7.57115	7.27897	5.8283	6.19379
164	-42.728	-26.7883	14.9651	-25.8609	-18.4765	12.0645	15.6032	17.8159	17.6313	13.7185	17.6262	21.1816	23.6548	23.3855	18.6904	7.29888	10.6485	12.2369	12.4843	9.07727	71.0869	70.1473	68.7923	70.1308	76.0569	2.35763	2.49657	2.8406	2.66904	1.88803	6.68429	7.38418	7.57115	7.27897	5.8283	6.13894
165	-42.728	-26.7883	24.9651	-25.8609	-18.4765	12.0645	15.6032	17.8159	17.6313	13.7185	17.6262	21.1816	23.6548	23.3855	18.6904	7.29888	10.6485	12.2369	12.4843	9.07727	71.0869	70.1473	68.7923	70.1308	76.0569	2.35763	2.49657	2.8406	2.66904	1.88803	6.68429	7.38418	7.57115	7.27897	5.8283	6.08499
166	-42.728	-26.7883	-75.0349	-25.8609	-18.4765	12.0645	15.6032	17.8159	17.6313	13.7185	17.6262	21.1816	23.6548	23.3855	18.6904	7.29888	10.6485	12.4369	12.4843	9.07727	71.0869	70.1473	68.7923	70.1308	76.0569	2.35763	2.49657	2.8406	2.66904	1.88803	6.68429	7.38418	7.57115	7.27897	5.8283	6.69501
167	-42.728	-26.7883	-65.0349	-25.8609	-18.4765	12.0645	15.6032	17.8159	17.6313	13.7185	17.6262	21.1816	23.6548	23.3855	18.6904	7.29888	10.6485	12.4369	12.4843	9.07727	71.0869	70.1473	68.7923	70.1308	76.0569	2.35763	2.49657	2.8406	2.66904	1.88803	6.68429	7.38418	7.57115	7.27897	5.8283	6.63006
168	-42.728	-26.7883	-55.0349	-25.8609	-18.4765	12.0645	15.6032	17.8159	17.6313	13.7185	17.6262	21.1816	23.6548	23.3855	18.6904	7.29888	10.6485	12.4369	12.4843	9.07727	71.0869	70.1473	68.7923	70.1308	76.0569	2.35763	2.49657	2.8406	2.66904	1.88803	6.68429	7.38418	7.57115	7.27897	5.8283	6.56625
169	-42.728	-26.7883	-45.0349	-25.8609	-18.4765	12.0645	15.6032	17.8159	17.6313	13.7185	17.6262	21.1816	23.6548	23.3855	18.6904	7.29888	10.6485	12.4369	12.4843	9.07727	71.0869	70.1473	68.7923	70.1308	76.0569	2.35763	2.49657	2.8406	2.66904	1.88803	6.68429	7.38418	7.57115	7.27897	5.8283	6.50357
170	-42.728	-26.7883	-35.0349	-25.8609	-18.4765	12.0645	15.6032	17.8159	17.6313	13.7185	17.6262	21.1816	23.6548	23.3855	18.6904	7.29888	10.6485	12.4369	12.4843	9.07727	71.0869	70.1473	68.7923	70.1308	76.0569	2.35763	2.49657	2.8406	2.66904	1.88803	6.68429	7.38418	7.57115	7.27897	5.8283	6.44202
171	-42.728	-26.7883	-25.0349	-25.8609	-18.4765	12.0645	15.6032	17.8159	17.6313	13.7185	17.6262	21.1816	23.6548	23.3855	18.6904	7.29888	10.6485	12.4369	12.4843	9.07727	71.0869	70.1473	68.7923	70.1308	76.0569	2.35763	2.49657	2.8406	2.66904	1.88803	6.68429	7.38418	7.57115	7.27897	5.8283	6.38156
172	-42.728	-26.7883	-15.0349	-25.8609	-18.4765	12.0645	15.6032	17.8159	17.6313	13.7185	17.6262	21.1816	23.6548	23.3855	18.6904	7.29888	10.6485	12.4369	12.4843	9.07727	71.0869	70.1473	68.7923	70.1308	76.0569	2.35763	2.49657	2.8406	2.66904	1.88803	6.68429	7.38418	7.57115	7.27897	5.8283	6.32216
173	-42.728	-26.7883	-5.03495	-25.8609	-18.4765	12.0645	15.6032	17.8159	17.6313	13.7185	17.6262	21.1816	23.6548	23.3855	18.6904	7.29888	10.6485	12.4369	12.4843	9.07727	71.0869	70.1473	68.7923	70.1308	76.0569	2.35763	2.49657	2.8406	2.66904	1.88803	6.68429	7.38418	7.57115	7.27897	5.8283	6.26379
174	-42.728	-26.7883	4.96505	-25.8609	-18.4765	12.0645	15.6032	17.8159	17.6313	13.7185	17.6262	21.1816	23.6548	23.3855	18.6904	7.29888	10.6485	12.4369	12.4843	9.07727	71.0869	70.1473	68.7923	70.1308	76.0569	2.35763	2.49657	2.8406	2.66904	1.88803	6.68429	7.38418	7.57115	7.27897	5.8283	6.20638
175	-42.728	-26.7883	14.9651	-25.8609	-18.4765	12.0645	15.6032	17.8159	17.6313	13.7185	17.6262	21.1816	23.6548	23.3855	18.6904	7.29888	10.6485	12.4369	12.4843	9.07727	71.0869	70.1473	68.7923	70.1308	76.0569	2.35763	2.49657	2.8406	2.66904	1.88803	6.68429	7.38418	7.57115	7.27897	5.8283	6.1499
176	-42.728	-26.7883	24.9651	-25.8609	-18.4765	12.0645	15.6032	17.8159	17.6313	13.7185	17.6262	21.1816	23.6548	23.3855	18.6904	7.29888	10.6485	12.4369	12.4843	9.07727	71.0869	70.1473	68.7923	70.1308	76.0569	2.35763	2.49657	2.8406	2.66904	1.88803	6.68429	7.38418	7.57115	7.27897	5.8283	6.09427
177	-42.728	-26.7883	-75.0349	-25.8609	-18.4765	12.0645	15.6032	17.8159	17.6313	13.7185	17.6262	21.1816	23.6548	23.3855	18.6904	7.29888	10.6485	12.6369	12.4843	9.07727	71.0869	70.1473	68.7923	70.1308	76.0569	2.35763	2.49657	2.8406	2.66904	1.88803	6.68429	7.38418	7.57115	7.27897	5.8283	6.71951
178	-42.728	-26.7883	-65.0349	-25.8609	-18.4765	12.0645	15.6032	17.8159	17.6313	13.7185	17.6262	21.1816	23.6548	23.3855	18.6904	7.29888	10.6485	12.6369	12.4843	9.07727	71.0869	70.1473	68.7923	70.1308	76.0569	2.35763	2.49657	2.8406	2.66904	1.88803	6.68429	7.38418	7.57115	7.27897	5.8283	6.65341
179	-42.728	-26.7883	-55.0349	-25.8609	-18.4765	12.0645	15.6032	17.8159	17.6313	13.7185	17.6262	21.1816	23.6548	23.3855	18.6904	7.29888	10.6485	12.6369	12.4843	9.07727	71.0869	70.1473	68.7923	70.1308	76.0569	2.35763	2.49657	2.8406	2.66904	1.88803	6.68429	7.38418	7.57115	7.27897	5.8283	6.58838
180	-42.728	-26.7883	-45.0349	-25.8609	-18.4765	12.0645	15.6032	17.8159	17.6313	13.7185	17.6262	21.1816	23.6548	23.3855	18.6904	7.29888	10.6485	12.6369	12.4843	9.07727	71.0869	70.1473	68.7923	70.1308	76.0569	2.35763	2.49657	2.8406	2.66904	1.88803	6.68429	7.38418	7.57115	7.27897	5.8283	6.52441
181	-42.728	-26.7883	-35.0349	-25.8609	-18.4765	12.0645	15.6032	17.8159	17.6313	13.7185	17.6262	21.1816	23.6548	23.3855	18.6904	7.29888	10.6485	12.6369	12.4843	9.07727	71.0869	70.1473	68.7923	70.1308	76.0569	2.35763	2.49657	2.8406	2.66904	1.88803	6.68429	7.38418	7.57115	7.27897	5.8283	6.46149
182	-42.728	-26.7883	-25.0349	-25.8609	-18.4765	12.0645	15.6032	17.8159	17.6313	13.7185	17.6262	21.1816	23.6548	23.3855	18.6904	7.29888	10.6485	12.6369	12.4843	9.07727	71.0869	70.1473	68.7923	70.1308	76.0569	2.35763	2.49657	2.8406	2.66904	1.88803	6.68429	7.38418	7.57115	7.27897	5.8283	6.39961
183	-42.728	-26.7883	-15.0349	-25.8609	-18.4765	12.0645	15.6032	17.8159	17.6313	13.7185	17.6262	21.1816	23.6548	23.3855	18.6904	7.29888	10.6485	12.6369	12.4843	9.07727	71.0869	70.1473	68.7923	70.1308	76.0569	2.35763	2.49657	2.8406	2.66904	1.88803	6.68429	7.38418	7.57115	7.27897	5.8283	6.33873
184	-42.728	-26.7883	-5.03495	-25.8609	-18.4765	12.0645	15.6032	17.8159	17.6313	13.7185	17.6262	21.1816	23.6548	23.3855	18.6904	7.29888	10.6485	12.6369	12.4843	9.07727	71.0869	70.1473	68.7923	70.1308	76.0569	2.35763	2.49657	2.8406	2.66904	1.88803	6.68429	7.38418	7.57115	7.27897	5.8283	6.27882
185	-42.728	-26.7883	4.96505	-25.8609	-18.4765	12.0645	15.6032	17.8159	17.6313	13.7185	17.6262	21.1816	23.6548	23.3855	18.6904	7.29888	10.6485	12.6369	12.4843	9.07727	71.0869	70.1473	68.7923	70.1308	76.0569	2.35763	2.49657	2.8406	2.66904	1.88803	6.68429	7.38418	7.57115	7.27897	5.8283	6.21982
186	-42.728	-26.7883	14.9651	-25.8609	-18.4765	12.0645	15.6032	17.8159	17.6313	13.7185	17.6262	21.1816	23.6548	23.3855	18.6904	7.29888	10.6485	12.6369	12.4843	9.07727	71.0869	70.1473	68.7923	70.1308	76.0569	2.35763	2.49657	2.8406	2.66904	1.88803	6.68429	7.38418	7.57115	7.27897	5.8283	6.16168
187	-42.728	-26.7883	24.9651	-25.8609	-18.4765	12.0645	15.6032	17.8159	17.6313	13.7185	17.6262	21.1816	23.6548	23.3855	18.6904	7.29888	10.6485	12.6369	12.4843	9.07727	71.0869	70.1473	68.7923	70.1308	76.0569	2.35763	2.49657	2.8406	2.66904	1.88803	6.68429	7.38418	7.57115	7.27897	5.8283	6.10436
188	-42.728	-26.7883	-75.0349	-25.8609	-18.4765	12.0645	15.6032	17.8159	17.6313	13.7185	17.6262	21.1816	23.6548	23.3855	18.6904	7.29888	10.6485	12.8369	12.4843	9.07727	71.0869	70.1473	68.7923	70.1308	76.0569	2.35763	2.49657	2.8406	2.66904	1.88803	6.68429	7.38418	7.57115	7.27897	5.8283	6.74462
189	-42.728	-26.7883	-65.0349	-25.8609	-18.4765	12.0645	15.6032	17.8159	17.6313	13.7185	17.6262	21.1816	23.6548	23.3855	18.6904	7.29888	10.6485	12.8369	12.4843	9.07727	71.0869	70.1473	68.7923	70.1308	76.0569	2.35763	2.49657	2.8406	2.66904	1.88803	6.68429	7.38418	7.57115	7.27897	5.8283	6.67742
190	-42.728	-26.7883	-55.0349	-25.8609	-18.4765	12.0645	15.6032	17.8159	17.6313	13.7185	17.6262	21.1816	23.6548	23.3855	18.6904	7.29888	10.6485	12.8369	12.4843	9.07727	71.0869	70.1473	68.7923	70.1308	76.0569	2.35763	2.49657	2.8406	2.66904	1.88803	6.68429	7.38418	7.57115	7.27897	5.8283	6.6112
191	-42.728	-26.7883	-45.0349	-25.8609	-18.4765	12.0645	15.6032	17.8159	17.6313	13.7185	17.6262	21.1816	23.6548	23.3855	18.6904	7.29888	10.6485	12.8369	12.4843	9.07727	71.0869	70.1473	68.7923	70.1308	76.0569	2.35763	2.49657	2.8406	2.66904	1.88803	6.68429	7.38418	7.57115	7.27897	5.8283	6.54597
192	-42.728	-26.7883	-35.0349	-25.8609	-18.4765	12.0645	15.6032	17.8159	17.6313	13.7185	17.6262	21.1816	23.6548	23.3855	18.6904	7.29888	10.6485	12.8369	12.4843	9.07727	71.0869	70.1473	68.7923	70.1308	76.0569	2.35763	2.49657	2.8406	2.66904	1.88803	6.68429	7.38418	7.57115	7.27897	5.8283	6.48172
193	-42.728	-26.7883	-25.0349	-25.8609	-18.4765	12.0645	15.6032	17.8159	17.6313	13.7185	17.6262	21.1816	23.6548	23.3855	18.6904	7.29888	10.6485	12.8369	12.4843	9.07727	71.0869	70.1473	68.7923	70.1308	76.0569	2.35763	2.49657	2.8406	2.66904	1.88803	6.68429	7.38418	7.57115	7.27897	5.8283	6.41844
194	-42.728	-26.7883	-15.0349	-25.8609	-18.4765	12.0645	15.6032	17.8159	17.6313	13.7185	17.6262	21.1816	23.6548	23.3855	18.6904	7.29888	10.6485	12.8369	12.4843	9.07727	71.0869	70.1473	68.7923	70.1308	76.0569	2.35763	2.49657	2.8406	2.66904	1.88803	6.68429	7.38418	7.57115	7.27897	5.8283	6.35609
195	-42.728	-26.7883	-5.03495	-25.8609	-18.4765	12.0645	15.6032	17.8159	17.6313	13.7185	17.6262	21.1816	23.6548	23.3855	18.6904	7.29888	10.6485	12.8369	12.4843	9.07727	71.0869	70.1473	68.7923	70.1308	76.0569	2.35763	2.49657	2.8406	2.66904	1.88803	6.68429	7.38418	7.57115	7.27897	5.8283	6.29464
196	-42.728	-26.7883	4.96505	-25.8609	-18.4765	12.0645	15.6032	17.8159	17.6313	13.7185	17.6262	21.1816	23.6548	23.3855	18.6904	7.29888	10.6485	12.8369	12.4843	9.07727	71.0869	70.1473	68.7923	70.1308	76.0569	2.35763	2.49657	2.8406	2.66904	1.88803	6.68429	7.38418	7.57115	7.27897	5.8283	6.23404
197	-42.728	-26.7883	14.9651	-25.8609	-18.4765	12.0645	15.6032	17.8159	17.6313	13.7185	17.6262	21.1816	23.6548	23.3855	18.6904	7.29888	10.6485	12.8369	12.4843	9.07727	71.0869	70.1473	68.7923	70.1308	76.0569	2.35763	2.49657	2.8406	2.66904	1.88803	6.68429	7.38418	7.57115	7.27897	5.8283	6.17426
198	-42.728	-26.7883	24.9651	-25.8609	-18.4765	12.0645	15.6032	17.8159	17.6313	13.7185	17.6262	21.1816	23.6548	23.3855	18.6904	7.29888	10.6485	12.8369	12.4843	9.07727	71.0869	70.1473	68.7923	70.1308	76.0569	2.35763	2.49657	2.8406	2.66904	1.88803	6.68429	7.38418	7.57115	7.27897	5.8283	6.11522
199	-42.728	-26.7883	-75.0349	-25.8609	-18.4765	12.0645	15.6032	17.8159	17.6313	13.7185	17.6262	21.1816	23.6548	23.3855	18.6904	7.29888	10.6485	13.0369	12.4843	9.07727	71.0869	70.1473	68.7923	70.1308	76.0569	2.35763	2.49657	2.8406	2.66904	1.88803	6.68429	7.38418	7.57115	7.27897	5.8283	6.77026
200	-42.728	-26.7883	-65.0349	-25.8609	-18.4765	12.0645	15.6032	17.8159	17.6313	13.7185	17.6262	21.1816	23.6548	23.3855	18.6904	7.29888	10.6485	13.0369	12.4843	9.07727	71.0869	70.1473	68.7923	70.1308	76.0569	2.35763	2.49657	2.8406	2.66904	1.88803	6.68429	7.38418	7.57115	7.27897	5.8283	6.702
201	-42.728	-26.7883	-55.0349	-25.8609	-18.4765	12.0645	15.6032	17.8159	17.6313	13.7185	17.6262	21.1816	23.6548	23.3855	18.6904	7.29888	10.6485	13.0369	12.4843	9.07727	71.0869	70.1473	68.7923	70.1308	76.0569	2.35763	2.49657	2.8406	2.66904	1.88803	6.68429	7.38418	7.57115	7.27897	5.8283	6.63463
202	-42.728	-26.7883	-45.0349	-25.8609	-18.4765	12.0645	15.6032	17.8159	17.6313	13.7185	17.6262	21.1816	23.6548	23.3855	18.6904	7.29888	10.6485	13.0369	12.4843	9.07727	71.0869	70.1473	68.7923	70.1308	76.0569	2.35763	2.49657	2.8406	2.66904	1.88803	6.68429	7.38418	7.57115	7.27897	5.8283	6.56818
203	-42.728	-26.7883	-35.0349	-25.8609	-18.4765	12.0645	15.6032	17.8159	17.6313	13.7185	17.6262	21.1816	23.6548	23.3855	18.6904	7.29888	10.6485	13.0369	12.4843	9.07727	71.0869	70.1473	68.7923	70.1308	76.0569	2.35763	2.49657	2.8406	2.66904	1.88803	6.68429	7.38418	7.57115	7.27897	5.8283	6.50263
204	-42.728	-26.7883	-25.0349	-25.8609	-18.4765	12.0645	15.6032	17.8159	17.6313	13.7185	17.6262	21.1816	23.6548	23.3855	18.6904	7.29888	10.6485	13.0369	12.4843	9.07727	71.0869	70.1473	68.7923	70.1308	76.0569	2.35763	2.49657	2.8406	2.66904	1.88803	6.68429	7.38418	7.57115	7.27897	5.8283	6.43797
205	-42.728	-26.7883	-15.0349	-25.8609	-18.4765	12.0645	15.6032	17.8159	17.6313	13.7185	17.6262	21.1816	23.6548	23.3855	18.6904	7.29888	10.6485	13.0369	12.4843	9.07727	71.0869	70.1473	68.7923	70.1308	76.0569	2.35763	2.49657	2.8406	2.66904	1.88803	6.68429	7.38418	7.57115	7.27897	5.8283	6.37417
206	-42.728	-26.7883	-5.03495	-25.8609	-18.4765	12.0645	15.6032	17.8159	17.6313	13.7185	17.6262	21.1816	23.6548	23.3855	18.6904	7.29888	10.6485	13.0369	12.4843	9.07727	71.0869	70.1473	68.7923	70.1308	76.0569	2.35763	2.49657	2.8406	2.66904	1.88803	6.68429	7.38418	7.57115	7.27897	5.8283	6.3112
207	-42.728	-26.7883	4.96505	-25.8609	-18.4765	12.0645	15.6032	17.8159	17.6313	13.7185	17.6262	21.1816	23.6548	23.3855	18.6904	7.29888	10.6485	13.0369	12.4843	9.07727	71.0869	70.1473	68.7923	70.1308	76.0569	2.35763	2.49657	2.8406	2.66904	1.88803	6.68429	7.38418	7.57115	7.27897	5.8283	6.24902
208	-42.728	-26.7883	14.9651	-25.8609	-18.4765	12.0645	15.6032	17.8159	17.6313	13.7185	17.6262	21.1816	23.6548	23.3855	18.6904	7.29888	10.6485	13.0369	12.4843	9.07727	71.0869	70.1473	68.7923	70.1308	76.0569	2.35763	2.49657	2.8406	2.66904	1.88803	6.68429	7.38418	7.57115	7.27897	5.8283	6.18758
209	-42.728	-26.7883	24.9651	-25.8609	-18.4765	12.0645	15.6032	17.8159	17.6313	13.7185	17.6262	21.1816	23.6548	23.3855	18.6904	7.29888	10.6485	13.0369	12.4843	9.07727	71.0869	70.1473	68.7923	70.1308	76.0569	2.35763	2.49657	2.8406	2.66904	1.88803	6.68429	7.38418	7.57115	7.27897	5.8283	6.12683
210	-42.728	-26.7883	-75.0349	-25.8609	-18.4765	12.0645	15.6032	17.8159	17.6313	13.7185	17.6262	21.1816	23.6548	23.3855	18.6904	7.29888	10.6485	13.2369	12.4843	9.07727	71.0869	70.1473	68.7923	70.1308	76.0569	2.35763	2.49657	2.8406	2.66904	1.88803	6.68429	7.38418	7.57115	7.27897	5.8283	6.79634
211	-42.728	-26.7883	-65.0349	-25.8609	-18.4765	12.0645	15.6032	17.8159	17.6313	13.7185	17.6262	21.1816	23.6548	23.3855	18.6904	7.29888	10.6485	13.2369	12.4843	9.07727	71.0869	70.1473	68.7923	70.1308	76.0569	2.35763	2.49657	2.8406	2.66904	1.88803	6.68429	7.38418	7.57115	7.27897	5.8283	6.72706
212	-42.728	-26.7883	-55.0349	-25.8609	-18.4765	12.0645	15.6032	17.8159	17.6313	13.7185	17.6262	21.1816	23.6548	23.3855	18.6904	7.29888	10.6485	13.2369	12.4843	9.07727	71.0869	70.1473	68.7923	70.1308	76.0569	2.35763	2.49657	2.8406	2.66904	1.88803	6.68429	7.38418	7.57115	7.27897	5.8283	6.6586
213	-42.728	-26.7883	-45.0349	-25.8609	-18.4765	12.0645	15.6032	17.8159	17.6313	13.7185	17.6262	21.1816	23.6548	23.3855	18.6904	7.29888	10.6485	13.2369	12.4843	9.07727	71.0869	70.1473	68.7923	70.1308	76.0569	2.35763	2.49657	2.8406	2.66904	1.88803	6.68429	7.38418	7.57115	7.27897	5.8283	6.59096
214	-42.728	-26.7883	-35.0349	-25.8609	-18.4765	12.0645	15.6032	17.8159	17.6313	13.7185	17.6262	21.1816	23.6548	23.3855	18.6904	7.29888	10.6485	13.2369	12.4843	9.07727	71.0869	70.1473	68.7923	70.1308	76.0569	2.35763	2.49657	2.8406	2.66904	1.88803	6.68429	7.38418	7.57115	7.27897	5.8283	6.52415
215	-42.728	-26.7883	-25.0349	-25.8609	-18.4765	12.0645	15.6032	17.8159	17.6313	13.7185	17.6262	21.1816	23.6548	23.3855	18.6904	7.29888	10.6485	13.2369	12.4843	9.07727	71.0869	70.1473	68.7923	70.1308	76.0569	2.35763	2.49657	2.8406	2.66904	1.88803	6.68429	7.38418	7.57115	7.27897	5.8283	6.45814
216	-42.728	-26.7883	-15.0349	-25.8609	-18.4765	12.0645	15.6032	17.8159	17.6313	13.7185	17.6262	21.1816	23.6548	23.3855	18.6904	7.29888	10.6485	13.2369	12.4843	9.07727	71.0869	70.1473	68.7923	70.1308	76.0569	2.35763	2.49657	2.8406	2.66904	1.88803	6.68429	7.38418	7.57115	7.27897	5.8283	6.39292
217	-42.728	-26.7883	-5.03495	-25.8609	-18.4765	12.0645	15.6032	17.8159	17.6313	13.7185	17.6262	21.1816	23.6548	23.3855	18.6904	7.29888	10.6485	13.2369	12.4843	9.07727	71.0869	70.1473	68.7923	70.1308	76.0569	2.35763	2.49657	2.8406	2.66904	1.88803	6.68429	7.38418	7.57115	7.27897	5.8283	6.32844
218	-42.728	-26.7883	4.96505	-25.8609	-18.4765	12.0645	15.6032	17.8159	17.6313	13.7185	17.6262	21.1816	23.6548	23.3855	18.6904	7.29888	10.6485	13.2369	12.4843	9.07727	71.0869	70.1473	68.7923	70.1308	76.0569	2.35763	2.49657	2.8406	2.66904	1.88803	6.68429	7.38418	7.57115	7.27897	5.8283	6.26468
219	-42.728	-26.7883	14.9651	-25.8609	-18.4765	12.0645	15.6032	17.8159	17.6313	13.7185	17.6262	21.1816	23.6548	23.3855	18.6904	7.29888	10.6485	13.2369	12.4843	9.07727	71.0869	70.1473	68.7923	70.1308	76.0569	2.35763	2.49657	2.8406	2.66904	1.88803	6.68429	7.38418	7.57115	7.27897	5.8283	6.2016
220	-42.728	-26.7883	24.9651	-25.8609	-18.4765	12.0645	15.6032	17.8159	17.6313	13.7185	17.6262	21.1816	23.6548	23.3855	18.6904	7.29888	10.6485	13.2369	12.4843	9.07727	71.0869	70.1473	68.7923	70.1308	76.0569	2.35763	2.49657	2.8406	2.66904	1.88803	6.68429	7.38418	7.57115	7.27897	5.8283	6.13915
221	-42.728	-26.7883	-75.0349	-25.8609	-18.4765	12.0645	15.6032	17.8159	17.6313	13.7185	17.6262	21.1816	23.6548	23.3855	18.6904	7.29888	10.6485	13.4369	12.4843	9.07727	71.0869	70.1473	68.7923	70.1308	76.0569	2.35763	2.49657	2.8406	2.66904	1.88803	6.68429	7.38418	7.57115	7.27897	5.8283	6.82275
222	-42.728	-26.7883	-65.0349	-25.8609	-18.4765	12.0645	15.6032	17.8159	17.6313	13.7185	17.6262	21.1816	23.6548	23.3855	18.6904	7.29888	10.6485	13.4369	12.4843	9.07727	71.0869	70.1473	68.7923	70.1308	76.0569	2.35763	2.49657	2.8406	2.66904	1.88803	6.68429	7.38418	7.57115	7.27897	5.8283	6.75252
223	-42.728	-26.7883	-55.0349	-25.8609	-18.4765	12.0645	15.6032	17.8159	17.6313	13.7185	17.6262	21.1816	23.6548	23.3855	18.6904	7.29888	10.6485	13.4369	12.4843	9.07727	71.0869	70.1473	68.7923	70.1308	76.0569	2.35763	2.49657	2.8406	2.66904	1.88803	6.68429	7.38418	7.57115	7.27897	5.8283	6.68301
224	-42.728	-26.7883	-45.0349	-25.8609	-18.4765	12.0645	15.6032	17.8159	17.6313	13.7185	17.6262	21.1816	23.6548	23.3855	18.6904	7.29888	10.6485	13.4369	12.4843	9.07727	71.0869	70.1473	68.7923	70.1308	76.0569	2.35763	2.49657	2.8406	2.66904	1.88803	6.68429	7.38418	7.57115	7.27897	5.8283	6.61424
225	-42.728	-26.7883	-35.0349	-25.8609	-18.4765	12.0645	15.6032	17.8159	17.6313	13.7185	17.6262	21.1816	23.6548	23.3855	18.6904	7.29888	10.6485	13.4369	12.4843	9.07727	71.0869	70.1473	68.7923	70.1308	76.0569	2.35763	2.49657	2.8406	2.66904	1.88803	6.68429	7.38418	7.57115	7.27897	5.8283	6.5462
226	-42.728	-26.7883	-25.0349	-25.8609	-18.4765	12.0645	15.6032	17.8159	17.6313	13.7185	17.6262	21.1816	23.6548	23.3855	18.6904	7.29888	10.6485	13.4369	12.4843	9.07727	71.0869	70.1473	68.7923	70.1308	76.0569	2.35763	2.49657	2.8406	2.66904	1.88803	6.68429	7.38418	7.57115	7.27897	5.8283	6.47888
227	-42.728	-26.7883	-15.0349	-25.8609	-18.4765	12.0645	15.6032	17.8159	17.6313	13.7185	17.6262	21.1816	23.6548	23.3855	18.6904	7.29888	10.6485	13.4369	12.4843	9.07727	71.0869	70.1473	68.7923	70.1308	76.0569	2.35763	2.49657	2.8406	2.66904	1.88803	6.68429	7.38418	7.57115	7.27897	5.8283	6.41226
228	-42.728	-26.7883	-5.03495	-25.8609	-18.4765	12.0645	15.6032	17.8159	17.6313	13.7185	17.6262	21.1816	23.6548	23.3855	18.6904	7.29888	10.6485	13.4369	12.4843	9.07727	71.0869	70.1473	68.7923	70.1308	76.0569	2.35763	2.49657	2.8406	2.66904	1.88803	6.68429	7.38418	7.57115	7.27897	5.8283	6.34631
229	-42.728	-26.7883	4.96505	-25.8609	-18.4765	12.0645	15.6032	17.8159	17.6313	13.7185	17.6262	21.1816	23.6548	23.3855	18.6904	7.29888	10.6485	13.4369	12.4843	9.07727	71.0869	70.1473	68.7923	70.1308	76.0569	2.35763	2.49657	2.8406	2.66904	1.88803	6.68429	7.38418	7.57115	7.27897	5.8283	6.28099
230	-42.728	-26.7883	14.9651	-25.8609	-18.4765	12.0645	15.6032	17.8159	17.6313	13.7185	17.6262	21.1816	23.6548	23.3855	18.6904	7.29888	10.6485	13.4369	12.4843	9.07727	71.0869	70.1473	68.7923	70.1308	76.0569	2.35763	2.49657	2.8406	2.66904	1.88803	6.68429	7.38418	7.57115	7.27897	5.8283	6.21628
231	-42.728	-26.7883	24.9651	-25.8609	-18.4765	12.0645	15.6032	17.8159	17.6313	13.7185	17.6262	21.1816	23.6548	23.3855	18.6904	7.29888	10.6485	13.4369	12.4843	9.07727	71.0869	70.1473	68.7923	70.1308	76.0569	2.35763	2.49657	2.8406	2.66904	1.88803	6.68429	7.38418	7.57115	7.27897	5.8283	6.15214
232	-42.728	-26.7883	-75.0349	-25.8609	-18.4765	12.0645	15.6032	17.8159	17.6313	13.7185	17.6262	21.1816	23.6548	23.3855	18.6904	7.29888	10.6485	13.6369	12.4843	9.07727	71.0869	70.1473	68.7923	70.1308	76.0569	2.35763	2.49657	2.8406	2.66904	1.88803	6.68429	7.38418	7.57115	7.27897	5.8283	6.8494
233	-42.728	-26.7883	-65.0349	-25.8609	-18.4765	12.0645	15.6032	17.8159	17.6313	13.7185	17.6262	21.1816	23.6548	23.3855	18.6904	7.29888	10.6485	13.6369	12.4843	9.07727	71.0869	70.1473	68.7923	70.1308	76.0569	2.35763	2.49657	2.8406	2.66904	1.88803	6.68429	7.38418	7.57115	7.27897	5.8283	6.77828
234	-42.728	-26.7883	-55.0349	-25.8609	-18.4765	12.0645	15.6032	17.8159	17.6313	13.7185	17.6262	21.1816	23.6548	23.3855	18.6904	7.29888	10.6485	13.6369	12.4843	9.07727	71.0869	70.1473	68.7923	70.1308	76.0569	2.35763	2.49657	2.8406	2.66904	1.88803	6.68429	7.38418	7.57115	7.27897	5.8283	6.70778
235	-42.728	-26.7883	-45.0349	-25.8609	-18.4765	12.0645	15.6032	17.8159	17.6313	13.7185	17.6262	21.1816	23.6548	23.3855	18.6904	7.29888	10.6485	13.6369	12.4843	9.07727	71.0869	70.1473	68.7923	70.1308	76.0569	2.35763	2.49657	2.8406	2.66904	1.88803	6.68429	7.38418	7.57115	7.27897	5.8283	6.63793
236	-42.728	-26.7883	-35.0349	-25.8609	-18.4765	12.0645	15.6032	17.8159	17.6313	13.7185	17.6262	21.1816	23.6548	23.3855	18.6904	7.29888	10.6485	13.6369	12.4843	9.07727	71.0869	70.1473	68.7923	70.1308	76.0569	2.35763	2.49657	2.8406	2.66904	1.88803	6.68429	7.38418	7.57115	7.27897	5.8283	6.56871
237	-42.728	-26.7883	-25.0349	-25.8609	-18.4765	12.0645	15.6032	17.8159	17.6313	13.7185	17.6262	21.1816	23.6548	23.3855	18.6904	7.29888	10.6485	13.6369	12.4843	9.07727	71.0869	70.1473	68.7923	70.1308	76.0569	2.35763	2.49657	2.8406	2.66904	1.88803	6.68429	7.38418	7.57115	7.27897	5.8283	6.50012
238	-42.728	-26.7883	-15.0349	-25.8609	-18.4765	12.0645	15.6032	17.8159	17.6313	13.7185	17.6262	21.1816	23.6548	23.3855	18.6904	7.29888	10.6485	13.6369	12.4843	9.07727	71.0869	70.1473	68.7923	70.1308	76.0569	2.35763	2.49657	2.8406	2.66904	1.88803	6.68429	7.38418	7.57115	7.27897	5.8283	6.43214
239	-42.728	-26.7883	-5.03495	-25.8609	-18.4765	12.0645	15.6032	17.8159	17.6313	13.7185	17.6262	21.1816	23.6548	23.3855	18.6904	7.29888	10.6485	13.6369	12.4843	9.07727	71.0869	70.1473	68.7923	70.1308	76.0569	2.35763	2.49657	2.8406	2.66904	1.88803	6.68429	7.38418	7.57115	7.27897	5.8283	6.36474
240	-42.728	-26.7883	4.96505	-25.8609	-18.4765	12.0645	15.6032	17.8159	17.6313	13.7185	17.6262	21.1816	23.6548	23.3855	18.6904	7.29888	10.6485	13.6369	12.4843	9.07727	71.0869	70.1473	68.7923	70.1308	76.0569	2.35763	2.49657	2.8406	2.66904	1.88803	6.68429	7.38418	7.57115	7.27897	5.8283	6.29789
241	-42.728	-26.7883	14.9651	-25.8609	-18.4765	12.0645	15.6032	17.8159	17.6313	13.7185	17.6262	21.1816	23.6548	23.3855	18.6904	7.29888	10.6485	13.6369	12.4843	9.07727	71.0869	70.1473	68.7923	70.1308	76.0569	2.35763	2.49657	2.8406	2.66904	1.88803	6.68429	7.38418	7.57115	7.27897	5.8283	6.23158
242	-42.728	-26.7883	24.9651	-25.8609	-18.4765	12.0645	15.6032	17.8159	17.6313	13.7185	17.6262	21.1816	23.6548	23.3855	18.6904	7.29888	10.6485	13.6369	12.4843	9.07727	71.0869	70.1473	68.7923	70.1308	76.0569	2.35763	2.49657	2.8406	2.66904	1.88803	6.68429	7.38418	7.57115	7.27897	5.8283	6.16575
